# Supplementary material for: “Topological Significance” Analysis of Gene Expression and Proteomic Profiles from Prostate Cancer Cells Reveals Key Mechanisms of Androgen Response
Source: PubMed Central journal article supplement (PMC2880599; doi:10.1371/journal.pone.0010936), 2010-06-03
Supplement: pone.0010936.s001.pdf [file pone.0010936.s001.pdf]

**Up-regulated genes in treated vs. untreated cells**

| <b>Symbol</b>  | <b>Entrez Id</b> | <b>Description</b>                                                   |
|----------------|------------------|----------------------------------------------------------------------|
| SCN3           | 10456            | HCLS1 associated protein X-1                                         |
| ZBTB10         | 65986            | zinc finger and BTB domain containing 10                             |
| PTHRP, HHM, I  | 5744             | parathyroid hormone-like protein                                     |
| FLVCRL14q      | 55640            | feline leukemia virus subgroup C cellular receptor family, member 2  |
| hDIP           | 1831             | TSC-22 related protein                                               |
| LDLR           | 3949             | low density lipoprotein receptor                                     |
| PPFIBP2        | 8495             | PTPRF interacting protein, binding protein 2 (liprin beta 2)         |
| dJ142L7.2, FLJ | 51175            | epsilon-tubulin                                                      |
| WFDC4          | 6590             | secretory leukocyte protease inhibitor (antileukoproteinase)         |
| MGC132003      | 2746             | glutamate dehydrogenase 1                                            |
| VIMP           | 55829            | selenoprotein S                                                      |
| SAS            | 54187            | sialic acid synthase                                                 |
| MGC4504        | 79094            | ChaC, cation transport regulator-like 1 (E. coli)                    |
| OAT            | 4942             | ornithine aminotransferase (gyrate atrophy)                          |
| DAPL1          | 92196            | death associated protein-like 1                                      |
| LTF            | 4057             | neutrophil lactoferrin                                               |
| RP4-678I3      | 23566            | calcium-mobilizing lysophosphatidic acid receptor LP-A3              |
| FLJ22660       | 55839            | centromere protein N                                                 |
| SLC25A37       | 51312            | mitochondrial solute carrier protein                                 |
| NCU-G1         | 112770           | kidney predominant protein NCU-G1                                    |
| UCC1           | 54749            | ependymin related protein 1 (zebrafish)                              |
| LOC221710      | 221710           | LOC221710                                                            |
| KIAA1834       | 63916            | engulfment and cell motility 2                                       |
| SBBI03         | 10193            | neuregulin receptor degradation protein-1                            |
| MGC150532      | 116285           | medium-chain acyl-CoA synthetase                                     |
| RALDH3         | 220              | retinaldehyde dehydrogenase 3                                        |
| hPIP1          | 55003            | PAK/PLC-interacting protein 1                                        |
| TROP2, GA733   | 4070             | tumor-associated calcium signal transducer 2                         |
| bA108L7.1      | 81621            | Kazal-type serine peptidase inhibitor domain 1                       |
| KLHL29         | 114818           | kelch-like 29 (Drosophila)                                           |
| PRO1855, FLJ2  | 55379            | leucine rich repeat containing 59                                    |
| STQTL11        | 1021             | cell division protein kinase 6                                       |
| ACCA           | 31               | acetyl-Coenzyme A carboxylase alpha                                  |
| PSCA           | 8000             | prostate stem cell antigen                                           |
| MGC102869      | 284001           | coiled-coil domain containing 57                                     |
| LOC81691       | 81691            | exonuclease NEF-sp                                                   |
| ZNF145         | 7704             | zinc finger protein 145                                              |
| dJ417M14.2     | 4117             | serine/threonine protein kinase MAK                                  |
| dJ955L16.1     | 222546           | regulatory factor X domain containing 1                              |
| hR-PTPu        | 5797             | protein tyrosine phosphatase, receptor type, mu polypeptide          |
| KDEL3          | 11015            | KDEL (Lys-Asp-Glu-Leu)                                               |
| FLJ97621       | 9590             | kinase scaffold protein gravin                                       |
| TAHCCP2        | 25953            | paroxysmal nonkinesigenic dyskinesia                                 |
| SLC7A1         | 6541             | solute carrier family 7 (cationic amino acid transporter, y+ system) |
| P8             | 26471            | p8 protein                                                           |

|             |        |                                                                  |
|-------------|--------|------------------------------------------------------------------|
| p31         | 5714   | 26S proteasome regulatory subunit p31                            |
| LRIG1       | 26018  | leucine-rich repeats and immunoglobulin-like domains 1           |
| LOC653698   | 653698 | LOC653698                                                        |
| RHR         | 153    | beta-1-adrenergic receptor                                       |
| TRAPG       | 6747   | SSR gamma                                                        |
| RNS4        | 6038   | ribonuclease, RNase A family, 4                                  |
| Ssc2        | 54898  | elongation of very long chain fatty acids                        |
| C3orf25     | 90288  | chromosome 3 open reading frame 25                               |
| DUSP27      | 92235  | dual specificity phosphatase 27 (putative)                       |
| MANK        | 56172  | progressive ankylosis protein                                    |
| seladin-1   | 1718   | putative protein product of Nbla03646                            |
| beta4Gal-T1 | 2683   | UDP-Gal:betaGlcNAc beta 1,4-galactosyltransferase, polypeptide 1 |
| KIAA1338    | 440275 | eukaryotic translation initiation factor 2 alpha kinase 4        |
| UNQ847      | 493869 | EPLA847                                                          |
| hCTR1, CTR1 | 1317   | solute carrier family 31 (copper transporters), member 1         |
| xCT         | 23657  | cystine/glutamate transporter                                    |
| SLC16A6     | 9120   | solute carrier family 16, member 6                               |
| MIWC        | 361    | mercurial-insensitive water channel                              |
| ST4, CRYBG1 | 202    | suppression of tumorigenicity 4 (malignant melanoma)             |
| SF20        | 56005  | stromal cell-derived growth factor                               |
| bA375E1.3   | 25803  | SAM pointed domain containing ets transcription factor           |
| TMEM45A     | 55076  | transmembrane protein 45A                                        |
| MCCC2       | 64087  | methylcrotonoyl-Coenzyme A carboxylase 2 (beta)                  |
| Ang2        | 285    | Tie2-ligand                                                      |
| SpS         | 6611   | spermidine aminopropyltransferase                                |
| TU12        | 3992   | fatty acid desaturase 1                                          |
| PED         | 8682   | homolog of mouse MAT-1 oncogene                                  |
| TIS7        | 3475   | nerve growth factor-inducible protein PC4                        |
| ELL2        | 22936  | ELL-related RNA polymerase II, elongation factor                 |
| ERO1L       | 30001  | ERO1 (S. cerevisiae)-like                                        |
| VLDLRCH     | 7436   | very low density lipoprotein receptor                            |
| ps-PLA1     | 51365  | phosphatidylserine-specific phospholipase A1alpha                |
| SPCS4C      | 90701  | SEC11-like 3                                                     |
| BETA2AR     | 154    | catecholamine receptor                                           |
| FLJ25390    | 221481 | chromosome 6 open reading frame 81                               |
| RAM         | 5873   | RAB27A, member RAS oncogene family                               |
| TMCO3       | 55002  | transmembrane and coiled-coil domains 3                          |
| NMDMC       | 10797  | methylene tetrahydrofolate dehydrogenase 2                       |
| TMEPAI      | 56937  | transmembrane prostate androgen-induced protein                  |
| PIG13       | 81563  | chromosome 1 open reading frame 21                               |
| IG/EBP-1    | 1054   | CCAAT/enhancer binding protein gamma                             |
| SQLE        | 6713   | squalene epoxidase                                               |
| STK39       | 27347  | Ste20-like protein kinase                                        |
| TMEM27      | 57393  | transmembrane protein 27                                         |
| KRT18       | 3875   | cytokeratin 18                                                   |
| SAH         | 6296   | SA hypertension-associated homolog                               |
| GTC90       | 10466  | component of oligomeric golgi complex 5                          |

|                 |                                                                 |
|-----------------|-----------------------------------------------------------------|
| GALE            | 2582 galactowaldenase                                           |
| SAP1            | 2005 SRF accessory protein 1                                    |
| NO3             | 4681 neuroblastoma, suppression of tumorigenicity 1             |
| TDD5            | 10397 differentiation-related gene 1 protein                    |
| STAT12, SSI2, S | 8835 suppressor of cytokine signaling-2                         |
| MGC13170        | 84798 multidrug resistance-related protein                      |
| CLDN8           | 9073 claudin 8                                                  |
| Rcal, PIG20, FL | 5954 proliferation-inducing gene 20                             |
| MGC74725        | 54676 GTP binding protein 2                                     |
| TS11            | 440 asparagine synthetase                                       |
| HSD10           | 161835 fibrous sheath interacting protein 1                     |
| S100P           | 6286 migration-inducing gene 9                                  |
| LOC144481       | 144481 LOC144481                                                |
| c-MAF           | 4094 Avian musculoaponeurotic fibrosarcoma (MAF) protooncogene  |
| MGC43380        | 4211 Meis1, myeloid ecotropic viral integration site 1 homolog  |
| MGC105112       | 4015 protein-lysine 6-oxidase                                   |
| TM4SF1          | 4071 tumor-associated antigen L6                                |
| SMAD1           | 2617 Charcot-Marie-Tooth neuropathy, neuronal type, D           |
| PFKFB2          | 5208 PFKFB, cardiac                                             |
| PART1           | 25859 PART1                                                     |
| SSAT-1          | 6303 spermidine/spermine N1-acetyltransferase                   |
| PCNXL2          | 80003 pecanex-like 2                                            |
| ATF3            | 467 activating transcription factor 3                           |
| ISG20           | 3669 interferon stimulated exonuclease gene 20kDa               |
| IRS2            | 8660 insulin receptor substrate 2                               |
| ZAG             | 563 alpha-2-glycoprotein 1, zinc                                |
| WWTR1           | 25937 transcriptional co-activator with PDZ-binding motif (TAZ) |
| MGC132014       | 8821 inositol polyphosphate-4-phosphatase, type II, 105kDa      |
| PGDH1           | 3248 15-hydroxyprostaglandin dehydrogenase                      |
| KLF5            | 688 transcription factor BTEB2                                  |
| NNMT            | 4837 nicotinamide N-methyltransferase                           |
| UGT2B4          | 7363 UDP-glucuronyltransferase, family 2, beta-4                |
| NKX3A           | 4824 NK3 homeobox 1                                             |
| hFZ8            | 8325 frizzled 8                                                 |
| SLC41A1         | 254428 solute carrier family 41 member 1                        |
| HERC5           | 51191 cyclin-E binding protein 1                                |
| RNF188          | 79872 Casitas B-lineage lymphoma-like                           |
| WDR37           | 22884 WD repeat domain 37                                       |
| B2M             | 567 beta chain of MHC class I molecules                         |
| bHLHe40         | 8553 differentially expressed in chondrocytes 1                 |
| Dip2, KIAA018   | 23181 DIP2 disco-interacting protein 2 homolog A (Drosophila)   |
| PPAPDC1B        | 84513 diacylglycerol pyrophosphate like 1                       |
| TMCC3           | 57458 transmembrane and coiled-coil domains 3                   |
| p64H1           | 25932 chloride intracellular channel 4                          |
| RAB39B          | 116442 RAB39B, member RAS oncogene family                       |
| KIAA1001        | 22901 Arylsulfatase G                                           |
| bHLHa15         | 168620 muscle, intestine and stomach expression 1               |

|                 |        |                                                                    |
|-----------------|--------|--------------------------------------------------------------------|
| slow-type       | 4604   | skeletal muscle C-protein                                          |
| RALT            | 54206  | mitogen-inducible gene 6 protein                                   |
| hTC-1           | 56892  | thyroid cancer-1                                                   |
| TBRG1           | 84897  | nuclear interactor of ARF and MDM2                                 |
| MGC111507       | 353322 | low density lipoprotein receptor-related protein binding protein   |
| PSAT1           | 29968  | endometrial progesterone-induced protein                           |
| mSLO1           | 3778   | bA205K10.1 (potassium large conductance calcium-activated channel) |
| SOUL            | 23593  | placental protein 23                                               |
| MGC104991       | 3570   | interleukin 6 receptor alpha subunit                               |
| Ska1            | 220134 | spindle and KT (kinetochore) associated 1                          |
| KDELR2          | 11014  | ERD-2-like protein                                                 |
| TCF5            | 1051   | transcription factor 5                                             |
| BTG1            | 694    | B-cell translocation protein 1                                     |
| SLC26A3         | 1811   | solute carrier family 26, member 3                                 |
| dJ1103G7.3, TI  | 57761  | p65-interacting inhibitor of NF-kappaB                             |
| hcp-6           | 23310  | non-SMC condensin II complex, subunit D3                           |
| TLH             | 5352   | lysyl hydroxylase 2                                                |
| RP11-402G3.2    | 203197 | chromosome 9 open reading frame 91                                 |
| MLD, Des-1, DI  | 8560   | dihydroceramide desaturase                                         |
| MGC70414        | 1622   | diazepam binding inhibitor, splice form 1c                         |
| MGC4154         | 1649   | growth arrest- and DNA damage-inducible                            |
| SLC43A1         | 8501   | solute carrier family 43, member 1                                 |
| FLJ11773        | 60673  | hypothetical protein LOC60673                                      |
| NIBAN           | 116496 | niban protein                                                      |
| TMP, CL-20      | 2012   | epithelial membrane protein 1                                      |
| MGC54182        | 51303  | FK506 binding protein 11, 19 kDa                                   |
| SRPRB           | 58477  | signal recognition particle receptor, beta subunit                 |
| SLC4A5          | 57835  | sodium bicarbonate transporter 4                                   |
| SPAL2           | 57568  | SPA-1-like 2                                                       |
| PPM1E           | 22843  | partner of PIX 1                                                   |
| nicein-150kDa,  | 3909   | epiligrin alpha 3 subunit                                          |
| hSK2            | 3781   | potassium intermediate                                             |
| KIAA0293, CDF   | 23316  | cut-like 2                                                         |
| KIAA1254        | 9236   | cell cycle progression 8 protein                                   |
| STK37           | 23178  | PAS-serine/threonine kinase                                        |
| LOC401623       | 401623 | LOC401623                                                          |
| MGC15366        | 3880   | keratin, type I, 40-kd                                             |
| YTS, YRS, tyrRS | 8565   | tyrosine tRNA ligase 1, cytoplasmic                                |
| YMR292W         | 51026  | golgi transport 1 homolog B                                        |
| TNFAIP9         | 79689  | STEAP family member 4                                              |
| P4501B1         | 1545   | cytochrome P450, family 1, subfamily B, polypeptide 1              |
| SLC3A2          | 6520   | antigen defined by monoclonal antibody 4F2, heavy chain            |
| TXREB           | 468    | activating transcription factor 4                                  |
| TC              | 1604   | decay accelerating factor for complement                           |
| NICAL           | 64780  | microtubule associated monooxygenase                               |
| MRP4, EST170    | 10257  | ATP-binding cassette, sub-family C, member 4                       |
| NBPF15          | 284565 | hypothetical protein LOC284565                                     |

|                |                                                                   |
|----------------|-------------------------------------------------------------------|
| dJ292B18.2     | 25902 methylenetetrahydrofolate dehydrogenase                     |
| U19            | 55840 ELL-associated factor 2                                     |
| VPF            | 7422 vascular permeability factor                                 |
| PICD           | 3417 oxalosuccinate decarboxylase                                 |
| ODC1           | 4953 ornithine decarboxylase 1                                    |
| STK17B         | 9262 serine/threonine kinase 17b                                  |
| TAP1           | 23541 tocopherol-associated protein                               |
| hG28K          | 58480 ras homolog gene family, member U                           |
| NYD-sp9        | 9848 microfibrillar-associated protein 3-like                     |
| MGC1405        | 3638 INSIG-1 membrane protein                                     |
| WIPI49         | 55062 WIPI-1 alpha                                                |
| TMEM79         | 84283 transmembrane protein 79                                    |
| MGC163279      | 2081 endoplasmic reticulum to nucleus signaling 1                 |
| MGC15563       | 84962 ajuba                                                       |
| rap1GAPII      | 5909 RAP1, GTPase activating protein 1                            |
| U-MAF          | 23764 transcription factor MAFF                                   |
| GPT2           | 84706 glutamic pyruvate transaminase (alanine aminotransferase) 2 |
| DC13           | 56942 hypothetical protein LOC56942                               |
| SERS           | 6301 seryl-tRNA synthetase                                        |
| SEC24D         | 9871 SEC24 (S. cerevisiae) related gene family, member D          |
| PLML           | 5349 FXFD domain-containing ion transport regulator 3             |
| TMPRSS2        | 7113 epitheliasin                                                 |
| FLJ23563       | 79993 elongation of very long chain fatty acids-like 7            |
| YVTM2421       | 64778 factor for adipocyte differentiation 104                    |
| SCD1           | 6319 acyl-CoA desaturase                                          |
| NRXN4          | 26047 homolog of Drosophila neurexin IV                           |
| TXNL1CL        | 57095 chromosome 1 open reading frame 128                         |
| RNF69          | 5192 peroxisome biogenesis factor 10                              |
| RTP801, FLJ20! | 54541 RTP801                                                      |
| TNS3           | 64759 tumor endothelial marker 6                                  |
| MGC18216       | 3480 insulin-like growth factor 1 receptor                        |
| DLX1           | 1745 distal-less homeobox 1                                       |
| STYI           | 55808 GalNAc alpha-2, 6-sialyltransferase I                       |
| MGC72127       | 22998 LIM and calponin homology domains 1                         |
| bHLHc5         | 55897 mesoderm posterior 1 homolog (mouse)                        |
| FLJ22590       | 27034 acyl-coenzyme A dehydrogenase 8                             |
| WASH3P         | 374666 WAS protein family homolog 3 pseudogene                    |
| MCT            | 79648 microcephaly, primary autosomal recessive 1                 |
| claudin-1      | 1366 claudin 7                                                    |
| NF-IL6-beta    | 1052 CCAAT/enhancer binding protein delta                         |
| DNASE2B        | 58511 endonuclease DLAD                                           |
| PHPS1-2        | 11057 abhydrolase domain containing 2                             |
| SLC2A3         | 6515 GLUCOSE TRANSPORTER TYPE 3, BRAIN                            |
| MGC87297       | 3915 formerly LAMB2                                               |
| hVPLA(2)       | 5322 phosphatidylcholine 2-acylhydrolase                          |
| Vesl-2         | 9455 cupidin                                                      |
| PRO2194        | 2181 fatty-acid-Coenzyme A ligase, long-chain 3                   |

|                |                                                                          |
|----------------|--------------------------------------------------------------------------|
| EDEM3          | 80267 ER degradation-enhancing -mannosidase-like protein 3               |
| MLT1           | 10892 MALT associated translocation                                      |
| MGC43127       | 9935 transcription factor MAFB                                           |
| WWC1           | 23286 WW, C2 and coiled-coil domain containing 1                         |
| SDK1           | 221935 sidekick 1                                                        |
| NSMAF          | 8439 neutral sphingomyelinase (N-SMase) activation associated factor     |
| FLJ25053       | 147463 ankyrin repeat domain 29                                          |
| MGC33365       | 205428 hypothetical protein LOC205428                                    |
| SUP            | 9709 homocysteine-inducible endoplasmic reticulum                        |
| ADH3           | 126 alcohol dehydrogenase 3 (class I), gamma polypeptide                 |
| UAP1           | 6675 sperm associated antigen 2                                          |
| SLC16A1        | 6566 solute carrier family 16, member 1                                  |
| ZNF450         | 9841 zinc finger protein 450                                             |
| BTN3A3         | 10384 butyrophilin, subfamily 3, member A3                               |
| GNMT           | 27232 glycine N-methyltransferase                                        |
| PDIR, FLJ30401 | 10954 for protein disulfide isomerase-related                            |
| NEDL2          | 57520 HECT, C2 and WW domain containing E3 ubiquitin protein ligase 2    |
| SP8            | 221833 Sp8 transcription factor                                          |
| PSP94          | 4477 seminal plasma beta-inhibin                                         |
| SARG, FLJ3650  | 79098 specifically androgen-regulated protein                            |
| hK2            | 3817 kallikrein 2, prostatic                                             |
| TNFAIP8        | 25816 tumor necrosis factor, alpha-induced protein 8                     |
| TACC2          | 10579 transforming, acidic coiled-coil containing protein 2              |
| RAXLX          | 91464 intestine-specific homeobox                                        |
| ORM2           | 5005 alpha-1-acid glycoprotein, type 2                                   |
| hSgt2p         | 8496 protein-tyrosine phosphatase receptor-type f                        |
| DKFZp686M20    | 55973 B-cell receptor-associated protein 29                              |
| RACE           | 23600 alpha-methylacyl-CoA racemase                                      |
| WS2D           | 6591 slug homolog, zinc finger protein                                   |
| MGC9471        | 1491 homoserine dehydratase                                              |
| TRPP8          | 79054 short form of the TRPM8 cationic channel                           |
| EST422562, AE  | 340273 P-glycoprotein ABCB5                                              |
| GLUDP1         | 2747 glutamate dehydrogenase pseudogene 1                                |
| PTGER4         | 5734 prostaglandin E receptor 4, subtype EP4                             |
| MGC35403       | 254427 chromosome 10 open reading frame 47                               |
| hD52           | 7163 tumor protein D52                                                   |
| SLC35F2        | 54733 solute carrier family 35, member F2                                |
| c14_5270       | 122525 hypothetical protein LOC122525                                    |
| bA526D8.1      | 23299 bicaudal D homolog 2                                               |
| TYP            | 1846 serine/threonine specific protein phosphatase                       |
| WARS           | 7453 tryptophan tRNA ligase 1, cytoplasmic                               |
| MGC104194      | 54431 J-domain-containing protein disulfide isomerase-like protein       |
| ZNF595         | 152687 zinc finger protein 595                                           |
| MGC51750       | 476 Na <sup>+</sup> /K <sup>+</sup> ATPase 1                             |
| SCRG1          | 11341 scrapie responsive protein 1                                       |
| P450SCC        | 1583 steroid 20-22-lyase                                                 |
| PHAS-I         | 1978 phosphorylated heat- and acid-stable protein regulated by insulin 1 |

|                 |        |                                                           |
|-----------------|--------|-----------------------------------------------------------|
| KLF4            | 9314   | endothelial Kruppel-like zinc finger protein              |
| FLJ35024        | 401491 | FLJ35024                                                  |
| KIAA1851        | 29925  | mannose-1-phosphate guanylyltransferase                   |
| Ptg-10          | 2289   | rotamase                                                  |
| TTC39A          | 22996  | tetratricopeptide repeat domain 39A                       |
| OACT2           | 129642 | lysophospholipid acyltransferase                          |
| SWS             | 3977   | CD118 antigen                                             |
| PSPH            | 5723   | L-3-phosphoserine phosphatase                             |
| SLC6A9          | 6536   | solute carrier family 6 member 9                          |
| SDPII           | 11252  | protein kinase C and casein kinase substrate in neurons 2 |
| KRT8            | 3856   | keratin, type II cytoskeletal 8                           |
| CLGN            | 1047   | calmegin                                                  |
| SORD1           | 6652   | sorbitol dehydrogenase                                    |
| Q10, AGO2       | 27161  | eukaryotic translation initiation factor 2C, 2            |
| MGC111402       | 55784  | multiple C2-domains with two transmembrane regions 2      |
| UGT2B28         | 54490  | UDP glycosyltransferase 2 family, polypeptide B28         |
| LOC285463       | 285463 | LOC285463                                                 |
| XAG-2, HAG-2,   | 10551  | anterior gradient homolog 2 ( <i>Xenopus laevis</i> )     |
| testican-1      | 6695   | testican-1                                                |
| PTGFB           | 9518   | PTGF-beta                                                 |
| ARF1            | 375    | ADP-ribosylation factor 1                                 |
| KIAA0746        | 23231  | KIAA0746                                                  |
| MGC102891       | 400451 | hypothetical protein LOC400451                            |
| Yo              | 1039   | paraneoplastic cerebellar degeneration-associated antigen |
| MSTP049         | 4189   | endoplasmic reticulum DnaJ homolog 4                      |
| IQGAP2          | 10788  | IQ motif containing GTPase activating protein 2           |
| nPKC-eta        | 5583   | protein kinase C, eta                                     |
| KIAA0032        | 8916   | hect domain and RLD 3                                     |
| RHOGAP3         | 1124   | beta chimerin                                             |
| SLC1A4          | 6509   | solute carrier family 1, member 4                         |
| l1rk3, l(1)-3rk | 79083  | exophilin-3                                               |
| PNLIP           | 5406   | triacylglycerol acylhydrolase                             |
| bA101E13.1      | 51022  | bA101E13.1 (GRX2 glutaredoxin (thioltransferase) 2)       |
| STCRP           | 8614   | STC-related protein                                       |
| Ubc6p           | 51465  | non-canonical ubiquitin conjugating enzyme 1              |
| TSC22D1         | 8848   | transforming growth factor beta-stimulated protein TSC-22 |
| PGM3            | 5238   | phosphoglucomutase 3                                      |
| KIAA0575        | 9687   | GREB1                                                     |
| SHMT2           | 6472   | serine hydroxymethyltransferase 2 (mitochondrial)         |
| TCRGC2          | 445347 | T-cell receptor gamma-chain constant region               |
| STCH            | 6782   | microsomal stress 70 protein ATPase core                  |
| MGC1947         | 128239 | IQ motif containing GTPase activating protein 3           |
| PEPCK2          | 5106   | mitochondrial phosphoenolpyruvate carboxykinase 2         |
| SLC45A3         | 85414  | prostate cancer-associated gene 6                         |
| PTPN10          | 1843   | dual specificity phosphatase 1                            |
| FLJ31715        | 152048 | FLJ31715                                                  |
| dJ483K16.1      | 60481  | homolog of yeast long chain polyunsaturated fatty acid    |

|              |                                                             |
|--------------|-------------------------------------------------------------|
| RAB3B        | 5865 Brain antigen RAB3B                                    |
| hJAL         | 148327 cAMP responsive element binding protein 3-like 4     |
| KIAA1822L    | 79802 KIAA1822-like                                         |
| SLC2A10      | 81031 solute carrier family 2 member 10                     |
| MLL-MAML2    | 84441 mastermind-like 2                                     |
| hK3          | 354 P-30 antigen                                            |
| PRX-4        | 10549 thioredoxin peroxidase (antioxidant enzyme)           |
| MGC88092     | 23052 endonuclease domain containing 1                      |
| WHIM         | 7852 leukocyte-derived seven-transmembrane-domain receptor  |
| MGC125753    | 25874 brain protein 44                                      |
| PGC          | 5225 Preprogastricsin                                       |
| C9orf152     | 401546 chromosome 9 open reading frame 152                  |
| HEP27        | 10202 dehydrogenase/reductase member 2                      |
| CTBS         | 1486 chitobiase, di-N-acetyl-                               |
| beta4GalNAcT | 55790 chondroitin beta1,4 N-acetylgalactosaminyltransferase |
| MGC31935     | 2342 farnesyltransferase, CAAX box, beta                    |
| PSD-93       | 1740 channel-associated protein of synapses, 110kDa         |
| YLR066W      | 60559 signal peptidase complex subunit 3                    |
| SLC1A5       | 6510 neutral amino acid transporter B                       |
| EXTR2        | 2135 exostosin-like 2                                       |



## Down-regulated genes in treated vs. untreated cells

| Symbol               | Entrez Id | Description                                                        |
|----------------------|-----------|--------------------------------------------------------------------|
| hCG_1815491          | 643911    | hCG_1815491                                                        |
| TLL1                 | 7092      | tolloid-like 1                                                     |
| PTHRP, HHM, PLP, P   | 5744      | parathyroid hormone-like protein                                   |
| ADAMTS6              | 11174     | a disintegrin and metalloproteinase with thrombospondin motifs 6   |
| C21orf81             | 114035    | chromosome 21 open reading frame 81                                |
| BARD1                | 580       | BRCA1-associated RING domain gene 1                                |
| TRPS1                | 7227      | zinc finger transcription factor TRPS1                             |
| SMA5                 | 11042     | SMA5                                                               |
| PAP                  | 55        | acid phosphatase, prostate                                         |
| RIMS1                | 22999     | regulating synaptic membrane exocytosis 1                          |
| HIST1H4B             | 8366      | H4 histone family, member I                                        |
| MGC9481              | 3790      | potassium voltage-gated channel delayed-rectifier protein S3       |
| hRCN3                | 11123     | regulator of calcineurin 3                                         |
| TUSP, KIAA1397       | 56995     | tubby super-family protein                                         |
| U2AF65               | 11338     | U2 snRNP auxiliary factor large subunit                            |
| WLS                  | 79971     | putative NFkB activating protein 373                               |
| DKFZp761D112         | 84257     | chromosome 8 open reading frame 57                                 |
| PTPLA                | 9200      | cementum attachment protein                                        |
| hIAN2                | 474344    | immune associated nucleotide 2                                     |
| HOXC9                | 3225      | homeo box C9                                                       |
| PRAC                 | 84366     | prostate, rectum and colon                                         |
| RP11-35N6.1          | 54886     | plasticity related gene 3                                          |
| TSG7, SEN4, ETS7q, I | 7982      | suppression of tumorigenicity 7                                    |
| GRPP                 | 2641      | glucagon                                                           |
| hEndo                | 79694     | mandaselin                                                         |
| SNK                  | 10769     | serum-inducible kinase                                             |
| smMLCK               | 4638      | myosin light chain kinase                                          |
| NCAG1, FLJ11477      | 92126     | chromosome 18 open reading frame 4                                 |
| NFKBIZ               | 64332     | nuclear factor of kappa light polypeptide gene enhancer in B-cells |
| neuroserpin          | 5274      | serpin peptidase inhibitor, clade I (neuroserpin), member 1        |
| HOXC13               | 3229      | homeo box C13                                                      |
| SVIP                 | 258010    | SVIP                                                               |
| RDC1, GPR159         | 57007     | G protein-coupled receptor                                         |
| hCERK, FLJ23239, dA  | 64781     | ceramide kinase                                                    |
| SEMA6D               | 80031     | semaphorin 6D                                                      |
| psiNAIP              | 4671      | psi neuronal apoptosis inhibitory protein                          |
| TSPAN7               | 7102      | transmembrane 4 superfamily 2b                                     |
| HOXC6                | 3223      | homeobox C6                                                        |
| FLJ34534             | 1281      | collagen, fetal                                                    |
| PRDM3                | 2122      | oncogene EVI1                                                      |
| Orf3, GASZ, ALP1     | 136991    | ankyrin repeat, SAM and basic leucine zipper domain containing 1   |
| UGT2B17              | 7367      | UDP glycosyltransferase 2 family, polypeptide B17                  |
| DKFZp781I035         | 1612      | death-associated protein kinase 1                                  |
| MAST4                | 375449    | microtubule associated serine/threonine kinase family member 4     |
| TGM3                 | 7053      | transglutaminase 3                                                 |

|                     |                                                                 |
|---------------------|-----------------------------------------------------------------|
| efg                 | 4602 c-myb13A_CDS                                               |
| ZCWCC3              | 23515 MORC family CW-type zinc finger 3                         |
| STMY2               | 4319 matrix metalloproteinase 10 (stromelysin 2)                |
| ZSIG13              | 11098 protease, serine, 23                                      |
| Sp110               | 5376 growth arrest-specific 3                                   |
| RDH10               | 157506 retinol dehydrogenase 10 (all-trans)                     |
| dj1158H2.1          | 80258 EF-hand domain (C-terminal) containing 2                  |
| NFH                 | 4744 neurofilament, heavy polypeptide 200kDa                    |
| ZBBX                | 79740 zinc finger, B-box domain containing                      |
| TEM8, FLJ21776, FLJ | 84168 anthrax toxin receptor 1                                  |
| sPLA2               | 5320 synovial phospholipase-A2                                  |
| DKFZp761I1510       | 160851 diacylglycerol kinase, eta                               |
| nm23-H7             | 29922 non-metastatic cells 7                                    |
| RARHOGAP            | 57569 RA and RhoGAP domain containing protein                   |
| MATN2               | 4147 matrilin 2                                                 |
| baA22L21.1          | 29078 hormone-regulated proliferation-associated 20 kDa protein |
| PLCB4               | 5332 phospholipase C beta 4                                     |
| TINUR, NOT, RNR1, I | 4929 transcriptionally inducible nuclear receptor related 1     |
| MGC87039            | 440926 H3 histone, family 3A pseudogene                         |
| TYRO4               | 2042 ephrin receptor EphA3                                      |
| FLJ25291            | 90355 hypothetical protein LOC90355                             |
| PLXNA2              | 5362 transmembrane protein OCT                                  |
| LOC440087           | 440087 hypothetical protein LOC440087                           |
| NAB1                | 4664 NGFI-A binding protein 1                                   |
| RZRA, ROR1, ROR2, I | 6095 retinoic acid receptor-related orphan receptor alpha       |
| NOV                 | 4856 nephroblastoma overexpressed gene                          |
| PSGR2               | 143503 olfactory receptor OR11-15                               |
| MAGI1               | 154043 membrane associated guanylate kinase                     |
| VLGR1b              | 84059 G protein-coupled receptor 98                             |
| RBPMS               | 11030 RNA binding protein with multiple splicing                |
| NAIP1B              | 728519 NAIP1B                                                   |
| RANBP3L             | 202151 RAN binding protein 3-like                               |
| TMEM144             | 55314 transmembrane protein 144                                 |
| MGC1798             | 481 Na, K-ATPase beta-1 polypeptide                             |
| LRIG3               | 121227 leucine-rich repeats and immunoglobulin-like domains 3   |
| TMEM34              | 55751 transmembrane protein 34                                  |
| RFX3                | 5991 regulatory factor X, 3                                     |
| LOC728160           | 728160 hypothetical LOC728160                                   |
| SLC35F3             | 148641 solute carrier family 35, member F3                      |
| ZNF703              | 80139 zinc finger protein 703                                   |
| MGC142015           | 3912 laminin, beta 1                                            |
| CBLN2               | 147381 cerebellin 2                                             |
| VEG1192A            | 9966 tumor necrosis factor (ligand) superfamily, member 15      |
| RSS                 | 2887 growth factor receptor-bound protein 10                    |
| FST                 | 10468 follistatin                                               |
| ZNFXY               | 4281 tripartite motif protein TRIM18                            |
| MGC131893           | 23242 cordon-bleu homolog                                       |

|                    |                                                                      |
|--------------------|----------------------------------------------------------------------|
| NZF1               | 23040 neural zinc finger transcription factor 1                      |
| FLJ37576           | 114899 complement-c1q tumor necrosis factor-related protein 3        |
| PCDHY              | 27328 protocadherin X                                                |
| TMEM23             | 259230 sphingomyelin synthase 1                                      |
| SYND4, amphiglycan | 6385 ryudocan amphiglycan                                            |
| FLJ45803           | 399948 chromosome 11 open reading frame 92                           |
| TRIB1              | 10221 G-protein-coupled receptor induced protein                     |
| TSPAN8             | 7103 tetraspanin 8                                                   |
| ADDL               | 120 adducin-like protein 70                                          |
| IRXB2              | 10265 iroquois homeobox 5                                            |
| PPDIV              | 2737 GLI-Kruppel family member GLI3                                  |
| VEPTP              | 5787 protein tyrosine phosphatase, receptor type, B                  |
| NLRR-1             | 57633 leucine rich repeat neuronal 1                                 |
| NDUFB4             | 4710 NADH dehydrogenase (ubiquinone) 1 beta subcomplex               |
| ZNF294             | 26046 zinc finger protein 294                                        |
| DDC                | 1644 dopa decarboxylase (aromatic L-amino acid decarboxylase)        |
| MT2A               | 4502 metallothionein 2A                                              |
| KIAA1466           | 57612 KIAA1466                                                       |
| Slo3               | 157855 potassium channel, subfamily U, member 1                      |
| MRP2               | 57626 Mayven-related protein 2                                       |
| ATPIS              | 23250 phospholipid-translocating ATPase                              |
| MGC61909           | 2591 GalNAc transferase 3                                            |
| RCBTB2             | 1102 chromosome condensation 1-like                                  |
| PRO1341            | 213 cell growth inhibiting protein 42                                |
| MCC1               | 4163 mutated in colorectal cancers                                   |
| MGC99678           | 2852 IL8-related receptor                                            |
| MGC15664           | 84517 actin related protein M1                                       |
| MGC20446           | 220002 cytochrome b, ascorbate dependent 3                           |
| LOC644914          | 644914 similar to H3 histone, family 3B                              |
| UGT8               | 7368 UDP glycosyltransferase 8                                       |
| LOC647595          | 647595 LOC647595                                                     |
| bA386N14.2         | 7403 ubiquitously transcribed tetratricopeptide repeat, X chromosome |
| SI                 | 6476 Oligosaccharide alpha-1,6-glucosidase                           |
| MGC105131          | 10144 family with sequence similarity 13, member A1                  |
| LOC120376          | 120376 hypothetical protein LOC120376                                |
| RIP-1              | 11103 HIV-1 rev binding protein 2                                    |
| RP11-378J18.7      | 64853 axin interactor, dorsalization associated                      |
| RTN1               | 6252 reticulon 1                                                     |
| MGC130023          | 90161 heparan sulfate 6-O-sulfotransferase 2                         |
| bA307O14.2         | 93663 Rho GTPase activating protein 18                               |
| SLC44A1            | 23446 CDW92 antigen                                                  |
| KLHDC8A            | 55220 kelch domain containing 8A                                     |
| MCTP1              | 79772 multiple C2-domains with two transmembrane regions 1           |
| PMS2CL             | 441194 PMS2 C-terminal like pseudogene                               |
| ZNF680             | 340252 zinc finger protein 680                                       |
| TLIMP              | 57561 thioredoxin-binding protein-2-like inducible membrane          |
| NTS1               | 4922 neurotensin                                                     |

|                    |                                                               |
|--------------------|---------------------------------------------------------------|
| SEST1, PA26        | 27244 sestrin 1                                               |
| O/E-2              | 253738 early B-cell factor 3                                  |
| LOC728431          | 728431 hypothetical LOC728431                                 |
| IRX3               | 79191 iroquois homeobox protein 3                             |
| PLCeta1            | 23007 phospholipase C-like 3                                  |
| TCF1ALPHA          | 51176 lymphoid enhancer binding factor-1                      |
| NCAM21, MGC5100    | 4685 neural cell adhesion molecule 2                          |
| MGC15604           | 131034 copine IV                                              |
| PTPRR              | 5801 protein-tyrosine phosphatase NC-PTPCOM1                  |
| TRPM2              | 1191 testosterone-repressed prostate message 2                |
| RP11-255E17.1      | 9411 Rho GTPase activating protein 29                         |
| HOXA13             | 3209 homeo box 1J                                             |
| PRKD1              | 5587 protein kinase D1                                        |
| PSP24B             | 81491 brain expressed G-protein-coupled receptor PSP24 beta   |
| STXBP5L            | 9515 tomosyn-like                                             |
| VTA1               | 51534 chromosome 6 open reading frame 55                      |
| fibroglycan, SYND2 | 6383 heparan sulfate proteoglycan core protein                |
| ZIC2               | 7546 zinc finger protein of the cerebellum 2                  |
| FLJ38295           | 388815 hypothetical protein LOC388815                         |
| MGC3032            | 65998 MGC3032                                                 |
| HVH3               | 1847 dual specificity phosphatase 5                           |
| VIGR               | 57211 developmentally regulated G-protein-coupled receptor    |
| LOC728555          | 728555 LOC728555                                              |
| PTGER3             | 5733 prostaglandin receptor (PGE-2)                           |
| STK3               | 6788 serine/threonine kinase 3 (Ste20, yeast homolog)         |
| E1                 | 590 butyrylcholinesterase                                     |
| GUSBP1             | 153561 glucuronidase, beta pseudogene 1                       |
| RFTN1              | 23180 proliferation-inducing protein 10                       |
| FADS8              | 123099 sphingolipid delta 4 desaturase/C-4 hydroxylase        |
| KIAA1890           | 64478 CUB and Sushi multiple domains 1                        |
| SLC12A2            | 6558 solute carrier family 12                                 |
| DEGA               | 347902 amphoterin induced gene 2                              |
| VR20               | 60437 cadherin-like protein VR20                              |
| MGC29633           | 3495 immunoglobulin heavy constant delta                      |
| ANKRD20A2          | 441430 ankyrin repeat domain 20 family, member A2             |
| ROC2               | 6014 Ric-like, expressed in neurons                           |
| LOC643187          | 643187 LOC643187                                              |
| NUDT4              | 11163 diphosphoinositol polyphosphate phosphohydrolase type 2 |
| OTTHUMG00000066    | 728747 ankyrin repeat domain 20 family, member A4             |
| SLITRK3            | 22865 slit and trk like gene 3                                |
| NUDT4P1            | 440672 nudix (nucleoside diphosphate linked moiety X)         |
| LOC727770          | 727770 LOC727770                                              |
| DKFZp434A171       | 84210 ankyrin repeat domain 20A                               |
| PCDHY              | 83259 protocadherin Y                                         |
| LOC727762          | 727762 similar to NADH:ubiquinone oxidoreductase B15 subunit  |
| SPAG9              | 9043 sperm surface protein                                    |
| OPRK1              | 4986 opioid receptor, kappa 1                                 |

|                      |                                                                      |
|----------------------|----------------------------------------------------------------------|
| b55C20.2             | 11039 SMA4                                                           |
| mGCP                 | 2346 prostate specific membrane antigen variant F                    |
| Kir3.1, GIRK1, KGA   | 3760 G protein-activated inward rectifier potassium channel 1        |
| dJ718P11.1, FLJ11111 | 55304 serine palmitoyltransferase, long chain base subunit 3         |
| MGC104684            | 1487 C-terminal binding protein 1                                    |
| UG0636c06            | 84698 calcyphosphine 2                                               |
| hdhc9                | 1769 dynein, axonemal, heavy chain 8                                 |
| PSCTK3               | 660 BMX non-receptor tyrosine kinase                                 |
| KAO                  | 26 kidney amine oxidase                                              |
| PMSL2                | 5395 postmeiotic segregation increased ( <i>S. cerevisiae</i> ) 2    |
| SSBP2                | 23635 single-stranded DNA binding protein 2                          |
| OSR2                 | 116039 odd-skipped related 2 ( <i>Drosophila</i> )                   |
| FLJ38155, DKFZp434   | 51313 hypothetical protein LOC51313                                  |
| TDAG51, DT1P1B11,    | 22822 proline-histidine rich protein                                 |
| ARG1                 | 383 arginase, type I                                                 |
| LOC286367            | 286367 LOC286367                                                     |
| VIA                  | 57556 sema domain, transmembrane domain (TM), and cytoplasmic domain |
| LOH11CR1D            | 2230 adrenodoxin                                                     |
| SYTL2                | 54843 exophilin-4                                                    |
| hWNT5A               | 7474 wingless-type MMTV integration site family, member 5A           |
| bA12D24.3.2          | 6013 prorelaxin                                                      |
| SPG31                | 65055 receptor expression enhancing protein 1                        |
| DKFZp54711415        | 90141 CG11165-like                                                   |
| p55-GAMMA            | 8503 phosphoinositide-3-kinase, regulatory subunit                   |
| MGC10430             | 3557 intracellular IL-1 receptor antagonist type II                  |
| UNRIP, pt-wd, MAW    | 11171 unr-interacting protein                                        |
| IGFBP3               | 3486 binding protein 53                                              |
| ANKRD20A3            | 441425 ankyrin repeat domain 20 family, member A3                    |
| SOBP                 | 55084 sine oculis binding protein homolog ( <i>Drosophila</i> )      |
| MIR1                 | 83856 fibronectin type III and SPRY domain containing 1-like         |
| TIMP2                | 7077 tissue inhibitor of metalloproteinases 2                        |
| MGC105115            | 1290 type V procollagen alpha 2 chain                                |
| TUBA3, B-ALPHA-1, I  | 7846 tubulin, alpha 3                                                |
| FIGNL1               | 63979 fidgetin-like 1                                                |
| LOC149478            | 149478 hypothetical protein LOC149478                                |
| MGC34732, FLJ4211    | 220047 coiled-coil domain containing 83                              |
| NETO1                | 81832 neuropilin- and tolloid-like protein 1                         |
| RP11-401M16.1        | 55450 calcium/calmodulin-dependent protein kinase II inhibitor 1     |
| pro-NRG3             | 10718 neuregulin-3-like polypeptide                                  |
| hRCN2                | 10231 Down syndrome critical region gene 1-like 1                    |
| ANXA9                | 8416 annexin XXXI                                                    |
| MGC87783             | 3020 H3 histone, family 3A                                           |
| TGD                  | 19 ATP binding cassette transporter 1                                |
| PRKACN2              | 5570 PKI-beta                                                        |
| maba1, EIG121        | 57535 hypothetical protein LOC57535                                  |
| GRB14                | 2888 growth factor receptor-bound protein 14                         |
| ST8SIA4              | 7903 sialyltransferase 8 (alpha-2, 8-polysialyltransferase) D        |

|                     |                                                                    |
|---------------------|--------------------------------------------------------------------|
| MAN9                | 4121 Man9-mannosidase                                              |
| SLC25A18            | 83733 mitochondrial glutamate carrier 2                            |
| LOC653436           | 653436 LOC653436                                                   |
| dJ495O3.1           | 84969 chromosome 20 open reading frame 100                         |
| LOC283666           | 283666 LOC283666                                                   |
| DKFZP434N1511       | 54522 ankyrin repeat domain 16                                     |
| bA12D24.1.2         | 6019 prorelaxin H2                                                 |
| LAP2                | 3320 heat shock protein 90kDa alpha (cytosolic), class A member 1  |
| RGAG2               | 10687 onconeural antigen MA2                                       |
| MGC126075           | 1024 CDK8 protein kinase                                           |
| UGT2B8              | 7366 UDP-glucuronosyltransferase UGT2B15                           |
| NR3C1               | 2908 glucocorticoid receptor                                       |
| GLCLC, GLCL         | 2729 gamma-glutamylcysteine synthetase                             |
| RAI2                | 10742 retinoic acid induced 2                                      |
| RPS15P6             | 391845 ribosomal protein S15 pseudogene 6                          |
| TAFA2               | 338811 family with sequence similarity 19                          |
| NAPEPLD             | 222236 N-acyl-phosphatidylethanolamine-hydrolyzing phospholipase D |
| SRCL, CL-P1, SCARA4 | 81035 scavenger receptor class A, member 4                         |
| bA219P18.1          | 55151 transmembrane protein 38B                                    |
| NDP                 | 4693 norrin                                                        |
| TASSC               | 25934 nipsnap homolog 3A                                           |
| SCGB1D2             | 10647 lipophilin B (uteroglobin family member), prostatein-like    |
| LOC644339           | 644339 LOC644339                                                   |
| mlklak              | 51776 leucine zipper- and sterile alpha motif-containing kinase    |

## Androgen up-regulated proteins from iTRAQ study

| Symbol | Entrez_ID | Description                                                |
|--------|-----------|------------------------------------------------------------|
| STAU1  | 6780      | Isoform Long of Double-stranded RNA-binding protein        |
| EIF3M  | 10480     | Eukaryotic translation initiation factor 3, subunit M      |
| UAP1   | 6675      | Isoform AGX2 of UDP-N-acetylhexosamine pyrophosphorylase   |
| ENDOD1 | 23052     | Endonuclease domain-containing 1 protein precursor         |
| SHMT1  | 6470      | Serine hydroxymethyltransferase, cytosolic                 |
| MAP2K2 | 5605      | Dual specificity mitogen-activated protein kinase kinase 2 |
| HEBP2  | 23593     | Isoform 2 of Heme-binding protein 2                        |
| PYGB   | 5834      | Glycogen phosphorylase, brain form                         |
| SSRP1  | 6749      | FACT complex subunit SSRP1                                 |
| RPS10  | 6204      | Ribosomal protein S10                                      |
| PABPC1 | 26986     | Isoform 1 of Polyadenylate-binding protein 1               |
| ACBD3  | 64746     | Golgi resident protein GCP60                               |
| DBI    | 1622      | Diazepam binding inhibitor                                 |
| LCP1   | 3936      | Plastin-2                                                  |
| KLK3   | 354       | Prostate-specific antigen precursor                        |
| RPS3   | 6188      | 40S ribosomal protein S3                                   |
| PSMD3  | 5709      | 26S proteasome non-ATPase regulatory subunit 3             |
| AHCY   | 191       | Adenosylhomocysteinase                                     |
| PEA15  | 8682      | Astrocytic phosphoprotein PEA-15                           |
| PTGES3 | 10728     | Prostaglandin E synthase 3                                 |
| SEC23B | 10483     | Protein transport protein Sec23B                           |
| NAP1L4 | 4676      | Nucleosome assembly protein 1-like 4                       |
| FDFT1  | 2222      | Squalene synthetase                                        |
| ACLY   | 47        | ATP-citrate synthase                                       |
| UBE2L3 | 7332      | Ubiquitin-conjugating enzyme E2 L3                         |
| NDRG1  | 10397     | N-myc downstream regulated gene 1                          |
| CAPNS1 | 826       | Calpain small subunit 1                                    |
| CDC2   | 983       | Cell division cycle 2                                      |
| FASN   | 2194      | Fatty acid synthase                                        |
| AARS   | 16        | Alanyl-tRNA synthetase, cytoplasmic                        |
| RPL7   | 6129      | 60S ribosomal protein L7                                   |
| AHSA1  | 10598     | Activator of 90 kDa heat shock protein ATPase homolog 1    |
| DIAPH1 | 1729      | Protein diaphanous homolog 1                               |
| ACSL3  | 2181      | Long-chain-fatty-acid--CoA ligase 3                        |
| CSDA   | 8531      | Cold shock domain protein A                                |
| FARSLA | 2193      | Phenylalanyl-tRNA synthetase alpha chain                   |
| RPL10L | 140801    | 60S ribosomal protein L10-like                             |
| SND1   | 27044     | Staphylococcal nuclease domain-containing protein 1        |
| GPS1   | 2873      | G protein pathway suppressor 1 isoform 2                   |
| RPS26  | 6231      | Ribosomal protein S26                                      |
| PSMD12 | 5718      | 26S proteasome non-ATPase regulatory subunit 12            |
| EEF2   | 1938      | Elongation factor 2                                        |
| RPL38  | 6169      | 60S ribosomal protein L38                                  |
| SORD   | 6652      | Sorbitol dehydrogenase                                     |
| GTPBP9 | 29789     | Isoform 2 of Putative GTP-binding protein 9                |

|           |                                                             |
|-----------|-------------------------------------------------------------|
| TXN       | 7295 Thioredoxin                                            |
| RPS8      | 6202 40S ribosomal protein S8                               |
| FKBP5     | 2289 FK506-binding protein 5                                |
| PRDX6     | 9588 Peroxiredoxin-6                                        |
| YWHAG     | 7532 14-3-3 protein gamma                                   |
| RPS16     | 6217 40S ribosomal protein S16                              |
| ACAT2     | 39 Acetyl-CoA acetyltransferase, cytosolic                  |
| SRM       | 6723 Spermidine synthase                                    |
| WARS      | 7453 Tryptophanyl-tRNA synthetase, cytoplasmic              |
| COPA      | 1314 Coatamer subunit alpha                                 |
| SIL1      | 64374 Nucleotide exchange factor SIL1 precursor             |
| NAT10     | 55226 N-acetyltransferase 10                                |
| SEC31A    | 22872 SEC31 homolog A isoform 4                             |
| NARS      | 4677 Asparaginyl-tRNA synthetase, cytoplasmic               |
| TARS      | 6897 Threonyl-tRNA synthetase                               |
| C18orf32  | 497661 Chromosome 18 open reading frame 32                  |
| LOC389842 | 389842 Similar to Ran-specific GTPase-activating protein    |
| SERBP1    | 26135 Plasminogen activator inhibitor 1 RNA-binding protein |
| NOL5A     | 10528 Nucleolar protein Nop56                               |
| SERPINB6  | 5269 Serpin peptidase inhibitor, clade B, member 6          |
| GARS      | 2617 Glycyl-tRNA synthetase                                 |
| PGM2      | 55276 Phosphoglucomutase-2                                  |
| ASNS      | 440 Asparagine synthetase                                   |
| TXNL5     | 84817 Thioredoxin-like protein 5                            |
| LOC644816 | 644816 Similar to Heat shock protein HSP 90-beta            |



### Androgen down-regulated proteins from iTRAQ study

| Symbol   | Entrez_ID | Description                                                |
|----------|-----------|------------------------------------------------------------|
| HLA-C    | 3107      | HLA class I histocompatibility antigen                     |
| SNRPA    | 6626      | U1 small nuclear ribonucleoprotein A                       |
| PDCD6IP  | 10015     | PDCD6IP protein                                            |
| TIMM8A   | 1678      | Mitochondrial import inner membrane translocase            |
| NCAM2    | 4685      | Neural cell adhesion molecule 2 precursor                  |
| DPP7     | 29952     | Dipeptidyl-peptidase 2 precursor                           |
| AK3      | 50808     | GTP:AMP phosphotransferase mitochondrial                   |
| CTSD     | 1509      | Cathepsin D precursor                                      |
| FOLH1    | 2346      | Isoform PSMA-1 of Glutamate carboxypeptidase 2             |
| FLOT1    | 10211     | Flotillin-1                                                |
| DDB1     | 1642      | DNA damage-binding protein 1                               |
| MME      | 4311      | Neprilysin                                                 |
| NDUFA8   | 4702      | NADH dehydrogenase [ubiquinone]                            |
| WDR57    | 9410      | WD repeat protein 57                                       |
| C11orf58 | 10944     | Small acidic protein                                       |
| FXR2     | 9513      | Fragile X mental retardation syndrome-related protein 2    |
| RNASET2  | 8635      | Isoform 1 of Ribonuclease T2 precursor                     |
| SF3A3    | 10946     | Splicing factor 3A subunit 3                               |
| MIA3     | 375056    | similar to melanoma inhibitory activity 3 isoform 1        |
| MAP1B    | 4131      | Microtubule-associated protein 1B                          |
| TRA2A    | 29896     | Isoform Long of Transformer-2 protein homolog              |
| ATP1B1   | 481       | Isoform 1 of Sodium\potassium-transporting                 |
| PTMS     | 5763      | Parathyrosin                                               |
| ALDH2    | 217       | Aldehyde dehydrogenase, mitochondrial precursor            |
| HDGF     | 3068      | Hepatoma-derived growth factor                             |
| HNRPL    | 3191      | heterogeneous nuclear ribonucleoprotein L isoform a        |
| SUCLG1   | 8802      | succinate-CoA ligase, GDP-forming, alpha subunit           |
| SNRPE    | 6635      | Small nuclear ribonucleoprotein E                          |
| TM7SF2   | 7108      | Isoform 1 of Delta(14)-sterol reductase                    |
| ATP5J    | 522       | ATP synthase coupling factor 6, mitochondrial precursor    |
| SFRS1    | 6426      | splicing factor, arginine\serine-rich 1                    |
| SFPQ     | 6421      | Isoform Long of Splicing factor                            |
| LGMN     | 5641      | Legumain precursor                                         |
| CTNND1   | 1500      | Isoform 1AB of Catenin delta-1                             |
| PAFAH1B2 | 5049      | Platelet-activating factor acetylhydrolase IB subunit beta |
| NHP2L1   | 4809      | NHP2-like protein 1                                        |
| NONO     | 4841      | Non-POU domain-containing octamer-binding protein          |
| FUS      | 2521      | Isoform Short of RNA-binding protein FUS                   |
| DNAJB11  | 51726     | DnaJ homolog subfamily B member 11 precursor               |
