# Supplementary material for: “Topological Significance” Analysis of Gene Expression and Proteomic Profiles from Prostate Cancer Cells Reveals Key Mechanisms of Androgen Response
Source: PubMed Central journal article supplement (PMC2880599; doi:10.1371/journal.pone.0010936), 2010-06-03
Supplement: pone.0010936.s002.pdf [file pone.0010936.s002.pdf]

**Topologically significant genes determined from gene expression data**

| <b>Symbol</b> | <b>Entrez_ID</b> | <b>Description</b>                                       | <b>p value</b> | <b>percentile</b> |
|---------------|------------------|----------------------------------------------------------|----------------|-------------------|
| AAG11         | 2274             | aging-associated gene 11                                 | 2.24E-19       | 99.89605          |
| CLS           | 6197             | ribosomal protein S6 kinase, 90kDa, polypeptide 3        | 1.51E-18       | 99.84407          |
| CTNNB         | 1499             | catenin (cadherin-associated protein), beta 1, 88kDa     | 5.45E-17       | 99.74012          |
| CCND2         | 894              | cyclin D2                                                | 3.74E-16       | 99.63617          |
| FLJ21396      | 23132            | RAD54-like 2                                             | 5.26E-16       | 99.53222          |
| AIS           | 367              | androgen receptor                                        | 1.36E-15       | 99.42827          |
| DAB2          | 1601             | mitogen-responsive phosphoprotein                        | 1.55E-15       | 99.32432          |
| ABP-280       | 2316             | filamin A, alpha                                         | 3.89E-15       | 99.22037          |
| ACH           | 2261             | fibroblast growth factor receptor 3                      | 1.2E-14        | 99.11642          |
| RAD9          | 5883             | RAD9 homolog                                             | 1.31E-14       | 98.9605           |
| FLJ40346      | 144715           | RAD9 homolog B                                           | 1.31E-14       | 98.9605           |
| CMT2F         | 3315             | heat shock 27kDa protein 1                               | 1.49E-14       | 98.80457          |
| FLJ25949      | 23081            | jumonji domain containing 2C                             | 3.62E-14       | 98.64865          |
| AADC          | 1644             | dopa decarboxylase (aromatic L-amino acid decarboxylase) | 3.62E-14       | 98.64865          |
| DKFzP313L     | 2934             | gelsolin (amyloidosis, Finnish type)                     | 3.62E-14       | 98.49272          |
| AP-1          | 3725             | v-jun avian sarcoma virus 17 oncogene homolog            | 8.58E-14       | 98.38877          |
| ARH           | 26119            | LDL receptor adaptor protein                             | 9.98E-14       | 98.23285          |
| CHC           | 1213             | clathrin, heavy chain (Hc)                               | 9.98E-14       | 98.23285          |
| CD49D         | 3676             | integrin alpha 4                                         | 1.19E-13       | 98.02495          |
| CD29          | 3688             | integrin beta 1                                          | 1.19E-13       | 98.02495          |
| DBK           | 5585             | serine-threonine kinase N                                | 1.24E-13       | 97.86902          |
| DPC4          | 4089             | mothers against decapentaplegic homolog 4                | 1.48E-13       | 97.76507          |
| PAB1          | 26986            | poly(A) binding protein, cytoplasmic 1                   | 1.49E-13       | 97.66112          |
| HBO1          | 11143            | MYST histone acetyltransferase 2                         | 1.58E-13       | 97.5052           |
| DSAP1         | 9733             | squamous cell carcinoma antigen recognized by T cells 3  | 1.58E-13       | 97.5052           |
| COASTER       | 26036            | coactivator for steroid receptors                        | 1.89E-13       | 97.34927          |
| ARA24         | 5901             | ras-related nuclear protein                              | 2.01E-13       | 97.19335          |
| ITGB7         | 3695             | integrin, beta 7                                         | 2.01E-13       | 97.19335          |
| ITGA8         | 8516             | integrin, alpha 8                                        | 2.17E-13       | 96.8815           |
| HsT18964      | 22801            | integrin, alpha 11                                       | 2.17E-13       | 96.8815           |
| ITGA10        | 8515             | integrin, alpha 10                                       | 2.17E-13       | 96.8815           |
| CD49C         | 3675             | very late activation protein 3 receptor, alpha-3 subunit | 2.17E-13       | 96.8815           |
| CCNE          | 898              | cyclin Es                                                | 2.39E-13       | 96.20582          |
| RBAK          | 57786            | RB-associated KRAB zinc finger                           | 2.39E-13       | 96.20582          |
| POD1          | 6943             | transcription factor 21                                  | 2.39E-13       | 96.20582          |
| TSG10         | 7251             | tumor susceptibility gene 101                            | 2.39E-13       | 96.20582          |
| HKMT1069      | 79084            | methylosome protein 50                                   | 2.39E-13       | 96.20582          |
| BAF57         | 6605             | mammalian chromatin remodeling complex BRG1              | 2.39E-13       | 96.20582          |
| CTC75         | 2547             | ATP-dependent DNA helicase II, 70 kDa subunit            | 2.39E-13       | 96.20582          |
| ANT-1         | 24148            | U5 snRNP-associated 102 kDa protein                      | 2.39E-13       | 96.20582          |
| PAR4          | 5074             | WT1-interacting protein                                  | 2.39E-13       | 96.20582          |
| ACK           | 10188            | tyrosine kinase, non-receptor, 2                         | 2.57E-13       | 95.68607          |
| IFI16         | 3428             | interferon-gamma induced protein IFI 16                  | 3.33E-13       | 95.58212          |
| DOD           | 5300             | protein (peptidyl-prolyl cis/trans isomerase)            | 3.59E-13       | 95.47817          |
| AAG4          | 1191             | testosterone-repressed prostate message 2                | 4.31E-13       | 95.37422          |

|           |       |                                                          |          |          |
|-----------|-------|----------------------------------------------------------|----------|----------|
| HSP75     | 10131 | heat shock protein 75                                    | 4.41E-13 | 95.11435 |
| D6S182    | 3326  | heat shock 90kDa protein 1, beta                         | 4.41E-13 | 95.11435 |
| ECGP      | 7184  | heat shock protein 90kDa beta, member 1                  | 4.41E-13 | 95.11435 |
| FLJ31884  | 3320  | heat shock protein 90kDa alpha (cytosolic)               | 4.41E-13 | 95.11435 |
| FLJ31165  | 57610 | RAN binding protein 10                                   | 5.53E-13 | 94.85447 |
| GSK3B     | 2932  | glycogen synthase kinase 3 beta                          | 6.05E-13 | 94.75052 |
| HsMAD1    | 8379  | tumor protein p53 inducible protein 9                    | 6.95E-13 | 94.64657 |
| ARA160    | 7110  | TATA element modulatory factor 1                         | 7.32E-13 | 94.49064 |
| FLJ39089  | 7520  | Ku86 autoantigen related protein 1                       | 7.32E-13 | 94.49064 |
| GGA1      | 26088 | gamma-adaptin related protein 1                          | 9.55E-13 | 94.33472 |
| HIP1      | 3092  | huntingtin interacting protein 1                         | 9.8E-13  | 94.23077 |
| G3PD      | 2597  | glyceraldehyde 3-phosphate dehydrogenase                 | 1.04E-12 | 94.12682 |
| ALPHA-RLC | 3680  | integrin, alpha 4-like                                   | 1.23E-12 | 94.02287 |
| BGP       | 634   | biliary glycoprotein adhesion molecule                   | 1.39E-12 | 93.91892 |
| CALR      | 811   | Sicca syndrome antigen A (autoantigen Ro; calreticulin)  | 1.46E-12 | 93.65904 |
| C1Q-C     | 714   | complement component 1, q subcomponent, C chain          | 1.46E-12 | 93.65904 |
| C1QB      | 713   | complement component 1, q subcomponent                   | 1.46E-12 | 93.65904 |
| C1QA      | 712   | complement component C1q, A chain                        | 1.46E-12 | 93.65904 |
| ELAV1     | 1994  | Hu antigen R                                             | 1.67E-12 | 93.39917 |
| MER       | 10461 | STK kinase                                               | 1.67E-12 | 93.29522 |
| CASP1     | 834   | caspase 1                                                | 1.67E-12 | 93.19127 |
| DKFZP586J | 51564 | histone deacetylase 7A                                   | 1.74E-12 | 93.08732 |
| KIAA0093  | 4734  | neural precursor cell expressed                          | 1.86E-12 | 92.98337 |
| AMPK      | 5563  | AMP-activated protein kinase alpha 2 catalytic subunit   | 2.01E-12 | 92.82744 |
| AMPK      | 5562  | AMPK alpha 1                                             | 2.01E-12 | 92.82744 |
| INPP5F    | 4952  | oculocerebrorenal syndrome of Lowe                       | 2.51E-12 | 92.67152 |
| CSBP1     | 1432  | stress-activated protein kinase 2A                       | 2.56E-12 | 92.56757 |
| BRCA2     | 675   | breast cancer susceptibility protein BRCA2               | 2.59E-12 | 92.46362 |
| CAV       | 857   | caveolin 1 caveolae protein, 22kD                        | 2.9E-12  | 92.35967 |
| CCND3     | 896   | G1/S-specific cyclin D3                                  | 3E-12    | 92.25572 |
| APOB      | 338   | apolipoprotein B48                                       | 3.16E-12 | 92.15177 |
| FLJ25220  | 3679  | integrin alpha 7                                         | 3.68E-12 | 92.04782 |
| SENP1     | 29843 | SUMO1/sentrin specific protease 1                        | 4.32E-12 | 91.94387 |
| ADPRT     | 142   | poly (ADP-ribose) polymerase family, member 1            | 5.98E-12 | 91.83992 |
| CALM2     | 805   | LP7057 protein                                           | 6.3E-12  | 91.63202 |
| CALM1     | 801   | calmodulin 1 (phosphorylase kinase, delta)               | 6.3E-12  | 91.63202 |
| CALM3     | 808   | calmodulin 3 (phosphorylase kinase, delta)               | 6.3E-12  | 91.63202 |
| B-MYB     | 4605  | v-myb avian myeloblastosis viral oncogene homolog-like 2 | 6.7E-12  | 91.42412 |
| CHC1      | 1104  | regulator of chromosome condensation 1                   | 6.99E-12 | 91.32017 |
| APRF      | 6774  | DNA-binding protein APRF                                 | 1.08E-11 | 91.21622 |
| DJ-1      | 11315 | protein DJ-1                                             | 1.43E-11 | 91.11227 |
| DKFZp686f | 3065  | histone deacetylase 1                                    | 1.44E-11 | 91.00832 |
| AOF2      | 23028 | lysine (K)-specific demethylase 1                        | 1.44E-11 | 90.90437 |
| DKFZp781f | 4914  | neurotrophic tyrosine kinase, receptor, type 1           | 1.64E-11 | 90.80042 |
| ARA55     | 7041  | transforming growth factor beta 1 induced transcript 1   | 1.85E-11 | 90.69647 |
| COLEC1    | 4153  | mannose-binding protein C                                | 1.85E-11 | 90.59252 |
| AZAMP     | 566   | cationic antimicrobial protein 37                        | 2.41E-11 | 90.48857 |

|             |        |                                                             |          |          |
|-------------|--------|-------------------------------------------------------------|----------|----------|
| AMCBX1      | 8517   | incontinentia pigmenti                                      | 2.72E-11 | 90.38462 |
| HIRS-1      | 3667   | insulin receptor substrate 1                                | 2.82E-11 | 90.28067 |
| DKFZp686C   | 5796   | protein tyrosine phosphatase, receptor type, K              | 3E-11    | 90.17672 |
| BFGF        | 2247   | prostatropin                                                | 3.02E-11 | 90.07277 |
| CD340       | 2064   | v-erb-b2 avian erythroblastic leukemia viral oncogene       | 3.51E-11 | 89.96881 |
| AP-1        | 2353   | cellular oncogene c-fos                                     | 3.88E-11 | 89.86486 |
| FINB        | 6239   | zinc finger motif enhancer binding protein 1                | 4.17E-11 | 89.76091 |
| CDC37       | 11140  | cell division cycle 37 protein                              | 4.47E-11 | 89.65696 |
| FLJ23903    | 4641   | nuclear myosin I                                            | 4.65E-11 | 89.55301 |
| CDC2        | 983    | cell cycle controller CDC2                                  | 4.8E-11  | 89.44906 |
| BGN         | 633    | biglycan proteoglycan                                       | 5.41E-11 | 89.34511 |
| ACLS        | 2737   | GLI-Kruppel family member GLI3                              | 6.32E-11 | 89.24116 |
| MSP23       | 5052   | peroxiredoxin 1                                             | 6.43E-11 | 89.13721 |
| AF6q21      | 2309   | forkhead, Drosophila                                        | 6.83E-11 | 89.03326 |
| FOXA1       | 3169   | hepatocyte nuclear factor 3, alpha                          | 8.46E-11 | 88.92931 |
| DDR2        | 4921   | cell migration-inducing protein 20                          | 8.64E-11 | 88.77339 |
| ASV         | 6714   | tyrosine kinase pp60c-src                                   | 8.64E-11 | 88.77339 |
| ALPS2B      | 841    | cysteine protease                                           | 9.82E-11 | 88.61746 |
| BAG1        | 573    | BCL2-associated athanogene                                  | 1E-10    | 88.51351 |
| Cmyb        | 4602   | c-myb13A_CDS                                                | 1.01E-10 | 88.40956 |
| INSRR       | 3645   | IR-related receptor                                         | 1.11E-10 | 88.30561 |
| FLJ20408    | 3280   | transcription factor HES-1                                  | 1.16E-10 | 88.20166 |
| STAT5       | 6777   | transcription factor STAT5B                                 | 1.16E-10 | 88.09771 |
| ARNIP       | 25898  | androgen-receptor N-terminal-interacting protein            | 1.2E-10  | 87.99376 |
| DKFZp761F   | 221037 | jumonji domain containing 1C                                | 1.38E-10 | 87.88981 |
| FKBP5       | 2289   | rotamase                                                    | 1.4E-10  | 87.78586 |
| MYC         | 4609   | myc proto-oncogene protein                                  | 1.8E-10  | 87.68191 |
| CSBP        | 3190   | transformation upregulated nuclear protein                  | 3.09E-10 | 87.57796 |
| CANP        | 823    | calpain 1, large subunit                                    | 3.26E-10 | 87.47401 |
| OSRC        | 5925   | retinoblastoma-1                                            | 3.4E-10  | 87.37006 |
| BSP1        | 4086   | MAD, mothers against decapentaplegic homolog 1              | 3.79E-10 | 87.26611 |
| BR          | 3673   | platelet antigen Br                                         | 4.15E-10 | 87.16216 |
| BAF155      | 6599   | chromatin remodeling complex BAF155 subunit                 | 4.18E-10 | 87.05821 |
| AKT3        | 10000  | v-akt murine thymoma viral oncogene homolog 3               | 4.24E-10 | 86.85031 |
| AKT         | 207    | protein kinase B                                            | 4.24E-10 | 86.85031 |
| AKT2        | 208    | v-akt murine thymoma viral oncogene homolog 2               | 4.24E-10 | 86.85031 |
| ARH6        | 388    | oncogene RHO H6                                             | 4.32E-10 | 86.64241 |
| SRY         | 6736   | testis-determining factor                                   | 4.61E-10 | 86.53846 |
| C4orf1      | 10463  | chromosome 4 open reading frame 1                           | 4.69E-10 | 86.43451 |
| CREB        | 1385   | cAMP responsive element binding protein 1                   | 4.82E-10 | 86.33056 |
| FLJ26459    | 5934   | retinoblastoma-like 2 (p130)                                | 5.75E-10 | 86.22661 |
| C/EBP-alpha | 1050   | CCAAT/enhancer binding protein alpha                        | 5.86E-10 | 86.12266 |
| AC068139.   | 6435   | surfactant, pulmonary-associated protein A1B                | 6.13E-10 | 86.01871 |
| FH          | 3949   | low density lipoprotein receptor                            | 7.47E-10 | 85.91476 |
| CD49e       | 3678   | integrin, alpha 5 (fibronectin receptor, alpha polypeptide) | 7.96E-10 | 85.81081 |
| ASK1        | 4217   | MAPK/ERK kinase kinase 5                                    | 8.3E-10  | 85.70686 |
| HPTPZ       | 5803   | protein tyrosine phosphatase, receptor-type                 | 1.04E-09 | 85.60291 |

|            |                                                             |          |          |
|------------|-------------------------------------------------------------|----------|----------|
| A2MR       | 4035 type V tgf-beta receptor                               | 1.19E-09 | 85.49896 |
| AWD        | 4830 NDP kinase A                                           | 1.45E-09 | 85.39501 |
| ARH12      | 387 oncogene RHO H12                                        | 1.46E-09 | 85.29106 |
| ARA70      | 8031 nuclear receptor coactivator 4                         | 1.5E-09  | 85.18711 |
| DIAPH3     | 81624 diaphanous homolog 3                                  | 1.51E-09 | 85.08316 |
| MAP3K7     | 6885 transforming growth factor-beta-activated kinase 1     | 1.55E-09 | 84.97921 |
| FLJ13161   | 26524 serine/threonine kinase KPM                           | 1.58E-09 | 84.87526 |
| MAX        | 4149 MAX protein                                            | 1.85E-09 | 84.77131 |
| CR         | 6997 teratocarcinoma-derived growth factor 1                | 1.94E-09 | 84.66736 |
| DKFZp686A  | 3146 high-mobility group (nonhistone chromosomal) protein 1 | 1.98E-09 | 84.51143 |
| HMG2       | 3148 high-mobility group box 2                              | 1.98E-09 | 84.51143 |
| CKBBP2     | 90480 papillomavirus L2 interacting nuclear protein 1       | 2.04E-09 | 84.35551 |
| FLJ16239   | 10013 histone deacetylase 6                                 | 2.38E-09 | 84.25156 |
| DKFZp434K  | 7442 transient receptor potential vanilloid 1b              | 2.43E-09 | 84.14761 |
| KIAA0988   | 6904 tubulin-specific chaperone d                           | 2.49E-09 | 84.04366 |
| BID        | 637 BID isoform Si6                                         | 2.65E-09 | 83.93971 |
| ON         | 6678 secreted protein, acidic, cysteine-rich                | 2.72E-09 | 83.83576 |
| DLG4       | 1742 synapse-associated protein 90                          | 2.98E-09 | 83.73181 |
| HMX3       | 27043 proline and glutamic acid rich nuclear protein        | 3.18E-09 | 83.62786 |
| RAB6B      | 51560 small GTP-binding protein                             | 3.25E-09 | 83.47193 |
| RAB6       | 5870 RAB6, member RAS oncogene family                       | 3.25E-09 | 83.47193 |
| BCL1       | 595 G1/S-specific cyclin D1                                 | 3.35E-09 | 83.31601 |
| DJBP       | 64800 EF-hand calcium binding domain 6                      | 3.47E-09 | 83.21206 |
| E2F-1      | 1869 retinoblastoma-associated protein 1                    | 3.98E-09 | 83.10811 |
| ART-27     | 8409 ubiquitously-expressed transcript                      | 4.17E-09 | 83.00416 |
| DDX5       | 1655 DEAD (Asp-Glu-Ala-Asp) box polypeptide 5               | 4.37E-09 | 82.90021 |
| BHLHb31    | 23462 hairy-related transcription factor 1                  | 4.83E-09 | 82.79626 |
| FKHL13     | 2302 forkhead box J1                                        | 4.89E-09 | 82.69231 |
| FLJ26504   | 6464 SHC transforming protein 1                             | 5.05E-09 | 82.58836 |
| PLK        | 5347 polo like kinase                                       | 5.65E-09 | 82.48441 |
| CD49a      | 3672 very late activation protein 1                         | 5.75E-09 | 82.38046 |
| SNAPAP     | 23557 SNARE associated protein snapin                       | 6.17E-09 | 82.27651 |
| MGC10268   | 9063 protein inhibitor of activated STAT X                  | 6.58E-09 | 82.17256 |
| CAF        | 8850 CREBBP-associated factor                               | 7.03E-09 | 82.06861 |
| BETA-TRCP  | 8945 beta-TrCP1                                             | 7.36E-09 | 81.96466 |
| ATF4       | 468 activating transcription factor 4                       | 8.76E-09 | 81.86071 |
| HIF-1alpha | 3091 member of PAS superfamily 1                            | 8.78E-09 | 81.75676 |
| RAC3       | 5881 ras-related C3 botulinum toxin substrate 3             | 8.83E-09 | 81.65281 |
| CMTDI1     | 1785 cytoskeletal protein                                   | 9.19E-09 | 81.54886 |
| ADRB2      | 154 catecholamine receptor                                  | 9.99E-09 | 81.44491 |
| TOP2       | 7153 DNA topoisomerase II, alpha isozyme                    | 1.04E-08 | 81.34096 |
| BCL2       | 596 B-cell CLL/lymphoma 2                                   | 1.05E-08 | 81.23701 |
| DAPK3      | 1613 ZIP kinase isoform                                     | 1.13E-08 | 81.13306 |
| MGC786     | 5518 protein phosphatase 2 (formerly 2A), alpha isoform     | 1.13E-08 | 81.02911 |
| DKFZp686C  | 4790 nuclear factor kappa-B, subunit 1                      | 1.25E-08 | 80.92516 |
| CNK        | 10256 connector enhancer of kinase suppressor of Ras 1      | 1.26E-08 | 80.82121 |
| HPE4       | 7050 transforming growth factor-beta-induced factor         | 1.27E-08 | 80.71726 |

|            |        |                                                             |          |          |
|------------|--------|-------------------------------------------------------------|----------|----------|
| CRS2       | 4488   | msh homeobox 2                                              | 1.48E-08 | 80.61331 |
| GNA-11     | 2767   | guanine nucleotide-binding protein, Gq class, GNA11         | 1.53E-08 | 80.45738 |
| G-ALPHA-q  | 2776   | guanine nucleotide binding protein (G protein)              | 1.53E-08 | 80.45738 |
| GPIPLD     | 2822   | GPI-specific phospholipase D                                | 1.76E-08 | 80.30146 |
| GLI2       | 2736   | zinc finger protein GLI2                                    | 1.86E-08 | 80.19751 |
| CHNG1      | 7253   | thyroid stimulating hormone receptor                        | 1.89E-08 | 80.09356 |
| GLI        | 2735   | glioma-associated oncogene homolog (zinc finger protein)    | 2.02E-08 | 79.9896  |
| BSAP       | 5079   | B-cell lineage specific activator                           | 2.15E-08 | 79.88565 |
| NR2C1      | 7181   | orphan nuclear receptor TR2                                 | 2.33E-08 | 79.7817  |
| ARR3       | 407    | cone arrestin                                               | 2.36E-08 | 79.67775 |
| D12S1644   | 6778   | signal transducer and activator of transcription 6          | 2.38E-08 | 79.5738  |
| DELTA1     | 28514  | delta-like 1                                                | 2.58E-08 | 79.46985 |
| BZS        | 5728   | MMAC1 phosphatase and tensin homolog                        | 2.71E-08 | 79.3659  |
| C-Rel      | 5966   | v-rel reticuloendotheliosis viral oncogene homolog          | 2.8E-08  | 79.26195 |
| PAK5       | 56924  | p21-activated protein kinase 6                              | 2.92E-08 | 79.158   |
| CD61       | 3690   | integrin, beta 3 (platelet glycoprotein IIIa, antigen CD61) | 3.12E-08 | 79.05405 |
| HSSOX6     | 55553  | SRY-box containing gene 6                                   | 3.13E-08 | 78.9501  |
| ACTRIB     | 91     | serine(threonine) protein kinase receptor R2                | 3.24E-08 | 78.84615 |
| MAP3K11    | 4296   | mitogen-activated protein kinase kinase kinase 11           | 3.48E-08 | 78.7422  |
| CDC25B     | 994    | cell division cycle 25 homolog B                            | 3.75E-08 | 78.63825 |
| AT225      | 1958   | zinc finger protein 225                                     | 3.83E-08 | 78.5343  |
| PRO1280    | 51684  | suppressor of fused homolog (Drosophila)                    | 4.05E-08 | 78.43035 |
| MGC13177   | 5970   | v-rel avian reticuloendotheliosis viral oncogene homolog A  | 4.1E-08  | 78.3264  |
| MAGI-3     | 260425 | membrane-associated guanylate kinase-related 3              | 4.24E-08 | 78.22245 |
| PI5        | 5268   | serpin peptidase inhibitor, clade B (ovalbumin), member 5   | 4.28E-08 | 78.1185  |
| ACVRLK3    | 657    | bone morphogenetic protein receptor, type IA                | 4.33E-08 | 78.01455 |
| ANFH       | 1280   | collagen II, alpha-1 polypeptide                            | 4.59E-08 | 77.9106  |
| FAST-1     | 8928   | Human homolog of Xenopus forkhead activin                   | 4.7E-08  | 77.80665 |
| MMP-X1     | 4323   | membrane-type matrix metalloproteinase 1                    | 5.28E-08 | 77.7027  |
| Bp50       | 958    | CD40 type II isoform                                        | 5.45E-08 | 77.59875 |
| DKFZp781E  | 7018   | transferrin                                                 | 5.46E-08 | 77.44283 |
| SREBF1     | 6720   | sterol regulatory element binding transcription factor 1    | 5.46E-08 | 77.44283 |
| N-syndecar | 9672   | syndecan proteoglycan 3                                     | 5.52E-08 | 77.2869  |
| PKC-MU     | 5587   | protein kinase D1                                           | 5.54E-08 | 77.18295 |
| CLTA       | 1211   | clathrin, light polypeptide A                               | 5.62E-08 | 77.02703 |
| CLTB       | 1212   | clathrin, light polypeptide                                 | 5.62E-08 | 77.02703 |
| CD28       | 940    | CD28 antigen (Tp44)                                         | 6.24E-08 | 76.8711  |
| AAT5       | 7046   | transforming growth factor beta receptor I                  | 6.6E-08  | 76.76715 |
| BCAR1      | 9564   | Cas scaffolding protein family member 1                     | 6.87E-08 | 76.6632  |
| MGC:3310   | 7189   | TNF receptor-associated factor 6                            | 6.95E-08 | 76.55925 |
| FOG        | 161882 | friend of GATA-1                                            | 7.21E-08 | 76.4553  |
| ASCR       | 5621   | prion protein                                               | 7.47E-08 | 76.35135 |
| C-Kit      | 3815   | mast/stem cell growth factor receptor                       | 7.58E-08 | 76.2474  |
| CRCS3      | 4092   | SMAD family member 7                                        | 7.82E-08 | 76.14345 |
| CD44       | 960    | chondroitin sulfate proteoglycan 8                          | 8.87E-08 | 76.0395  |
| BRCA1      | 672    | breast and ovarian cancer susceptibility protein 1          | 1.04E-07 | 75.93555 |
| MGC12632   | 4593   | skeletal muscle receptor tyrosine kinase                    | 1.04E-07 | 75.77963 |

|           |                                                               |          |          |
|-----------|---------------------------------------------------------------|----------|----------|
| KIAA0816  | 4038 low-density lipoprotein receptor-related protein 4       | 1.04E-07 | 75.77963 |
| BNSP      | 6696 SPP1/CALPHA1 fusion                                      | 1.06E-07 | 75.6237  |
| CIS1      | 8651 STAT induced SH3 protein 1                               | 1.07E-07 | 75.51975 |
| AXL       | 558 AXL transforming sequence/gene                            | 1.08E-07 | 75.4158  |
| PS6K      | 6198 serine/threonine kinase 14 alpha                         | 1.14E-07 | 75.31185 |
| CD126     | 3570 interleukin 6 receptor alpha subunit                     | 1.15E-07 | 75.15593 |
| CD130     | 3572 CD130 antigen                                            | 1.15E-07 | 75.15593 |
| BLIMP1    | 639 beta-interferon gene positive-regulatory domain I binding | 1.29E-07 | 75       |
| FADD      | 8772 Fas-associating death domain-containing protein          | 1.3E-07  | 74.89605 |
| ADABP     | 1803 dipeptidylpeptidase IV                                   | 1.34E-07 | 74.7921  |
| FLJ10671  | 8295 350/400 kDa PCAF-associated factor                       | 1.36E-07 | 74.68815 |
| ACTRI     | 90 activin A receptor, type II-like kinase 2                  | 1.41E-07 | 74.5842  |
| Arc-1     | 999 cell-CAM 120/80                                           | 1.45E-07 | 74.48025 |
| ARNTL     | 406 basic-helix-loop-helix-PAS orphan MOP3                    | 1.48E-07 | 74.3763  |
| EBP1      | 5036 cell cycle protein p38-2G4 homolog                       | 1.51E-07 | 74.27235 |
| GRIN2A    | 2903 NMDA receptor subtype 2A                                 | 1.53E-07 | 74.1684  |
| CALN      | 5530 protein phosphatase 3, catalytic subunit, alpha isoform  | 1.56E-07 | 73.9605  |
| CALNA3    | 5533 protein phosphatase 3 (formerly 2B), catalytic subunit   | 1.56E-07 | 73.9605  |
| CALNA2    | 5532 calcineurin A beta                                       | 1.56E-07 | 73.9605  |
| MGC13823  | 4838 nodal, mouse, homolog                                    | 1.56E-07 | 73.7526  |
| HDM2, HDI | 4193 p53-binding protein MDM2                                 | 1.58E-07 | 73.64865 |
| CAS3      | 10278 Cas scaffolding protein family member 3                 | 1.63E-07 | 73.49272 |
| IMD2      | 7454 Wiskott-Aldrich syndrome protein                         | 1.63E-07 | 73.49272 |
| HDLCQ11   | 4023 lipoprotein lipase                                       | 1.77E-07 | 73.3368  |
| MGC10283  | 5566 protein kinase A catalytic subunit                       | 1.77E-07 | 73.1289  |
| KAPG      | 5568 PKA C-gamma                                              | 1.77E-07 | 73.1289  |
| DKFZp781I | 5567 PKA C-beta                                               | 1.77E-07 | 73.1289  |
| PMEPA1    | 56937 transmembrane prostate androgen-induced protein         | 1.91E-07 | 72.921   |
| CD41      | 3674 integrin alpha 2b                                        | 1.97E-07 | 72.81705 |
| CSK       | 1445 c-src tyrosine kinase                                    | 1.99E-07 | 72.7131  |
| CD51      | 3685 integrin alpha-V                                         | 2E-07    | 72.60915 |
| FLJ00380  | 4779 transcription factor 11 (basic leucine zipper type)      | 2.06E-07 | 72.5052  |
| CRSP1     | 5469 vitamin D receptor-interacting protein complex component | 2.06E-07 | 72.40125 |
| BCL10     | 8915 CARD-like apoptotic protein                              | 2.06E-07 | 72.2973  |
| ESG       | 7088 enhancer of split groucho 1                              | 2.13E-07 | 72.19335 |
| ESA1      | 10524 cPLA2 interacting protein                               | 2.26E-07 | 72.0894  |
| FSHR      | 2492 follicle stimulating hormone receptor                    | 2.28E-07 | 71.98545 |
| MGC11098  | 6622 non A4 component of amyloid                              | 2.29E-07 | 71.8815  |
| PUR-ALPH/ | 5813 purine-rich single-stranded DNA-binding protein alpha    | 2.45E-07 | 71.77755 |
| FLJ10538  | 10765 retinoblastoma-binding protein 2, homolog 1A            | 2.46E-07 | 71.6736  |
| CIG       | 2335 fibronectin 1                                            | 2.46E-07 | 71.56965 |
| HU-2      | 6196 ribosomal protein S6 kinase alpha 2                      | 2.6E-07  | 71.4657  |
| ADAM15    | 8751 metargidin                                               | 2.69E-07 | 71.36175 |
| FHL3      | 2275 LIM-only protein FHL3                                    | 2.71E-07 | 71.20582 |
| HU-1      | 6195 dJ590P13.1 (ribosomal protein S6 kinase, 90kD)           | 2.71E-07 | 71.20582 |
| ZNF189    | 7743 zinc finger protein 189                                  | 2.71E-07 | 71.0499  |
| DKFZp781F | 5325 PLAG-like 1                                              | 2.81E-07 | 70.94595 |

|           |                                                                   |          |          |
|-----------|-------------------------------------------------------------------|----------|----------|
| GUD       | 7490 Wilms tumor 1                                                | 3.04E-07 | 70.842   |
| ANX2      | 302 lipocortin II                                                 | 3.08E-07 | 70.73805 |
| AATF      | 26574 apoptosis antagonizing transcription factor                 | 3.13E-07 | 70.6341  |
| CP107     | 5933 retinoblastoma-like 1 (p107)                                 | 3.13E-07 | 70.53015 |
| MGF       | 6776 signal transducer and activator of transcription 5A          | 3.17E-07 | 70.4262  |
| CDHF12    | 5979 ret proto-oncogene (multiple endocrine neoplasia)            | 3.48E-07 | 70.32225 |
| CDK6      | 1021 cell division protein kinase 6                               | 3.49E-07 | 70.2183  |
| COL3A1    | 1281 collagen, fetal                                              | 3.58E-07 | 70.11435 |
| CD222     | 3482 cation-independent mannose-6 phosphate receptor              | 3.67E-07 | 70.0104  |
| GFRP1     | 3164 hormone receptor                                             | 3.77E-07 | 69.90644 |
| CD140A    | 5156 platelet-derived growth factor receptor, alpha polypeptide   | 3.82E-07 | 69.75052 |
| CD140B    | 5159 platelet-derived growth factor receptor beta                 | 3.82E-07 | 69.75052 |
| MAD2      | 4601 Max-related transcription factor                             | 3.87E-07 | 69.59459 |
| GCN5      | 2648 GCN5 general control of amino-acid synthesis 5-like 2        | 4.28E-07 | 69.49064 |
| POMP100   | 6421 polypyrimidine tract-binding protein-associated splicing     | 4.35E-07 | 69.38669 |
| CADTK     | 2185 proline-rich tyrosine kinase 2                               | 4.43E-07 | 69.28274 |
| CD90      | 7070 Thy-1 membrane glycoprotein precursor variant 2              | 4.47E-07 | 69.17879 |
| GTF2D     | 6908 TATA box binding protein                                     | 4.5E-07  | 69.07484 |
| KIAA1047  | 9611 nuclear receptor co-repressor 1                              | 4.57E-07 | 68.97089 |
| DRIP5     | 54386 telomeric repeat binding factor 2, interacting protein      | 4.66E-07 | 68.86694 |
| CD221     | 3480 insulin-like growth factor 1 receptor                        | 4.86E-07 | 68.76299 |
| CD209     | 30835 C-type lectin domain family 4, member L                     | 5.03E-07 | 68.65904 |
| BRN1      | 5455 POU domain class 3, transcription factor 3                   | 5.05E-07 | 68.55509 |
| SP1       | 6667 Sp1 transcription factor                                     | 5.09E-07 | 68.45114 |
| ANF       | 8820 homeobox, ES cell expressed 1                                | 5.22E-07 | 68.34719 |
| CBP35     | 3958 galectin-3 internal                                          | 5.51E-07 | 68.24324 |
| ERK       | 5594 protein tyrosine kinase ERK2                                 | 5.91E-07 | 68.13929 |
| AHC       | 190 nuclear receptor subfamily 0, group B, member 1               | 6.24E-07 | 68.03534 |
| CCL3      | 6348 small inducible cytokine A3 (homologous to mouse Mip-1a)     | 6.41E-07 | 67.87942 |
| CC-CKR-5  | 1234 chemokine receptor CCR5                                      | 6.41E-07 | 67.87942 |
| D11S636   | 7536 splicing factor 1                                            | 6.46E-07 | 67.72349 |
| CORD2     | 1406 cone-rod homeobox                                            | 6.55E-07 | 67.61954 |
| DKFZp434k | 25942 transcriptional regulator, SIN3A                            | 6.64E-07 | 67.51559 |
| MGC41878  | 5579 protein kinase C, beta 1                                     | 6.75E-07 | 67.41164 |
| FLJ40509  | 3551 inhibitor of kappa light polypeptide gene enhancer in B-cell | 6.98E-07 | 67.30769 |
| HSF1      | 3297 heat shock transcription factor 1                            | 7.42E-07 | 67.20374 |
| CD217     | 23765 interleukin 17 receptor A                                   | 7.47E-07 | 67.04782 |
| FLJ95963  | 84818 interleukin 17 receptor-like                                | 7.47E-07 | 67.04782 |
| FLJ42306  | 5494 protein phosphatase 1A                                       | 7.56E-07 | 66.89189 |
| CARD4     | 10392 caspase recruitment domain family, member 4                 | 7.76E-07 | 66.78794 |
| DAPK      | 1612 death-associated protein kinase 1                            | 8.16E-07 | 66.63202 |
| DKFZp686E | 4131 microtubule-associated protein 1B                            | 8.16E-07 | 66.63202 |
| DKFZp686C | 2775 guanine nucleotide binding protein (G protein)               | 8.27E-07 | 66.21622 |
| GNAZ      | 2781 guanine nucleotide binding protein (G protein)               | 8.27E-07 | 66.21622 |
| 87U6      | 2773 guanine nucleotide binding protein (G protein)               | 8.27E-07 | 66.21622 |
| GNAI1     | 2770 Gi1 protein alpha subunit                                    | 8.27E-07 | 66.21622 |
| GIP       | 2771 guanine nucleotide binding protein (G protein)               | 8.27E-07 | 66.21622 |

|          |       |                                                              |          |          |
|----------|-------|--------------------------------------------------------------|----------|----------|
| AHO      | 2778  | guanine nucleotide binding protein (G protein)               | 8.27E-07 | 66.21622 |
| SGK      | 6446  | serum/glucocorticoid regulated kinase 1                      | 8.29E-07 | 65.85239 |
| CCNB2    | 9133  | cyclin B2                                                    | 8.35E-07 | 65.69647 |
| CDC25    | 995   | m-phase inducer phosphatase 3                                | 8.35E-07 | 65.69647 |
| GNB2L1   | 10399 | proliferation-inducing gene 21                               | 8.54E-07 | 65.54054 |
| CD124    | 3566  | interleukin-4 receptor alpha chain                           | 8.54E-07 | 65.38462 |
| CD132    | 3561  | common cytokine receptor gamma chain                         | 8.54E-07 | 65.38462 |
| 1-May    | 5580  | protein kinase C, delta                                      | 8.58E-07 | 65.22869 |
| BAPX2    | 4824  | NK3 homeobox 1                                               | 8.95E-07 | 65.12474 |
| B23      | 4869  | nucleophosmin 1                                              | 9.36E-07 | 65.02079 |
| CCNB     | 891   | G2/mitotic-specific cyclin B1                                | 9.43E-07 | 64.91684 |
| CD66D    | 1084  | nonspecific cross-reacting antigen                           | 9.94E-07 | 64.81289 |
| HEP-NOS  | 4843  | nitric oxide synthase, macrophage                            | 1.06E-06 | 64.70894 |
| GIG8     | 3398  | cell growth-inhibiting gene 8                                | 1.08E-06 | 64.60499 |
| MAP2K1   | 5604  | protein kinase, mitogen-activated, kinase 1                  | 1.08E-06 | 64.50104 |
| AUTS9    | 4233  | scatter factor receptor                                      | 1.09E-06 | 64.39709 |
| FYN      | 2534  | src-like kinase                                              | 1.15E-06 | 64.29314 |
| BTPP3    | 5781  | protein tyrosine phosphatase, non-receptor type 11           | 1.15E-06 | 64.18919 |
| MGC2237  | 5465  | peroxisome proliferator-activated receptor alpha             | 1.29E-06 | 64.08524 |
| CLN10    | 1509  | cathepsin D                                                  | 1.3E-06  | 63.98129 |
| FLJ16691 | 5829  | paxillin                                                     | 1.32E-06 | 63.87734 |
| HCK      | 3055  | hemopoietic cell kinase                                      | 1.35E-06 | 63.77339 |
| ACTR     | 8202  | CBP-interacting protein                                      | 1.36E-06 | 63.66944 |
| CM-AVM   | 5921  | GTPase activating protein                                    | 1.38E-06 | 63.56549 |
| CDK8     | 1024  | CDK8 protein kinase                                          | 1.45E-06 | 63.46154 |
| MGC12610 | 4314  | matrix metalloproteinase 3                                   | 1.46E-06 | 63.35759 |
| BCL2L3   | 4170  | induced myeloid leukemia cell differentiation protein        | 1.48E-06 | 63.25364 |
| CTF      | 4782  | CCAAT-binding transcription factor                           | 1.51E-06 | 63.14969 |
| CEP52    | 7311  | ubiquitin-52 amino acid fusion protein                       | 1.51E-06 | 62.99376 |
| FLJ25987 | 7314  | polyubiquitin B                                              | 1.51E-06 | 62.99376 |
| CAMK4    | 814   | CAM kinase IV                                                | 1.54E-06 | 62.83784 |
| AGMX1    | 695   | dominant-negative kinase-deficient Brutons tyrosine          | 1.64E-06 | 62.73389 |
| HSPG     | 6383  | heparan sulfate proteoglycan core protein                    | 1.68E-06 | 62.62994 |
| CDC14A   | 8556  | CDC14 homolog A                                              | 1.69E-06 | 62.52599 |
| MAD7     | 6945  | transcription factor-like 4                                  | 1.93E-06 | 62.42204 |
| I-REL    | 5971  | v-rel avian reticuloendotheliosis viral oncogene homolog B   | 1.94E-06 | 62.31809 |
| BMP7     | 655   | osteogenic protein 1                                         | 2.03E-06 | 62.21414 |
| BMP2     | 650   | bone morphogenetic protein 2                                 | 2.07E-06 | 62.05821 |
| BMP6     | 654   | bone morphogenetic protein 6                                 | 2.07E-06 | 62.05821 |
| CRTC1    | 23373 | transducer of regulated cAMP response element-binding        | 2.11E-06 | 61.90229 |
| NR0B2    | 8431  | short heterodimer partner                                    | 2.21E-06 | 61.79834 |
| CCS-3    | 1915  | translation elongation factor 1 alpha 1-like 14              | 2.22E-06 | 61.69439 |
| CDK4     | 1019  | cyclin-dependent kinase 4                                    | 2.35E-06 | 61.59044 |
| EMC19    | 6500  | transcription elongation factor B (SIII), polypeptide 1-like | 2.4E-06  | 61.48649 |
| NRIP1    | 8204  | receptor interacting protein 140                             | 2.44E-06 | 61.38254 |
| MGC12651 | 5588  | protein kinase C, theta                                      | 2.45E-06 | 61.27859 |
| AP-1     | 3726  | activator protein 1                                          | 2.48E-06 | 61.17464 |



|           |       |                                                           |          |          |
|-----------|-------|-----------------------------------------------------------|----------|----------|
| CAML1     | 3897  | neural cell adhesion molecule L1                          | 2.58E-06 | 61.07069 |
| ACT2      | 6351  | lymphocyte-activation gene 1                              | 2.68E-06 | 60.96674 |
| ACP1      | 52    | red cell acid phosphatase 1                               | 2.79E-06 | 60.86279 |
| C-2k      | 1025  | cell division protein kinase 9                            | 2.8E-06  | 60.75884 |
| AMPH2     | 274   | bridging integrator 1                                     | 2.88E-06 | 60.65489 |
| FLJ22252  | 64321 | SRY (sex determining region Y)-box 17                     | 2.89E-06 | 60.55094 |
| FLJ25655  | 5885  | nuclear matrix protein 1                                  | 2.93E-06 | 60.44699 |
| FLT4      | 2324  | fms-related tyrosine kinase 4                             | 2.93E-06 | 60.34304 |
| SIR2L1    | 23411 | silent mating type information regulation 2 homolog       | 3.03E-06 | 60.23909 |
| DKFZp686C | 8848  | transforming growth factor beta-stimulated protein TSC-22 | 3.23E-06 | 60.13514 |
| AAG6      | 5578  | aging-associated gene 6                                   | 3.28E-06 | 60.03119 |
| RES4-26   | 6047  | small nuclear RING finger protein                         | 3.54E-06 | 59.92723 |
| KPD       | 5078  | paired box gene 4                                         | 3.55E-06 | 59.82328 |
| BMP5      | 653   | bone morphogenetic protein 5                              | 3.61E-06 | 59.71933 |
| APBA1     | 320   | amyloid beta A4 precursor protein-binding, family A       | 3.91E-06 | 59.61538 |
| CLG4B     | 4318  | gelatinase B                                              | 3.96E-06 | 59.51143 |
| CCR1      | 1230  | chemokine (C-C motif) receptor 1                          | 4.09E-06 | 59.40748 |
| PP2Ac     | 5515  | protein phosphatase 2, catalytic subunit, alpha isoform   | 4.1E-06  | 59.30353 |
| CUL3      | 8452  | cullin 3                                                  | 4.16E-06 | 59.19958 |
| ALK1      | 6590  | secretory leukocyte protease inhibitor                    | 4.16E-06 | 59.09563 |
| IPOA1     | 3838  | karyopherin alpha 2                                       | 4.17E-06 | 58.99168 |
| BUB1B     | 701   | budding uninhibited by benzimidazoles 1 (yeast homolog)   | 4.27E-06 | 58.88773 |
| PI4K-BETA | 5298  | type III phosphatidylinositol 4-kinase beta               | 4.29E-06 | 58.78378 |
| MGC21659  | 7069  | spot 14 protein                                           | 4.33E-06 | 58.67983 |
| IMB1      | 3837  | importin beta-1 subunit                                   | 4.55E-06 | 58.57588 |
| AHR       | 196   | aromatic hydrocarbon receptor                             | 4.57E-06 | 58.47193 |
| DKFZp686E | 6772  | signal transducer and activator of transcription-1        | 4.58E-06 | 58.36798 |
| KIAA0339  | 9739  | SET domain containing 1A                                  | 4.61E-06 | 58.26403 |
| GRB-IR    | 2887  | growth factor receptor-bound protein 10                   | 4.64E-06 | 58.16008 |
| CAM2      | 816   | proline rich calmodulin-dependent protein kinase          | 4.77E-06 | 57.90021 |
| CAMK2A    | 815   | CaM kinase II alpha subunit                               | 4.77E-06 | 57.90021 |
| CAMK      | 818   | calcium/calmodulin-dependent protein kinase               | 4.77E-06 | 57.90021 |
| CAMK2D    | 817   | calcium/calmodulin-dependent protein kinase II delta      | 4.77E-06 | 57.90021 |
| CRM1      | 7514  | exportin 1 (CRM1, yeast, homolog)                         | 4.86E-06 | 57.64033 |
| FLJ14651  | 10401 | protein inhibitor of activated STAT, 3                    | 5.1E-06  | 57.53638 |
| CIN85     | 30011 | SH3-domain kinase binding protein 1                       | 5.19E-06 | 57.43243 |
| CASP7     | 840   | caspase 7, apoptosis-related cysteine peptidase           | 5.21E-06 | 57.32848 |
| AAD10     | 8085  | trinucleotide repeat containing 21                        | 5.41E-06 | 57.22453 |
| FLJ36605  | 7431  | vimentin                                                  | 5.45E-06 | 57.12058 |
| RRAS      | 6237  | Oncogene RRAS                                             | 5.65E-06 | 57.01663 |
| ARA54     | 9604  | androgen receptor associated protein 54                   | 5.69E-06 | 56.86071 |
| 1200006M  | 55827 | androgen receptor complex-associated protein              | 5.69E-06 | 56.86071 |
| EPK2      | 23683 | protein kinase C, nu                                      | 5.91E-06 | 56.70478 |
| BACH1     | 83990 | BRCA1-interacting protein 1                               | 6.02E-06 | 56.54886 |
| MAZR      | 23598 | zinc finger protein 278                                   | 6.02E-06 | 56.54886 |
| MGC26418  | 5173  | rimorphin                                                 | 6.04E-06 | 56.39293 |
| GH        | 2688  | pituitary growth hormone                                  | 6.13E-06 | 56.28898 |

|           |                                                                            |          |          |
|-----------|----------------------------------------------------------------------------|----------|----------|
| APLP      | 333 amyloid-like protein 1                                                 | 6.18E-06 | 56.18503 |
| CASP3     | 836 caspase 3, apoptosis-related cysteine protease                         | 6.34E-06 | 56.08108 |
| ARNO      | 9266 cytohesin 2                                                           | 6.47E-06 | 55.97713 |
| JAK2      | 3717 janus kinase 2                                                        | 6.53E-06 | 55.87318 |
| CNR2      | 56142 KIAA0345-like 8                                                      | 6.62E-06 | 55.76923 |
| DKFZp586N | 4088 mad homolog JV15-2                                                    | 6.67E-06 | 55.66528 |
| ELA2      | 1991 polymorphonuclear elastase                                            | 6.74E-06 | 55.56133 |
| CNR1      | 56144 ortholog of mouse CNR1                                               | 6.74E-06 | 55.45738 |
| DELTA     | 7528 YY1 transcription factor                                              | 6.82E-06 | 55.35343 |
| STAT4     | 6775 signal transducer and activator of transcription 4                    | 6.87E-06 | 55.24948 |
| IKBKE     | 9641 inhibitor of kappa light polypeptide gene enhancer in B-cell          | 7.17E-06 | 55.14553 |
| DTR       | 1839 heparin-binding epidermal growth factor                               | 7.4E-06  | 55.04158 |
| TREB5     | 7494 box binding protein 1                                                 | 7.73E-06 | 54.93763 |
| CSEN      | 30818 calsenilin, presenilin-binding protein, EF hand transcription factor | 7.89E-06 | 54.83368 |
| F-SRC-1   | 8648 nuclear receptor coactivator 1                                        | 8.04E-06 | 54.72973 |
| GATA3     | 2625 GATA binding protein 3                                                | 8.05E-06 | 54.62578 |
| MGC13000  | 5058 p21/Cdc42/Rac1-activated kinase 1 (STE20 homolog, yeast)              | 8.12E-06 | 54.52183 |
| A1A       | 5265 serine proteinase inhibitor, clade A, member 1                        | 8.22E-06 | 54.41788 |
| NR1B1     | 5914 nucleophosmin-retinoic acid receptor alpha fusion protein             | 8.4E-06  | 54.31393 |
| EBP50     | 9368 solute carrier family 9 (sodium/hydrogen exchanger)                   | 8.47E-06 | 54.20998 |
| MYF3      | 4654 myogenic differentiation 1                                            | 8.8E-06  | 54.05405 |
| OPMD      | 8106 poly(A) binding protein, nuclear 1                                    | 8.8E-06  | 54.05405 |
| ALIEN     | 9318 thyroid receptor interacting protein 15                               | 9.14E-06 | 53.89813 |
| CF2R      | 2149 thrombin receptor                                                     | 9.23E-06 | 53.79418 |
| PLCG2     | 5336 phospholipase C gamma 2                                               | 9.32E-06 | 53.63825 |
| APKD2     | 5311 polycystic kidney disease 2 (autosomal dominant)                      | 9.32E-06 | 53.63825 |
| ARF1      | 375 ADP-ribosylation factor 1                                              | 9.59E-06 | 53.48233 |
| MGC3672   | 5500 protein phosphatase 1, catalytic subunit, delta isoform               | 9.86E-06 | 53.37838 |
| ABL       | 25 proto-oncogene tyrosine-protein kinase ABL1                             | 1.01E-05 | 53.27443 |
| G13       | 10672 guanine nucleotide binding protein (G protein), alpha 13             | 1.01E-05 | 53.1185  |
| GNA12     | 2768 guanine nucleotide binding protein (G protein) alpha 12               | 1.01E-05 | 53.1185  |
| CDK5      | 1020 protein kinase CDK5 splicing                                          | 1.02E-05 | 52.96258 |
| CRKL      | 1399 v-crk avian sarcoma virus CT10 oncogene homolog-like                  | 1.03E-05 | 52.85863 |
| CLD1      | 9076 claudin 1                                                             | 1.04E-05 | 52.75468 |
| FLJ44809  | 2475 FKBP12-rapamycin complex-associated protein 1                         | 1.07E-05 | 52.65073 |
| CACNB3    | 784 calcium channel, voltage-dependent, beta 3 subunit                     | 1.08E-05 | 52.54678 |
| GABATHG   | 6529 solute carrier family 6 (neurotransmitter transporter, GABA)          | 1.08E-05 | 52.33888 |
| HPC-1     | 6804 syntaxin 1A (brain)                                                   | 1.08E-05 | 52.33888 |
| FLJ12615  | 64398 MAGUK p55 subfamily member 5                                         | 1.08E-05 | 52.33888 |
| ACTA      | 58 alpha skeletal muscle actin                                             | 1.09E-05 | 51.97505 |
| ACT       | 72 alpha-actin 3                                                           | 1.09E-05 | 51.97505 |
| ACTC      | 70 cardiac muscle alpha actin 1                                            | 1.09E-05 | 51.97505 |
| AAT6      | 59 actin, alpha 2, smooth muscle, aorta                                    | 1.09E-05 | 51.97505 |
| V75       | 7448 complement S-protein                                                  | 1.1E-05  | 51.71518 |
| ARNO3     | 9265 general receptor of phosphoinositides 1                               | 1.14E-05 | 51.61123 |
| DKFZp667C | 10482 nuclear RNA export factor 1                                          | 1.16E-05 | 51.50728 |
| APPBP2    | 10513 amyloid beta precursor protein-binding protein 2                     | 1.16E-05 | 51.40333 |

|           |       |                                                             |          |          |
|-----------|-------|-------------------------------------------------------------|----------|----------|
| ABI-1     | 10006 | nap1 binding protein                                        | 1.18E-05 | 51.29938 |
| BMK1      | 5598  | mitogen-activated protein kinase 7                          | 1.18E-05 | 51.19543 |
| BMP2B     | 652   | bone morphogenetic protein 4                                | 1.2E-05  | 51.09148 |
| CARD3     | 8767  | CARD-containing interleukin-1 beta-converting enzyme        | 1.21E-05 | 50.98753 |
| IRF4      | 3662  | interferon regulatory factor 4                              | 1.23E-05 | 50.88358 |
| ARMD3     | 10516 | fibulin 5                                                   | 1.25E-05 | 50.77963 |
| MGC43321  | 5896  | recombination activating protein 1                          | 1.28E-05 | 50.6237  |
| RAG-2     | 5897  | recombination activating gene 2                             | 1.28E-05 | 50.6237  |
| BCCIP     | 56647 | cdk inhibitor p21 binding protein                           | 1.28E-05 | 50.46778 |
| AAA       | 351   | amyloid beta A4 protein                                     | 1.28E-05 | 50.36383 |
| BCGF-1    | 3565  | B cell growth factor 1                                      | 1.3E-05  | 50.25988 |
| BING2     | 1616  | death-associated protein 6                                  | 1.33E-05 | 50.15593 |
| FADK      | 5747  | focal adhesion kinase 1                                     | 1.33E-05 | 50.05198 |
| PC        | 5624  | protein C (inactivator of coagulation factors Va and VIIIa) | 1.37E-05 | 49.94802 |
| PAX2      | 5076  | paired box protein 2                                        | 1.38E-05 | 49.84407 |
| FBN       | 2200  | fibrillin 1                                                 | 1.39E-05 | 49.74012 |
| G1P2      | 9636  | ubiquitin cross-reactive protein                            | 1.4E-05  | 49.63617 |
| FLJ94509  | 2672  | zinc finger protein 163                                     | 1.43E-05 | 49.53222 |
| BDB       | 4920  | neurotrophic tyrosine kinase receptor-related 2             | 1.5E-05  | 49.42827 |
| FLJ17670  | 7535  | zeta-chain associated protein kinase 70kDa                  | 1.55E-05 | 49.32432 |
| CEBP      | 64506 | cytoplasmic polyadenylation element binding protein 1       | 1.58E-05 | 49.22037 |
| C-FMS     | 1436  | macrophage colony stimulating factor I receptor             | 1.59E-05 | 49.11642 |
| FLJ26658  | 3693  | integrin, beta 5                                            | 1.61E-05 | 49.01247 |
| CNTFR     | 1271  | CNTFR alpha                                                 | 1.67E-05 | 48.85655 |
| CD118     | 3977  | CD118 antigen                                               | 1.67E-05 | 48.85655 |
| CBX       | 10951 | heterochromatin protein p25 beta                            | 1.7E-05  | 48.70062 |
| MAF       | 4094  | Avian musculoaponeurotic fibrosarcoma (MAF)                 | 1.71E-05 | 48.59667 |
| GRIP1     | 10499 | glucocorticoid receptor-interacting protein-1               | 1.71E-05 | 48.49272 |
| KLK-L6    | 43847 | kallikrein-like protein 6                                   | 1.71E-05 | 48.38877 |
| C358B7.1  | 7329  | ubiquitin-conjugating enzyme E2I                            | 1.72E-05 | 48.28482 |
| ARP1      | 7026  | transcription factor COUP 2                                 | 1.73E-05 | 48.18087 |
| KIAA0403  | 4988  | mu opiate receptor                                          | 1.74E-05 | 48.07692 |
| MGC11154  | 5879  | migration-inducing gene 5                                   | 1.74E-05 | 47.97297 |
| MGC87674  | 10011 | steroid receptor RNA activator 1 (complexes with NCOA1)     | 1.77E-05 | 47.86902 |
| DKFZp686N | 2099  | estrogen receptor 1                                         | 1.78E-05 | 47.76507 |
| C1orf12   | 54583 | egl nine homolog 1                                          | 1.8E-05  | 47.66112 |
| HsT17432  | 4091  | MAD, mothers against decapentaplegic homolog 6              | 1.85E-05 | 47.55717 |
| ARF6      | 382   | ADP-ribosylation factor 6                                   | 1.85E-05 | 47.40125 |
| ARFGEP10C | 9922  | IQ motif and Sec7 domain 1                                  | 1.85E-05 | 47.40125 |
| BM600     | 3909  | epiligrin alpha 3 subunit                                   | 1.91E-05 | 47.24532 |
| C-BAS/HAS | 3265  | c-ras-Ki-2 activated oncogene                               | 1.93E-05 | 47.14137 |
| DKFZp781F | 80314 | enhancer of polycomb 1                                      | 1.93E-05 | 47.03742 |
| BF1       | 2290  | oncogene QIN                                                | 1.94E-05 | 46.93347 |
| ACT       | 71    | actin-like protein                                          | 2.27E-05 | 46.77755 |
| ACTB      | 60    | PS1TP5-binding protein 1                                    | 2.27E-05 | 46.77755 |
| ASC       | 29108 | apoptosis-associated speck-like protein containing a CARD   | 2.29E-05 | 46.62162 |
| APCA      | 773   | brain calcium channel 1                                     | 2.34E-05 | 46.51767 |

|          |        |                                                              |          |          |
|----------|--------|--------------------------------------------------------------|----------|----------|
| AF-6     | 4301   | myeloid/lymphoid or mixed-lineage leukemia                   | 2.35E-05 | 46.41372 |
| KIAA1303 | 57521  | regulatory associated protein of mTOR                        | 2.35E-05 | 46.30977 |
| ATP1A1   | 476    | Na <sup>+</sup> /K <sup>+</sup> ATPase 1                     | 2.36E-05 | 46.20582 |
| ACVRL1   | 94     | activin A receptor, type II-like kinase 1                    | 2.38E-05 | 46.10187 |
| DFNA1    | 1729   | diaphanous 1                                                 | 2.46E-05 | 45.99792 |
| CDX-3    | 1045   | caudal type homeo box transcription factor 2                 | 2.56E-05 | 45.89397 |
| MPO      | 4353   | myeloperoxidase                                              | 2.66E-05 | 45.73805 |
| ALB      | 213    | cell growth inhibiting protein 42                            | 2.66E-05 | 45.73805 |
| ADAM12   | 8038   | a disintegrin and metalloproteinase domain 12                | 2.68E-05 | 45.58212 |
| C2orf5   | 150684 | MURR1                                                        | 2.7E-05  | 45.47817 |
| HRSP12   | 10247  | heat-responsive protein 12                                   | 2.8E-05  | 45.37422 |
| EHK3     | 2045   | Eph homology kinase-3                                        | 2.81E-05 | 45.27027 |
| COL1A2   | 1278   | collagen I, alpha-2 polypeptide                              | 2.83E-05 | 45.11435 |
| COL1A1   | 1277   | alpha 1 type I collagen                                      | 2.83E-05 | 45.11435 |
| ALK      | 238    | anaplastic lymphoma kinase Ki-1                              | 2.89E-05 | 44.95842 |
| CYT4     | 27128  | cytohesin-4                                                  | 2.94E-05 | 44.85447 |
| FLJ11460 | 6844   | synaptobrevin 2                                              | 2.96E-05 | 44.69854 |
| FLJ23079 | 6616   | synaptosomal-associated protein 25                           | 2.96E-05 | 44.69854 |
| ARVD     | 7043   | transforming growth factor, beta 3                           | 3.06E-05 | 44.54262 |
| MGC11689 | 7042   | transforming growth factor, beta 2                           | 3.11E-05 | 44.43867 |
| VASP     | 7408   | vasodilator-stimulated phosphoprotein                        | 3.17E-05 | 44.33472 |
| CD309    | 3791   | vascular endothelial growth factor receptor 2                | 3.2E-05  | 44.23077 |
| CACH2    | 775    | voltage-gated calcium channel alpha subunit Cav1.2           | 3.23E-05 | 44.02287 |
| CAB1     | 782    | dihydropyridine-sensitive L-type, calcium channel beta-1     | 3.23E-05 | 44.02287 |
| BKTM     | 3778   | bA205K10.1                                                   | 3.23E-05 | 44.02287 |
| AD3      | 5663   | presenilin 1                                                 | 3.25E-05 | 43.81497 |
| HMOX2    | 3163   | heme oxygenase (decycling) 2                                 | 3.28E-05 | 43.65904 |
| CACNB2   | 783    | calcium channel, voltage-dependent, beta 2 subunit           | 3.28E-05 | 43.65904 |
| FLT      | 2321   | vascular endothelial growth factor/vascular permeability     | 3.39E-05 | 43.50312 |
| PTP1B    | 5770   | protein tyrosine phosphatase 1B                              | 3.48E-05 | 43.39917 |
| F11      | 2160   | platelet coagulation factor XI                               | 3.76E-05 | 43.24324 |
| APOH     | 350    | beta-2-glycoprotein I                                        | 3.76E-05 | 43.24324 |
| CRC18    | 1630   | deleted in colorectal cancer protein                         | 3.8E-05  | 43.08732 |
| BABL     | 8091   | high-mobility group (nonhistone chromosomal)                 | 3.86E-05 | 42.98337 |
| ATF3     | 467    | activating transcription factor 3                            | 3.88E-05 | 42.87942 |
| C20orf36 | 4661   | myelin transcription factor 1                                | 4.01E-05 | 42.77547 |
| CALNB1   | 5534   | protein phosphatase 3, regulatory subunit B, alpha isoform 1 | 4.05E-05 | 42.61954 |
| PPP3R2   | 5535   | protein phosphatase 3, regulatory subunit B (calcineurin B)  | 4.05E-05 | 42.61954 |
| ADCAD2   | 4040   | low density lipoprotein receptor-related protein 6           | 4.05E-05 | 42.46362 |
| HHO.C1   | 3217   | homeo box B7                                                 | 4.05E-05 | 42.30769 |
| GATA6    | 2627   | GATA binding protein 6                                       | 4.05E-05 | 42.30769 |
| FLJ11330 | 29110  | TANK-binding kinase 1                                        | 4.18E-05 | 42.15177 |
| FLJ43335 | 5792   | leukocyte antigen-related (LAR) PTP receptor                 | 4.29E-05 | 42.04782 |
| CD142    | 2152   | coagulation factor III (thromboplastin, tissue factor)       | 4.3E-05  | 41.94387 |
| ALK-6    | 658    | bone morphogenetic protein receptor, type IB                 | 4.35E-05 | 41.83992 |
| ARHGAP1  | 392    | Rho GTPase activating protein 1                              | 4.45E-05 | 41.73597 |
| ARB1     | 408    | arrestin beta 1                                              | 4.46E-05 | 41.63202 |

|           |        |                                                            |          |          |
|-----------|--------|------------------------------------------------------------|----------|----------|
| ALPS2     | 843    | caspase 10                                                 | 4.57E-05 | 41.52807 |
| FLJ97193  | 10023  | proto-oncogene FRAT1                                       | 4.59E-05 | 41.42412 |
| AIS       | 8626   | tumor protein p63                                          | 4.61E-05 | 41.32017 |
| GEFT      | 115557 | RAC/CDC42 exchange factor                                  | 4.71E-05 | 41.21622 |
| DAP-150   | 1639   | p150-glued                                                 | 4.75E-05 | 41.11227 |
| CLG1      | 4317   | PMNL collagenase                                           | 4.8E-05  | 41.00832 |
| FLJ12099  | 5602   | mitogen-activated protein kinase 10                        | 5.05E-05 | 40.90437 |
| DKFZp686A | 6789   | dJ211D12.2 (serine/threonine kinase 4 (MST1, KRS2))        | 5.07E-05 | 40.80042 |
| NR111     | 7421   | vitamin D (1,25-dihydroxyvitamin D3) receptor              | 5.08E-05 | 40.69647 |
| CD119     | 3459   | AVP, type 2                                                | 5.1E-05  | 40.59252 |
| NFE2L2    | 4780   | nuclear factor (erythroid-derived 2)-like 2                | 5.26E-05 | 40.48857 |
| G-ALPHA-h | 7052   | TGase-H                                                    | 5.3E-05  | 40.38462 |
| GCCR      | 2908   | glucocorticoid receptor                                    | 5.48E-05 | 40.28067 |
| ARHGAP14  | 9901   | WAVE-associated Rac GTPase activating protein              | 5.62E-05 | 40.17672 |
| PTP-PEST  | 5782   | protein-tyrosine phosphatase G1                            | 5.69E-05 | 40.07277 |
| MGC10556  | 7205   | zyxin related protein 1                                    | 5.72E-05 | 39.96881 |
| ABT1      | 29777  | activator of basal transcription 1                         | 5.84E-05 | 39.86486 |
| AF17q25   | 10801  | MLL septin-like fusion                                     | 5.84E-05 | 39.76091 |
| FLJ31482  | 8936   | verprolin homology domain-containing protein 1             | 6.04E-05 | 39.65696 |
| ALL       | 613    | breakpoint cluster region                                  | 6.05E-05 | 39.55301 |
| PFN1      | 5216   | profilin 1                                                 | 6.13E-05 | 39.44906 |
| ATOD4     | 9021   | suppressor of cytokine signaling 3                         | 6.28E-05 | 39.34511 |
| CDC25     | 5923   | Ras-specific nucleotide exchange factor CDC25              | 6.36E-05 | 39.24116 |
| GLUH1     | 2890   | glutamate receptor, ionotropic, AMPA 1                     | 6.47E-05 | 39.08524 |
| DKFZp781F | 5924   | Ras protein-specific guanine nucleotide-releasing factor 2 | 6.47E-05 | 39.08524 |
| RPS7      | 6201   | ribosomal protein S7                                       | 6.5E-05  | 38.92931 |
| DKFZp781E | 6857   | synaptotagmin I                                            | 6.75E-05 | 38.82536 |
| BEK       | 2263   | FGF receptor                                               | 6.87E-05 | 38.72141 |
| IRF5      | 3663   | interferon regulatory factor 5                             | 7.11E-05 | 38.61746 |
| 60B8AG    | 6280   | calgranulin B                                              | 7.43E-05 | 38.51351 |
| HRMT1L3   | 10196  | protein arginine methyltransferase 3                       | 7.57E-05 | 38.40956 |
| C20orf97  | 57761  | p65-interacting inhibitor of NF-kappaB                     | 7.6E-05  | 38.30561 |
| RGS14     | 10636  | regulator of G-protein signalling 14                       | 7.6E-05  | 38.20166 |
| C5FW      | 28951  | tribbles homolog 2 (Drosophila)                            | 7.64E-05 | 38.09771 |
| EAR1      | 9572   | thyroid hormone receptor, alpha-like                       | 7.73E-05 | 37.99376 |
| NCF1      | 653361 | NADPH oxidase organizer 2                                  | 7.79E-05 | 37.88981 |
| BAD       | 572    | BCL2-binding protein                                       | 7.88E-05 | 37.78586 |
| PRL       | 5617   | prolactin                                                  | 8.07E-05 | 37.68191 |
| DNMT3A    | 1788   | DNA (cytosine-5-)-methyltransferase 3 alpha                | 8.14E-05 | 37.57796 |
| PRLR      | 5618   | prolactin receptor                                         | 8.29E-05 | 37.47401 |
| KRML      | 9935   | transcription factor MAFB                                  | 8.37E-05 | 37.37006 |
| DOCK1     | 1793   | dedicator of cyto-kinesis 1                                | 8.38E-05 | 37.26611 |
| FLJ26625  | 4067   | v-yes-1 Yamaguchi sarcoma viral related oncogene           | 8.48E-05 | 37.16216 |
| KIAA1415  | 57580  | phosphatidylinositol-3,4,5-trisphosphate-dependent Rac     | 8.67E-05 | 37.00624 |
| DOCK2     | 1794   | dedicator of cytokinesis 2                                 | 8.67E-05 | 37.00624 |
| AFBP      | 3484   | amniotic fluid binding protein                             | 8.7E-05  | 36.85031 |
| EAP1      | 9232   | ESP1-associated protein 1                                  | 8.86E-05 | 36.74636 |

|           |        |                                                            |          |          |
|-----------|--------|------------------------------------------------------------|----------|----------|
| FACT      | 6749   | chromatin-specific transcription elongation factor 80 kDa  | 9.02E-05 | 36.64241 |
| BIP       | 3309   | Heat-shock 70kD protein-5 (glucose-regulated protein)      | 9.04E-05 | 36.53846 |
| DKFZp586I | 84231  | TNF receptor-associated factor 7                           | 9.07E-05 | 36.43451 |
| MMP-7     | 4316   | uterine matrilysin                                         | 9.1E-05  | 36.33056 |
| ATR       | 545    | MEC1, mitosis entry checkpoint 1, homolog                  | 9.13E-05 | 36.22661 |
| KOR       | 4986   | opioid receptor, kappa 1                                   | 9.19E-05 | 36.12266 |
| FCA/MR    | 83953  | immunity related factor                                    | 9.27E-05 | 36.01871 |
| FLJ43224  | 4738   | neural precursor cell expressed, developmentally           | 9.54E-05 | 35.86279 |
| BS4       | 51667  | NY-REN-18 antigen                                          | 9.54E-05 | 35.86279 |
| MGC13185  | 7334   | ubiquitin carrier protein N                                | 9.59E-05 | 35.70686 |
| GRB1      | 5295   | phosphoinositide-3-kinase, regulatory subunit, polypeptide | 9.63E-05 | 35.60291 |
| ADHR      | 554    | arginine vasopressin receptor 2                            | 9.69E-05 | 35.49896 |
| BMP14     | 8200   | cartilage-derived morphogenetic protein-1                  | 9.71E-05 | 35.39501 |
| SYN1      | 6853   | brain protein 4.1                                          | 0.000102 | 35.29106 |
| MGC70609  | 7422   | vascular permeability factor                               | 0.000103 | 35.18711 |
| IBMPFD    | 7415   | valosin-containing protein                                 | 0.000105 | 35.08316 |
| GF1       | 6654   | son of sevenless homolog 1                                 | 0.000106 | 34.97921 |
| FLJ25596  | 6655   | son of sevenless homolog 2                                 | 0.000108 | 34.87526 |
| HPE2      | 6496   | holoprosencephaly 2, alobar or semilobar                   | 0.00011  | 34.77131 |
| HUMSIAH   | 6477   | seven in absentia homolog 1                                | 0.000111 | 34.66736 |
| KIAA1625  | 57154  | Smad-specific E3 ubiquitin ligase 1                        | 0.000115 | 34.56341 |
| MAPKAPK2  | 9261   | mitogen-activated protein kinase-activated protein kinase  | 0.000116 | 34.45946 |
| AIK       | 6790   | serine/threonine protein kinase 6                          | 0.000118 | 34.35551 |
| EFNB2     | 1948   | ephrin B2                                                  | 0.000121 | 34.25156 |
| MGC15060  | 5586   | protein kinase N2                                          | 0.000124 | 34.14761 |
| ARB2      | 409    | arrestin, beta 2                                           | 0.000126 | 34.04366 |
| DKFZp686I | 5327   | alteplase                                                  | 0.000133 | 33.93971 |
| PRKAR2    | 5577   | protein kinase, cAMP-dependent, regulatory, type II, alpha | 0.000134 | 33.83576 |
| CED       | 7040   | TGF-beta 1 protein                                         | 0.000136 | 33.73181 |
| OT-R      | 5021   | oxytocin receptor                                          | 0.000137 | 33.62786 |
| JAK-3     | 3718   | Janus kinase 3                                             | 0.000138 | 33.52391 |
| CD49f     | 3655   | integrin alpha6B                                           | 0.000144 | 33.41996 |
| CLG3      | 4322   | matrix metalloproteinase 13                                | 0.000144 | 33.31601 |
| CLR11.4   | 171389 | NLR family, pyrin domain containing 6                      | 0.000148 | 33.21206 |
| HNRPE2    | 5094   | alpha-CP2                                                  | 0.000149 | 33.10811 |
| CLG       | 4312   | interstitial collagenase                                   | 0.000152 | 33.00416 |
| ABRI      | 9445   | BRICHOS domain containing 2B                               | 0.000153 | 32.90021 |
| EPHA4     | 2043   | tyrosine-protein kinase receptor SEK                       | 0.000155 | 32.79626 |
| AAT3      | 7048   | transforming growth factor, beta receptor II               | 0.000161 | 32.69231 |
| APOA1     | 335    | apolipoprotein A1                                          | 0.000166 | 32.58836 |
| GHDX      | 6658   | SRY (sex determining region Y)-box 3                       | 0.000168 | 32.48441 |
| ARHG      | 391    | ras homolog gene family, member G (rho G)                  | 0.000169 | 32.32848 |
| DOCK4     | 9732   | dedicator of cytokinesis 4                                 | 0.000169 | 32.32848 |
| MEF2C     | 4208   | MADS box transcription enhancer factor 2, polypeptide C    | 0.000172 | 32.01663 |
| DKFZp686I | 4209   | myocyte enhancer factor 2D                                 | 0.000172 | 32.01663 |
| FLJ32599  | 4207   | myocyte enhancer factor 2B                                 | 0.000172 | 32.01663 |
| ADCAD1    | 4205   | myocyte enhancer factor 2A                                 | 0.000172 | 32.01663 |

|           |                                                                        |          |          |
|-----------|------------------------------------------------------------------------|----------|----------|
| BP-53     | 3486 binding protein 53                                                | 0.000173 | 31.75676 |
| ELF3      | 1999 E74-like factor 3 (ets domain transcription factor, epithelial)   | 0.000178 | 31.65281 |
| BIRC7     | 79444 livin inhibitor of apoptosis                                     | 0.000182 | 31.54886 |
| SCAP1     | 8631 src kinase associated phosphoprotein 1                            | 0.000196 | 31.44491 |
| ADAP      | 2533 FYN-binding protein (FYB-120/130)                                 | 0.000199 | 31.34096 |
| ACC-4     | 1512 cathepsin H                                                       | 0.0002   | 31.23701 |
| CSNK1E    | 1454 casein kinase 1 epsilon                                           | 0.000202 | 31.13306 |
| F-TCF     | 3082 hepatocyte growth factor                                          | 0.000203 | 31.02911 |
| C6        | 5688 proteasome subunit alpha 4                                        | 0.00021  | 30.92516 |
| EIF2AK1   | 5610 double stranded RNA activated protein kinase                      | 0.000218 | 30.82121 |
| DKFZp779C | 8976 neural Wiskott-Aldrich syndrome protein                           | 0.000219 | 30.71726 |
| FER       | 2241 phosphoprotein NCP94                                              | 0.000221 | 30.61331 |
| NOV       | 5361 plexin 1                                                          | 0.000227 | 30.50936 |
| BARS      | 1487 C-terminal binding protein 1                                      | 0.000228 | 30.40541 |
| FLOT1     | 10211 flotillin 1                                                      | 0.000228 | 30.30146 |
| D3DR      | 1814 dopamine receptor D3                                              | 0.000231 | 30.19751 |
| CORD7     | 22999 regulating synaptic membrane exocytosis 1                        | 0.000231 | 30.04158 |
| RAB10     | 10890 ras-related GTP-binding protein RAB10                            | 0.000231 | 30.04158 |
| CAK       | 780 neurotrophic tyrosine kinase, receptor, type 4                     | 0.000233 | 29.88565 |
| CLM       | 3912 laminin, beta 1                                                   | 0.000235 | 29.67775 |
| LAMB2     | 3915 formerly LAMB2                                                    | 0.000235 | 29.67775 |
| LAMA      | 284217 laminin, alpha 1                                                | 0.000235 | 29.67775 |
| DDIT1     | 1647 DNA damage-inducible transcript 1                                 | 0.000236 | 29.46985 |
| B2-1      | 9267 homolog of secretory protein SEC7                                 | 0.00024  | 29.3659  |
| BAP-1     | 6045 ring finger protein 2                                             | 0.000245 | 29.26195 |
| DKFZp586E | 9477 Trf (TATA binding protein-related factor)-proximal homolog (Droso | 0.000248 | 29.158   |
| SFRS3     | 6428 splicing factor, arginine/serine-rich, 20-kD                      | 0.00025  | 29.05405 |
| C-MPL     | 4352 thrombopoietin receptor                                           | 0.000264 | 28.9501  |
| CD120a    | 7132 tumor necrosis factor receptor type 1                             | 0.000268 | 28.84615 |
| MAPKAPK5  | 8550 mitogen-activated protein kinase-activated protein kinase 5       | 0.000268 | 28.7422  |
| ERN1      | 2081 endoplasmic reticulum to nucleus signaling 1                      | 0.000288 | 28.63825 |
| DKFZp781F | 9451 eukaryotic translation initiation factor 2-alpha kinase 3         | 0.000289 | 28.5343  |
| Bos1      | 9570 golgi SNAP receptor complex member 2                              | 0.00029  | 28.43035 |
| AG2S      | 185 angiotensin receptor 1B                                            | 0.000293 | 28.3264  |
| B2T       | 3918 laminin, gamma 2 (nicein (100kD), kalinin (105kD))                | 0.000299 | 28.22245 |
| AMY-1     | 26292 associate of myc-1                                               | 0.000306 | 28.1185  |
| GPRC1A    | 2911 glutamate receptor, metabotropic 1                                | 0.000309 | 28.01455 |
| CDCD1     | 4000 limb girdle muscular dystrophy 1B (autosomal dominant)            | 0.000312 | 27.9106  |
| DKFZp686F | 3611 integrin-linked kinase                                            | 0.00032  | 27.80665 |
| FLJ34027  | 10657 KH domain containing, RNA binding                                | 0.000327 | 27.7027  |
| CCT-alpha | 6950 T-complex protein 1, alpha subunit                                | 0.000328 | 27.59875 |
| KCIP-1    | 7534 phospholipase A2                                                  | 0.000333 | 27.4948  |
| AP3Aase   | 2272 dinucleosidetriphosphatase                                        | 0.000335 | 27.39085 |
| KIAA0190  | 9100 ubiquitin carboxyl-terminal hydrolase 10                          | 0.000346 | 27.2869  |
| OS9       | 10956 amplified in osteosarcoma                                        | 0.00036  | 27.18295 |
| Hs.2563   | 6863 tachykinin 1                                                      | 0.000365 | 27.079   |
| ANKRD28   | 23243 phosphatase interactor targeting K protein                       | 0.000369 | 26.97505 |

|           |                                                                |          |          |
|-----------|----------------------------------------------------------------|----------|----------|
| HPK38     | 9833 pEg3 kinase                                               | 0.00038  | 26.8711  |
| INrf2     | 9817 kelch-like ECH-associated protein 1                       | 0.000388 | 26.76715 |
| EDNRA     | 1909 endothelin receptor type A                                | 0.000396 | 26.6632  |
| GIF       | 4282 phenylpyruvate tautomerase                                | 0.000402 | 26.55925 |
| ELF5      | 2001 epithelium-specific Ets transcription factor 2            | 0.000402 | 26.4553  |
| C2H2-171  | 10472 zinc finger protein 238                                  | 0.000404 | 26.35135 |
| CD104     | 3691 GP150                                                     | 0.00041  | 26.2474  |
| LSP1      | 4046 F-actin binding and cytoskeleton associated protein       | 0.000429 | 26.14345 |
| ELK4      | 2005 SRF accessory protein 1                                   | 0.00044  | 26.0395  |
| DIF       | 7124 TNF, monocyte-derived                                     | 0.000442 | 25.93555 |
| EDF       | 3624 inhibin, beta A (activin A, activin AB alpha polypeptide) | 0.000444 | 25.72765 |
| BMP-11    | 10220 growth differentiation factor 11                         | 0.000444 | 25.72765 |
| ACTRIIB   | 93 activin A type IIB receptor                                 | 0.000444 | 25.72765 |
| DKFZp779N | 5340 plasminogen                                               | 0.000452 | 25.51975 |
| C21       | 79718 transducin (beta)-like 1X-linked receptor 1              | 0.000454 | 25.4158  |
| CD18      | 3689 complement receptor C3 beta-subunit                       | 0.000459 | 25.25988 |
| ADB2      | 3681 leukointegrin alpha D                                     | 0.000459 | 25.25988 |
| MGC10182  | 6591 slug homolog, zinc finger protein                         | 0.000461 | 25.10395 |
| HCRTR1    | 3061 orexin receptor 1                                         | 0.000465 | 25       |
| APPS      | 1508 cysteine protease                                         | 0.000468 | 24.89605 |
| FLJ21263  | 8729 golgi-specific brefeldin A resistance factor 1            | 0.000471 | 24.7921  |
| CD11C     | 3687 myeloid membrane antigen, alpha subunit                   | 0.000471 | 24.68815 |
| CMTX      | 2705 connexin 32                                               | 0.000477 | 24.5842  |
| ELN       | 2006 tropoelastin                                              | 0.000478 | 24.48025 |
| C14orf18  | 57820 human enhancer of invasion 10                            | 0.00048  | 24.3763  |
| BOS3      | 6495 SIX homeobox 1                                            | 0.000496 | 24.27235 |
| CLOCK     | 9575 clock homolog (mouse)                                     | 0.000497 | 24.1684  |
| CCNE2     | 9134 cyclin E2                                                 | 0.000506 | 24.06445 |
| CD138     | 6382 syndecan proteoglycan 1                                   | 0.000515 | 23.9605  |
| BM600-12  | 3914 laminin B1k chain                                         | 0.000529 | 23.85655 |
| PAK2      | 5062 p21-activated kinase 2                                    | 0.000529 | 23.7526  |
| GPRC1E    | 2915 glutamate receptor, metabotropic 5                        | 0.00053  | 23.64865 |
| ADH       | 551 arginine vasopressin-neurophysin II                        | 0.000534 | 23.5447  |
| 2-5-3p    | 23265 exocyst complex component 7                              | 0.000542 | 23.44075 |
| AUF1      | 3184 heterogeneous nuclear ribonucleoprotein D (AU-rich)       | 0.000562 | 23.3368  |
| AXIN      | 8312 axin 1                                                    | 0.000571 | 23.18087 |
| AXIL      | 8313 axin 2                                                    | 0.000571 | 23.18087 |
| MGC15877  | 5499 serine/threonine protein phosphatase PP1-alpha 1          | 0.000574 | 22.921   |
| PPP1R7    | 5510 protein phosphatase-1 regulatory subunit 7 beta1          | 0.000574 | 22.921   |
| PPP1CC    | 5501 protein phosphatase 1, catalytic subunit, gamma isoform   | 0.000574 | 22.921   |
| F2RL3     | 9002 coagulation factor II (thrombin) receptor-like 3          | 0.000575 | 22.7131  |
| EPHA3     | 2042 ephrin receptor EphA3                                     | 0.000601 | 22.60915 |
| BCL3      | 602 B-cell leukemia/lymphoma 3                                 | 0.000612 | 22.5052  |
| FJHN      | 6928 transcription factor 2, hepatic                           | 0.000689 | 22.40125 |
| API4      | 332 survivin variant 3 alpha                                   | 0.000723 | 22.2973  |
| H731      | 27250 programmed cell death 4                                  | 0.000729 | 22.19335 |
| AR-JP     | 5071 parkin                                                    | 0.000739 | 22.0894  |



|            |       |                                                                |          |          |
|------------|-------|----------------------------------------------------------------|----------|----------|
| DKFzp547C  | 25970 | SH2B adaptor protein 1                                         | 0.000754 | 21.98545 |
| CD114      | 1441  | colony stimulating factor 3 receptor                           | 0.000755 | 21.8815  |
| CAMK1      | 8536  | calcium/calmodulin-dependent protein kinase I                  | 0.000775 | 21.77755 |
| ARF1GAP    | 55738 | ADP-ribosylation factor GTPase activating protein 1            | 0.000795 | 21.6736  |
| CD121A     | 3554  | interleukin 1 receptor alpha, type I                           | 0.000796 | 21.56965 |
| CSA        | 1442  | chorionic somatomammotropin A                                  | 0.000805 | 21.41372 |
| CS-2       | 1443  | placental lactogen                                             | 0.000805 | 21.41372 |
| DBC-1      | 57805 | deleted in breast cancer 1                                     | 0.000806 | 21.2578  |
| APBB1      | 322   | amyloid beta (A4) precursor protein-binding, family B          | 0.00081  | 21.15385 |
| GH-V       | 2689  | placental-specific growth hormone                              | 0.000818 | 21.0499  |
| CD11B      | 3684  | integrin alpha M                                               | 0.000833 | 20.94595 |
| NEF        | 6285  | S100 calcium binding protein, beta (neural)                    | 0.000846 | 20.842   |
| CD295      | 3953  | leptin receptor                                                | 0.000846 | 20.73805 |
| BA554C12.  | 9978  | ZYP protein                                                    | 0.000862 | 20.47817 |
| ELOB       | 6923  | transcription elongation factor B (SIII), polypeptide 2 (18kD) | 0.000862 | 20.47817 |
| SIII       | 6921  | transcription elongation factor B, polypeptide 1               | 0.000862 | 20.47817 |
| CUL2       | 8453  | cullin 2                                                       | 0.000862 | 20.47817 |
| CD262      | 8795  | death receptor 5                                               | 0.000873 | 20.2183  |
| ZIC        | 7545  | Zic family member 1 (odd-paired Drosophila homolog)            | 0.000877 | 20.11435 |
| RALBP1     | 10928 | ralA-binding protein                                           | 0.000879 | 20.0104  |
| ACAN       | 176   | large aggregating proteoglycan                                 | 0.000887 | 19.90644 |
| BN-1       | 1235  | chemokine (C-C motif) receptor 6                               | 0.000916 | 19.80249 |
| GHBP       | 2690  | somatotropin receptor                                          | 0.000929 | 19.69854 |
| FABP6      | 2172  | ileal bile acid binding protein                                | 0.000932 | 19.59459 |
| D2DR       | 1813  | seven transmembrane helix receptor                             | 0.000972 | 19.49064 |
| RP11-3J10. | 6461  | Src homology 2 domain containing adaptor protein B             | 0.001033 | 19.38669 |
| AFP        | 174   | alpha-1-fetoprotein                                            | 0.001038 | 19.28274 |
| CAR        | 846   | extracellular calcium-sensing receptor                         | 0.001052 | 19.02287 |
| RAMP1      | 10267 | calcitonin receptor-like receptor activity modifying protein 1 | 0.001052 | 19.02287 |
| RAMP3      | 10268 | receptor activity modifying protein 3                          | 0.001052 | 19.02287 |
| RAMP2      | 10266 | receptor (calcitonin) activity modifying protein 2             | 0.001052 | 19.02287 |
| GCKR       | 11183 | kinase homologous to SPS1/STE20                                | 0.00108  | 18.76299 |
| CD2AP      | 23607 | CD2-associated protein                                         | 0.001106 | 18.65904 |
| CMT1F      | 4747  | neurofilament, light polypeptide 68kDa                         | 0.001122 | 18.55509 |
| FGG        | 2266  | fibrinogen, gamma polypeptide                                  | 0.001128 | 18.34719 |
| FGB        | 2244  | fibrinogen, beta chain                                         | 0.001128 | 18.34719 |
| FGA        | 2243  | fibrinogen, alpha polypeptide                                  | 0.001128 | 18.34719 |
| YWHA1      | 7533  | 14-3-3 eta                                                     | 0.001136 | 18.13929 |
| DARPP-32   | 84152 | protein phosphatase 1, regulatory (inhibitor) subunit 1B       | 0.001159 | 18.03534 |
| LIS1       | 5048  | platelet-activating factor acetylhydrolase, isoform Ib         | 0.001165 | 17.93139 |
| CAP        | 10580 | sorbin and SH3 domain containing 1                             | 0.001176 | 17.82744 |
| HUMORFAI   | 8826  | IQ motif containing GTPase activating protein 1                | 0.001193 | 17.72349 |
| APO2       | 8797  | cytotoxic TRAIL receptor                                       | 0.001216 | 17.61954 |
| HOP        | 10963 | stress-induced-phosphoprotein 1                                | 0.001256 | 17.51559 |
| GNG2       | 54331 | guanine nucleotide binding protein (G protein), gamma 2        | 0.001324 | 17.35967 |
| GNB1       | 2782  | transducin beta chain 1                                        | 0.001324 | 17.35967 |
| IB1        | 9479  | mitogen-activated protein kinase 8 interacting protein 1       | 0.001325 | 17.20374 |

|           |        |                                                            |          |          |
|-----------|--------|------------------------------------------------------------|----------|----------|
| MGC48949  | 5898   | ras related v-ral simian leukemia viral oncogene homolog A | 0.001343 | 17.09979 |
| MGC:8389  | 9519   | TBP-related factor 2                                       | 0.001344 | 16.99584 |
| D3S1319E  | 5217   | profilin 2                                                 | 0.0014   | 16.89189 |
| BTEB      | 687    | basic transcription element binding protein 1              | 0.001416 | 16.78794 |
| DKFZp586f | 5908   | RAS-related protein RAP1B                                  | 0.001467 | 16.68399 |
| ABD-B     | 3205   | homeo box A9                                               | 0.00154  | 16.58004 |
| HNRPE1    | 5093   | poly(rC)-binding protein 1                                 | 0.001574 | 16.47609 |
| EDN2      | 1907   | endothelin 2                                               | 0.001642 | 16.32017 |
| EDN3      | 1908   | truncated endothelin 3                                     | 0.001642 | 16.32017 |
| LIMK      | 3984   | LIM domain kinase 1                                        | 0.001665 | 16.16424 |
| CD36      | 948    | scavenger receptor class B, member 3                       | 0.001707 | 16.06029 |
| AA        | 7003   | atrophia areata, peripapillary chorioretinal degeneration  | 0.001802 | 15.95634 |
| FLJ16752  | 59269  | human immunodeficiency virus type I enhancer               | 0.001824 | 15.85239 |
| GSC       | 145258 | goosecoid                                                  | 0.001845 | 15.74844 |
| CSCD      | 1634   | small leucine-rich protein 1B                              | 0.001848 | 15.64449 |
| MBP       | 4155   | myelin basic protein                                       | 0.001856 | 15.54054 |
| BWCR      | 1028   | cyclin-dependent kinase inhibitor 1C                       | 0.001862 | 15.43659 |
| DKFZp434n | 51277  | Ras-associated protein Rap1                                | 0.001867 | 15.33264 |
| GIG34     | 6135   | 60S ribosomal protein L11                                  | 0.001916 | 15.22869 |
| CASP5     | 838    | caspase 5, apoptosis-related cysteine protease             | 0.00192  | 15.12474 |
| DKFZp686k | 10625  | NS1-binding protein                                        | 0.001921 | 14.96881 |
| AIP       | 9049   | aryl hydrocarbon receptor interacting protein              | 0.001921 | 14.96881 |
| DKFZp686L | 55929  | DNMT1 associated protein 1                                 | 0.001937 | 14.76091 |
| DKFZp313c | 9628   | regulator of G-protein signaling 6                         | 0.001937 | 14.76091 |
| CRTC2     | 200186 | transducer of regulated cAMP response element              | 0.001965 | 14.60499 |
| CD8B      | 926    | CD8b molecule                                              | 0.001966 | 14.44906 |
| CD3-DELTA | 915    | CD3D antigen, delta polypeptide                            | 0.001966 | 14.44906 |
| GDF8      | 2660   | myostatin                                                  | 0.002047 | 14.29314 |
| OPRD      | 4985   | opioid receptor, delta 1                                   | 0.002097 | 14.18919 |
| ABCDS     | 1910   | Hirschsprung disease 2                                     | 0.00214  | 14.08524 |
| H1        | 6013   | prorelaxin                                                 | 0.002228 | 13.98129 |
| CFL2      | 1073   | cofilin 2                                                  | 0.002294 | 13.82536 |
| CFL       | 1072   | cofilin 1 (non-muscle)                                     | 0.002294 | 13.82536 |
| CUL1      | 8454   | cullin 1                                                   | 0.002296 | 13.66944 |
| GS1       | 4644   | myosin, heavy polypeptide kinase                           | 0.002306 | 13.56549 |
| CAPB      | 2048   | elk-related tyrosine kinase                                | 0.002315 | 13.46154 |
| ATX       | 5168   | autotaxin                                                  | 0.00232  | 13.35759 |
| ABR       | 29     | active breakpoint cluster region-related protein           | 0.002331 | 13.25364 |
| FLJ97602  | 4867   | nephrocystin-1                                             | 0.002355 | 13.14969 |
| DKFZp762F | 55662  | hypoxia-inducible factor 1, alpha subunit inhibitor        | 0.002397 | 13.04574 |
| GIG4      | 5872   | growth-inhibiting gene 4 protein                           | 0.002418 | 12.94179 |
| DBDR      | 1816   | D1beta dopamine receptor                                   | 0.002444 | 12.83784 |
| SCAR2     | 10163  | suppressor of cyclic-AMP receptor (WASP-family)            | 0.002642 | 12.73389 |
| DKFZp779k | 5291   | PI3-kinase p110 subunit beta                               | 0.00267  | 12.62994 |
| CD202B    | 7010   | TEK tyrosine kinase, endothelial                           | 0.002694 | 12.52599 |
| ATF5      | 22809  | activating transcription factor 5                          | 0.002764 | 12.42204 |
| IB2       | 23542  | mitogen-activated protein kinase 8 interacting protein 2   | 0.002915 | 12.31809 |

|            |        |                                                        |          |          |
|------------|--------|--------------------------------------------------------|----------|----------|
| CTS02      | 1513   | cathepsin K                                            | 0.002917 | 12.21414 |
| C2orf31    | 7855   | seven-transmembrane receptor frizzled-5                | 0.002936 | 12.11019 |
| ELK        | 2047   | ephrin receptor EphB1                                  | 0.002959 | 12.00624 |
| DKFZp566J  | 9039   | UBA3, ubiquitin-activating enzyme E1 homolog           | 0.002965 | 11.85031 |
| A-116A10.1 | 8883   | NEDD8-activating enzyme E1 subunit                     | 0.002965 | 11.85031 |
| DCR1       | 23405  | dicer 1, ribonuclease type III                         | 0.002969 | 11.69439 |
| EN-7       | 5880   | small G protein                                        | 0.002992 | 11.59044 |
| Hs.89862   | 8717   | tumor necrosis factor receptor type 1 associated death | 0.003022 | 11.48649 |
| NGR        | 65078  | Nogo-66 receptor                                       | 0.003026 | 11.38254 |
| GS2        | 5873   | RAB27A, member RAS oncogene family                     | 0.003029 | 11.27859 |
| CDK3       | 1018   | cyclin-dependent kinase 3                              | 0.003183 | 11.17464 |
| EBI6       | 7185   | TNF receptor-associated factor 1                       | 0.003225 | 11.01871 |
| FLJ14993   | 84957  | receptor expressed in lymphoid tissues                 | 0.003225 | 11.01871 |
| HDLCQ12    | 3990   | lipase C                                               | 0.003297 | 10.86279 |
| CCNA1      | 8900   | cyclin A1                                              | 0.003328 | 10.75884 |
| CLEVER-1   | 23166  | common lymphatic endothelial and vascular endothelial  | 0.003531 | 10.65489 |
| FLJ11090   | 55775  | tyrosyl-DNA phosphodiesterase 1                        | 0.003711 | 10.55094 |
| CPLX1      | 10815  | complexin 1                                            | 0.003715 | 10.44699 |
| NEC1       | 5122   | proprotein convertase subtilisin/kexin type 1          | 0.003751 | 10.34304 |
| 53BP1      | 7158   | tumor protein 53-binding protein, 1                    | 0.00382  | 10.23909 |
| DKFZp586C  | 8932   | methyl-CpG binding domain protein 2                    | 0.003849 | 10.13514 |
| ABP1       | 28988  | drebrin-like                                           | 0.003873 | 9.927235 |
| BLK        | 640    | BLK nonreceptor tyrosine kinase                        | 0.003873 | 9.927235 |
| HPK1       | 11184  | hematopoietic progenitor kinase 1                      | 0.003873 | 9.927235 |
| CAS        | 1434   | CSE1 chromosome segregation 1-like protein             | 0.004114 | 9.719335 |
| MGC12657   | 8828   | neuropilin-2a(22)                                      | 0.004477 | 9.615385 |
| CRL        | 133396 | gp130-like monocyte receptor                           | 0.004797 | 9.511435 |
| HDNF       | 4908   | neurotrophin 3                                         | 0.005046 | 9.407484 |
| HEPTP      | 5786   | protein tyrosine phosphatase, receptor type, A         | 0.005127 | 9.303534 |
| NK1R       | 6869   | NK-1 receptor                                          | 0.005314 | 9.199584 |
| KIAA0595   | 23082  | peroxisome proliferator-activated receptor gamma       | 0.005342 | 9.095634 |
| HEB        | 6938   | transcription factor 12                                | 0.005459 | 8.991684 |
| APOER2     | 7804   | apolipoprotein E receptor 2                            | 0.005484 | 8.887734 |
| CK1        | 1452   | down-regulated in lung cancer                          | 0.005515 | 8.783784 |
| DKFZp686C  | 4703   | nebulin                                                | 0.005671 | 8.679834 |
| FLJ12859   | 23528  | ZNP-99 transcription factor                            | 0.005698 | 8.575884 |
| C7orf16    | 10842  | G-substrate                                            | 0.00617  | 8.471933 |
| GEPH       | 10243  | gephyrin                                               | 0.006473 | 8.367983 |
| CALCOCO1   | 57658  | coiled-coil transcriptional coactivator                | 0.00655  | 8.160083 |
| CUL4B      | 8450   | cullin-4B                                              | 0.00655  | 8.160083 |
| DKFZp686C  | 171024 | genethonin 2                                           | 0.00655  | 8.160083 |
| AGS1       | 51655  | dexamethasone-induced ras-related protein 1            | 0.006791 | 7.952183 |
| IHPS1      | 4842   | neuronal nitric oxide synthase                         | 0.00687  | 7.796258 |
| SSTR5      | 6755   | somatostatin receptor subtype 5                        | 0.00687  | 7.796258 |
| AHF        | 2157   | procoagulant component                                 | 0.007174 | 7.640333 |
| EDG-4      | 9170   | lysophosphatidic acid receptor 2                       | 0.007337 | 7.536383 |
| BSF3       | 23529  | B-cell stimulating factor 3                            | 0.007454 | 7.432432 |

|             |                                                                       |          |          |
|-------------|-----------------------------------------------------------------------|----------|----------|
| EVI16       | 6659 SRY (sex determining region Y)-box 4                             | 0.007925 | 7.328482 |
| DLL4        | 54567 notch ligand DLL4                                               | 0.008003 | 7.224532 |
| FES         | 2242 proto-oncogene c-fes variant 4                                   | 0.008012 | 7.120582 |
| ERG1        | 3757 potassium channel HERG1                                          | 0.00831  | 7.016632 |
| FLJ41337    | 8500 PTPRF interacting protein alpha 1                                | 0.008365 | 6.912682 |
| ATSV        | 547 kinesin, heavy chain, member 1A, homolog of mouse                 | 0.008539 | 6.808732 |
| ZBTB33      | 10009 zinc finger and BTB domain containing 33                        | 0.008595 | 6.704782 |
| HEC         | 10403 kinetochore associated 2                                        | 0.008783 | 6.600832 |
| FX          | 7114 thymosin beta 4, X-linked                                        | 0.009461 | 6.444906 |
| MGC26307    | 9087 thymosin beta-4, Y isoform                                       | 0.009461 | 6.444906 |
| ARD1        | 8260 N-acetyltransferase ARD1                                         | 0.009484 | 6.288981 |
| CABP2       | 51475 calcium binding protein 2                                       | 0.009537 | 6.185031 |
| AHH         | 57491 aryl hydrocarbon receptor regulator                             | 0.010417 | 6.081081 |
| 103AS, 15.: | 3805 NK cell receptor                                                 | 0.010804 | 5.977131 |
| LIMS1       | 3987 LIM and senescent cell antigen-like domains 1                    | 0.011092 | 5.873181 |
| HTF9A       | 5902 RAN binding protein 1                                            | 0.011344 | 5.769231 |
| ATBF1       | 463 AT motif-binding factor 1                                         | 0.011379 | 5.665281 |
| B56A        | 5525 serine/threonine protein phosphatase 2A, 56 kDa regulatory subun | 0.011453 | 5.561331 |
| ADORA2      | 136 adenosine A2b receptor                                            | 0.01208  | 5.45738  |
| CTSS        | 1520 cathepsin S                                                      | 0.012228 | 5.35343  |
| APG12       | 9140 Apg12 (autophagy, yeast) homolog                                 | 0.01277  | 5.24948  |
| FLJ14040    | 84148 MYST histone acetyltransferase 1                                | 0.012952 | 5.14553  |
| MGC16699    | 5797 protein tyrosine phosphatase, receptor type, mu polypeptide      | 0.014228 | 4.989605 |
| CD113       | 25945 poliovirus receptor-related 3                                   | 0.014228 | 4.989605 |
| CAIN        | 8021 nucleoporin 214kDa                                               | 0.014459 | 4.781705 |
| 2PP2A       | 6418 template-activating factor I                                     | 0.014459 | 4.781705 |
| ACVRIP1     | 9863 membrane associated guanylate kinase, WW and PDZ                 | 0.014568 | 4.62578  |
| CD158F      | 57292 killer cell immunoglobulin-like receptor, two domains           | 0.014578 | 4.52183  |
| CCL24       | 6369 eotaxin-2                                                        | 0.0146   | 4.417879 |
| ARIX        | 401 arix homeodomain protein                                          | 0.015383 | 4.313929 |
| AD2         | 348 apolipoprotein E3                                                 | 0.015608 | 4.209979 |
| BP          | 3240 binding peptide                                                  | 0.01598  | 4.106029 |
| NR1F2       | 6096 nuclear receptor RZR-beta                                        | 0.016275 | 4.002079 |
| FLJ20819    | 7879 Ras-associated protein RAB7                                      | 0.017196 | 3.898129 |
| MSI1        | 4440 Musashi (Drosophila) homolog 1                                   | 0.018013 | 3.794179 |
| MGC39961    | 10762 nucleoporin 50kDa                                               | 0.018103 | 3.690229 |
| FKHL8       | 2297 forkhead box D1                                                  | 0.018662 | 3.586279 |
| DKFZp781F   | 9788 missing in metastasis                                            | 0.019066 | 3.482328 |
| JDP2        | 122953 Jun dimerization protein 2                                     | 0.019406 | 3.378378 |
| CRSP150     | 9282 human homolog of yeast RGR1                                      | 0.019751 | 3.274428 |
| CNTF        | 1270 ciliary neurotrophic factor                                      | 0.020607 | 3.170478 |
| AIGF        | 2253 androgen-induced growth factor                                   | 0.020754 | 3.066528 |
| KIAA0965    | 23012 serine/threonine kinase 38 like                                 | 0.021827 | 2.962578 |
| MGC12360    | 10605 polyadenylate binding protein-interacting protein 1             | 0.021922 | 2.858628 |
| DKFZp686F   | 5597 extracellular signal-regulated kinase, p97                       | 0.023099 | 2.754678 |
| CD72        | 971 CD72 molecule                                                     | 0.023777 | 2.650728 |
| BACH1       | 571 BTB and CNC homology 1, basic leucine zipper transcription        | 0.024841 | 2.546778 |

|           |                                                                    |          |          |
|-----------|--------------------------------------------------------------------|----------|----------|
| CRF2-9    | 58985 interleukin 22 receptor, alpha 1                             | 0.025025 | 2.338877 |
| DIRS1     | 53833 interleukin-20 receptor II                                   | 0.025025 | 2.338877 |
| FLJ40993  | 53832 class II cytokine receptor ZCYTOR7                           | 0.025025 | 2.338877 |
| DKFZp686F | 6876 SM22-alpha                                                    | 0.025435 | 2.130977 |
| HHR23B    | 5887 XP-C repair complementing complex 58 kDa                      | 0.02789  | 1.715177 |
| LPP       | 4026 LIM domain containing preferred translocation partner         | 0.02789  | 1.715177 |
| PCTP      | 58488 phosphatidylcholine transfer protein                         | 0.02789  | 1.715177 |
| KARS      | 3735 lysyl-tRNA synthetase                                         | 0.02789  | 1.715177 |
| FLJ00280  | 6256 retinoid X receptor, alpha                                    | 0.02789  | 1.715177 |
| FLJ30414  | 3094 histidine triad nucleotide binding protein 1                  | 0.02789  | 1.715177 |
| CHA       | 10732 transcription factor-like 5 (basic helix-loop-helix)         | 0.02789  | 1.715177 |
| CD3E      | 916 CD3e antigen, epsilon polypeptide (TiT3 complex)               | 0.029458 | 1.299376 |
| PLS3      | 5358 T isoform                                                     | 0.029943 | 1.195426 |
| 2310020H2 | 23479 nitrogen fixation cluster-like                               | 0.030779 | 1.091476 |
| CUL5      | 8065 Vasopressin-activated calcium-mobilizing receptor-1           | 0.032255 | 0.987526 |
| CLCR      | 11330 elastase IV                                                  | 0.033248 | 0.883576 |
| GGA3      | 23163 Golgi-localized, gamma ear-containing, ARF-binding protein 3 | 0.033895 | 0.779626 |
| GLK       | 8491 germinal center kinase-related protein kinase                 | 0.034452 | 0.675676 |
| ACT1      | 10758 TRAF3 interacting protein 2                                  | 0.036332 | 0.571726 |
| DKFZp586I | 8498 RAN-binding protein-3                                         | 0.039071 | 0.467775 |
| CC10      | 7356 Uteroglobin (Clara-cell specific 10-kD protein)               | 0.040149 | 0.363825 |
| MGC10268  | 6494 GTPase-activating protein Spa-1                               | 0.041484 | 0.259875 |
| PROP1     | 5626 prophet of Pit1, paired-like homeodomain transcription        | 0.045909 | 0.155925 |
| DCOH      | 5092 Pterin-4a-carbinolamine dehydratase                           | 0.047466 | 0.051975 |

**Topologically significant genes determined from proteomics data**

| <b>Symbol</b> | <b>Entrez_ID</b> | <b>Description</b>                                           | <b>p value</b> | <b>percentile</b> |
|---------------|------------------|--------------------------------------------------------------|----------------|-------------------|
| MYC           | 4609             | myc proto-oncogene protein                                   | 2.15E-08       | 99.82669          |
| HIRS-1        | 3667             | insulin receptor substrate 1                                 | 1.85E-07       | 99.74003          |
| BCL2          | 596              | B-cell CLL/lymphoma 2                                        | 4.21E-07       | 99.56672          |
| INSRR         | 3645             | IR-related receptor                                          | 4.34E-07       | 99.39341          |
| MGC26306      | 9414             | tight junction protein 2 (zona occludens 2)                  | 4.38E-07       | 99.2201           |
| GCCR          | 2908             | glucocorticoid receptor                                      | 5.98E-07       | 99.04679          |
| IRF-1         | 3659             | interferon regulatory factor-1                               | 1.01E-06       | 98.87348          |
| SREBF1        | 6720             | sterol regulatory element binding transcription factor 1     | 1.06E-06       | 98.70017          |
| FLJ12859      | 23528            | ZNP-99 transcription factor                                  | 1.1E-06        | 98.52686          |
| ETV3          | 2117             | ets variant gene 3, ETS family transcriptional repressor     | 1.12E-06       | 98.35355          |
| ELK4          | 2005             | SRF accessory protein 1                                      | 1.15E-06       | 98.18024          |
| MGC11154      | 5879             | migration-inducing gene 5                                    | 1.31E-06       | 98.00693          |
| TCF-3         | 83439            | transcription factor 7-like 1 (T-cell specific, HMG-box)     | 1.47E-06       | 97.487            |
| FLJ36364      | 6932             | transcription factor 7 (T-cell specific, HMG-box)            | 1.47E-06       | 97.487            |
| TCF-4         | 6934             | transcription factor 7-like 2 (T-cell specific, HMG-box)     | 1.47E-06       | 97.487            |
| DKFZp686E     | 6772             | signal transducer and activator of transcription-1           | 1.47E-06       | 97.487            |
| DKFZp586F     | 51176            | lymphoid enhancer binding factor-1                           | 1.47E-06       | 97.487            |
| E2F-5         | 1875             | E2F transcription factor 5, p130-binding                     | 1.56E-06       | 96.96707          |
| HNRPE1        | 5093             | poly(rC)-binding protein 1                                   | 1.68E-06       | 96.79376          |
| FLJ36302      | 7074             | T-cell lymphoma invasion and metastasis 1                    | 1.78E-06       | 96.62045          |
| AMPH2         | 274              | bridging integrator 1                                        | 1.79E-06       | 96.44714          |
| ARF           | 1029             | multiple tumor suppressor 1                                  | 1.82E-06       | 96.27383          |
| EPHEXIN       | 25791            | ephexin                                                      | 1.9E-06        | 96.10052          |
| GSK3B         | 2932             | glycogen synthase kinase 3 beta                              | 1.94E-06       | 95.84055          |
| DKFZp686E     | 2931             | glycogen synthase kinase 3 alpha                             | 1.94E-06       | 95.84055          |
| NOR-90        | 7343             | upstream binding transcription factor, RNA polymerase I      | 1.99E-06       | 95.58059          |
| DKFZp779K     | 5291             | PI3-kinase p110 subunit beta                                 | 2.21E-06       | 95.40728          |
| GRIN1         | 2902             | glutamate [NMDA] receptor subunit zeta 1                     | 2.29E-06       | 95.23397          |
| FLJ12099      | 5602             | mitogen-activated protein kinase 10                          | 2.35E-06       | 95.06066          |
| CAP20         | 1026             | CDK-interaction protein 1                                    | 2.36E-06       | 94.88735          |
| MYD88         | 4615             | myeloid differentiation primary response gene 88             | 2.46E-06       | 94.71404          |
| LYT-10        | 4791             | nuclear factor of kappa light chain gene enhancer in B-cells | 3.26E-06       | 94.54073          |
| AIS           | 367              | androgen receptor                                            | 3.3E-06        | 94.36742          |
| DKFZp781F     | 9788             | missing in metastasis                                        | 3.31E-06       | 94.19411          |
| PLZF          | 7704             | zinc finger protein 145 (Kruppel-like)                       | 3.49E-06       | 94.0208           |
| DELTA         | 7528             | YY1 transcription factor                                     | 3.75E-06       | 93.84749          |
| FBL1          | 6502             | CDK2/cyclin A-associated protein p45                         | 3.84E-06       | 93.67418          |
| BMK1          | 5598             | mitogen-activated protein kinase 7                           | 4.07E-06       | 93.50087          |
| PIM           | 5292             | Oncogene PIM1                                                | 4.31E-06       | 93.32756          |
| CBF1          | 3516             | recombining binding protein suppressor of hairless           | 4.44E-06       | 93.15425          |
| MYL           | 5371             | promyelocytic leukemia, inducer of                           | 4.6E-06        | 92.98094          |
| HsT17454      | 5607             | MAP kinase kinase MEK5b                                      | 4.72E-06       | 92.80763          |
| ARP1          | 5308             | solurshin                                                    | 4.98E-06       | 92.63432          |
| CHEDG1        | 1901             | sphingosine 1-phosphate receptor EDG1                        | 5E-06          | 92.46101          |
| DPC4          | 4089             | mothers against decapentaplegic homolog 4                    | 5.15E-06       | 92.28769          |

|           |                                                                 |          |          |
|-----------|-----------------------------------------------------------------|----------|----------|
| BHLHB2    | 8553 differentially expressed in chondrocytes 1                 | 5.34E-06 | 92.11438 |
| ETS2      | 2114 oncogene ETS-2                                             | 6.23E-06 | 91.94107 |
| ENX-1     | 2146 enhancer of zeste homolog 2 (Drosophila)                   | 6.28E-06 | 91.76776 |
| ERYF1     | 2623 NF-E1 DNA-binding protein                                  | 6.31E-06 | 91.59445 |
| NOTCH1    | 4851 neurogenic locus notch homolog protein 1                   | 6.62E-06 | 91.42114 |
| DKFZp686F | 3065 histone deacetylase 1                                      | 6.65E-06 | 91.24783 |
| HSF1      | 3297 heat shock transcription factor 1                          | 6.67E-06 | 91.07452 |
| ARF6      | 382 ADP-ribosylation factor 6                                   | 6.8E-06  | 90.90121 |
| CEBP      | 64506 cytoplasmic polyadenylation element binding protein 1     | 6.85E-06 | 90.55459 |
| AAA       | 351 amyloid beta A4 protein                                     | 6.85E-06 | 90.55459 |
| NGR       | 65078 Nogo-66 receptor                                          | 6.85E-06 | 90.55459 |
| CCNE      | 898 cyclin Es                                                   | 7.18E-06 | 90.12132 |
| FLJ10671  | 8295 350/400 kDa PCAF-associated factor                         | 7.18E-06 | 90.12132 |
| HA6116    | 9759 histone deacetylase 4                                      | 7.47E-06 | 89.86135 |
| BSP1      | 4086 MAD, mothers against decapentaplegic homolog 1             | 7.6E-06  | 89.68804 |
| CDC25     | 5923 Ras-specific nucleotide exchange factor CDC25              | 7.67E-06 | 89.51473 |
| AHR       | 196 aromatic hydrocarbon receptor                               | 7.84E-06 | 89.34142 |
| CLOCK     | 9575 clock homolog (mouse)                                      | 7.91E-06 | 89.16811 |
| G0S24     | 7538 zinc finger protein, C3H type, 36 homolog (mouse)          | 7.98E-06 | 88.9948  |
| CDC18L    | 990 CDC18 (cell division cycle 18, S.pombe, homolog)-like       | 7.98E-06 | 88.82149 |
| ARR3      | 407 cone arrestin                                               | 8.47E-06 | 88.64818 |
| GNB1      | 2782 transducin beta chain 1                                    | 8.77E-06 | 88.2149  |
| GNG11     | 2791 guanine nucleotide-binding protein G(I)/G(S)/G(O)          | 8.77E-06 | 88.2149  |
| KIAA1415  | 57580 phosphatidylinositol-3,4,5-trisphosphate-dependent Rac    | 8.77E-06 | 88.2149  |
| G(gamma): | 51764 guanine nucleotide binding protein (G protein), gamma 13  | 8.77E-06 | 88.2149  |
| PP2CB     | 5516 serine/threonine protein phosphatase 2A, catalytic subunit | 8.9E-06  | 87.69497 |
| PP2Ac     | 5515 protein phosphatase 2, catalytic subunit, alpha isoform    | 8.9E-06  | 87.69497 |
| MGC11121  | 4831 non-metastatic cells 2, protein (NM23) expressed in        | 1.02E-05 | 87.43501 |
| E2F-4     | 1874 E2F transcription factor 4                                 | 1.02E-05 | 87.2617  |
| FLJ25596  | 6655 son of sevenless homolog 2                                 | 1.06E-05 | 87.00173 |
| GF1       | 6654 son of sevenless homolog 1                                 | 1.06E-05 | 87.00173 |
| KIAA1515  | 57646 ubiquitin specific protease 28                            | 1.07E-05 | 86.74177 |
| PAK2      | 5062 p21-activated kinase 2                                     | 1.08E-05 | 86.56846 |
| BAF170    | 6601 SWI3-like protein                                          | 1.09E-05 | 86.39515 |
| C21       | 79718 transducin (beta)-like 1X-linked receptor 1               | 1.1E-05  | 86.22184 |
| CRD-BP    | 10642 insulin-like growth factor 2 mRNA binding protein 1       | 1.12E-05 | 86.04853 |
| IPOA1     | 3838 karyopherin alpha 2                                        | 1.13E-05 | 85.87522 |
| Hs.54452  | 10320 Ikaros (zinc finger protein)                              | 1.14E-05 | 85.70191 |
| AGO       | 55294 F-box and WD-40 domain protein 7 (archipelago homolog)    | 1.17E-05 | 85.5286  |
| DKFZp686C | 4790 nuclear factor kappa-B, subunit 1                          | 1.2E-05  | 85.35529 |
| ASCL1     | 429 achaete-scute homolog 1                                     | 1.23E-05 | 85.18198 |
| D6S182    | 3326 heat shock 90kDa protein 1, beta                           | 1.25E-05 | 85.00867 |
| BP-8      | 4904 nuclease sensitive element binding protein 1               | 1.3E-05  | 84.83536 |
| ABD-B     | 3205 homeo box A9                                               | 1.31E-05 | 84.66205 |
| MAX       | 4149 MAX protein                                                | 1.31E-05 | 84.48873 |
| POMP100   | 6421 polypyrimidine tract-binding protein-associated splicing   | 1.33E-05 | 84.31542 |
| CLGI      | 7076 fibroblast collagenase inhibitor                           | 1.34E-05 | 84.14211 |

|             |        |                                                            |          |          |
|-------------|--------|------------------------------------------------------------|----------|----------|
| FOG         | 161882 | friend of GATA-1                                           | 1.37E-05 | 83.9688  |
| HNRNPU      | 3192   | heterogeneous nuclear ribonucleoprotein U                  | 1.38E-05 | 83.79549 |
| ESA1        | 10524  | cPLA2 interacting protein                                  | 1.44E-05 | 83.62218 |
| FBP         | 8880   | far upstream element-binding protein                       | 1.47E-05 | 83.44887 |
| AWD         | 4830   | NDP kinase A                                               | 1.54E-05 | 83.27556 |
| MSP23       | 5052   | peroxiredoxin 1                                            | 1.58E-05 | 83.10225 |
| HD3         | 8841   | histone deacetylase 3                                      | 1.65E-05 | 82.92894 |
| CASP8AP2    | 9994   | human FLASH                                                | 1.67E-05 | 82.75563 |
| EAP1        | 9232   | ESP1-associated protein 1                                  | 1.68E-05 | 82.58232 |
| ELK1        | 2002   | ELK1 protein                                               | 1.75E-05 | 82.40901 |
| ENO1        | 2023   | phosphopyruvate hydratase                                  | 1.78E-05 | 82.2357  |
| B1F         | 2494   | liver receptor homolog-1                                   | 1.81E-05 | 82.06239 |
| GLUH1       | 2890   | glutamate receptor, ionotropic, AMPA 1                     | 1.82E-05 | 81.80243 |
| DKFZp781f   | 5924   | Ras protein-specific guanine nucleotide-releasing factor 2 | 1.82E-05 | 81.80243 |
| FLJ16691    | 5829   | paxillin                                                   | 1.85E-05 | 81.54246 |
| C/EBP-beta  | 1051   | transcription factor 5                                     | 1.92E-05 | 81.36915 |
| KPD         | 5078   | paired box gene 4                                          | 1.97E-05 | 81.19584 |
| ACVRLK3     | 657    | bone morphogenetic protein receptor, type IA               | 2.01E-05 | 81.02253 |
| NR111       | 7421   | vitamin D (1,25-dihydroxyvitamin D3) receptor              | 2.07E-05 | 80.84922 |
| AT225       | 1958   | zinc finger protein 225                                    | 2.11E-05 | 80.67591 |
| C/EBP-alpha | 1050   | CCAAT/enhancer binding protein alpha                       | 2.12E-05 | 80.5026  |
| DKFZp586n   | 4088   | mad homolog JV15-2                                         | 2.21E-05 | 80.32929 |
| CD126       | 3570   | interleukin 6 receptor alpha subunit                       | 2.22E-05 | 80.06932 |
| CD221       | 3480   | insulin-like growth factor 1 receptor                      | 2.22E-05 | 80.06932 |
| ARNTL       | 406    | basic-helix-loop-helix-PAS orphan MOP3                     | 2.26E-05 | 79.80936 |
| HOX-2.6     | 3214   | homeobox B4                                                | 2.29E-05 | 79.63605 |
| HES5        | 388585 | hairy and enhancer of split 5 (Drosophila)                 | 2.3E-05  | 79.46274 |
| IRF3        | 3661   | interferon regulatory factor 3                             | 2.43E-05 | 79.28943 |
| AUF1        | 3184   | heterogeneous nuclear ribonucleoprotein D (AU-rich)        | 2.59E-05 | 79.11612 |
| CD49f       | 3655   | integrin alpha6B                                           | 2.67E-05 | 78.85615 |
| CD104       | 3691   | GP150                                                      | 2.67E-05 | 78.85615 |
| DKFZp686F   | 3611   | integrin-linked kinase                                     | 2.72E-05 | 78.59619 |
| MAZ         | 4150   | zinc-finger protein, 87 kilodaltons                        | 2.83E-05 | 78.42288 |
| I-REL       | 5971   | v-rel avian reticuloendotheliosis viral oncogene homolog B | 3E-05    | 78.24957 |
| ARA24       | 5901   | ras-related nuclear protein                                | 3.16E-05 | 77.9896  |
| CHC1        | 1104   | regulator of chromosome condensation 1                     | 3.16E-05 | 77.9896  |
| GIG34       | 6135   | 60S ribosomal protein L11                                  | 3.22E-05 | 77.72964 |
| MGC13844    | 4772   | nuclear factor of activated T-cells, cytoplasmic           | 3.26E-05 | 77.55633 |
| E2F-1       | 1869   | retinoblastoma-associated protein 1                        | 3.26E-05 | 77.38302 |
| FLJ94509    | 2672   | zinc finger protein 163                                    | 3.34E-05 | 77.20971 |
| DTR         | 1839   | heparin-binding epidermal growth factor                    | 3.38E-05 | 77.0364  |
| BAPX2       | 4824   | NK3 homeobox 1                                             | 3.44E-05 | 76.86308 |
| AAP1        | 23429  | ring1 interactor RYBP                                      | 3.44E-05 | 76.68977 |
| C1          | 3183   | heterogeneous nuclear ribonucleoprotein C (C1/C2)          | 3.48E-05 | 76.51646 |
| BLIMP1      | 639    | beta-interferon gene positive-regulatory domain I binding  | 3.58E-05 | 76.34315 |
| EMT         | 3702   | tyrosine-protein kinase ITK/TSK                            | 3.86E-05 | 76.16984 |
| E2F-6       | 1876   | E2F transcription factor 6, isoform 1                      | 3.9E-05  | 75.99653 |



|            |                                                                 |          |          |
|------------|-----------------------------------------------------------------|----------|----------|
| BRCA1      | 672 breast and ovarian cancer susceptibility protein 1          | 4.12E-05 | 75.82322 |
| MGC88021   | 5187 circadian pacemaker protein RIGUI                          | 4.14E-05 | 75.64991 |
| BCL3       | 602 B-cell leukemia/lymphoma 3                                  | 4.15E-05 | 75.4766  |
| MAD2       | 4601 Max-related transcription factor                           | 4.33E-05 | 75.30329 |
| DKFZp434k  | 25942 transcriptional regulator, SIN3A                          | 4.78E-05 | 75.12998 |
| MSI1       | 4440 Musashi (Drosophila) homolog 1                             | 4.85E-05 | 74.95667 |
| ADRBK1     | 156 beta adrenergic receptor kinase 1                           | 4.91E-05 | 74.78336 |
| BORIS      | 140690 CCCTC-binding factor-like protein                        | 5.02E-05 | 74.61005 |
| Cmyb       | 4602 c-myb13A_CDS                                               | 5.05E-05 | 74.43674 |
| GIG8       | 3398 cell growth-inhibiting gene 8                              | 5.1E-05  | 74.26343 |
| MGC11098   | 6622 non A4 component of amyloid                                | 5.16E-05 | 74.09012 |
| GEFT       | 115557 RAC/CDC42 exchange factor                                | 5.25E-05 | 73.91681 |
| ARNO       | 9266 cytohesin 2                                                | 5.27E-05 | 73.7435  |
| DFNB24     | 5962 deafness, autosomal recessive 24                           | 5.38E-05 | 73.57019 |
| VAV2       | 7410 Protein vav-2                                              | 5.4E-05  | 73.39688 |
| SREBF2     | 6721 sterol regulatory element-binding protein 2                | 5.69E-05 | 73.22357 |
| CTS02      | 1513 cathepsin K                                                | 5.77E-05 | 73.05026 |
| FLJ44809   | 2475 FKBP12-rapamycin complex-associated protein 1              | 5.89E-05 | 72.87695 |
| RRAS       | 6237 Oncogene RRAS                                              | 5.96E-05 | 72.70364 |
| H-ICSBP    | 3394 interferon consensus sequence binding protein 1            | 5.99E-05 | 72.53033 |
| CDK4I      | 1030 cyclin-dependent kinases 4 and 6 binding protein           | 6.14E-05 | 72.35702 |
| MGC13000   | 5058 p21/Cdc42/Rac1-activated kinase 1 (STE20 homolog, yeast)   | 6.16E-05 | 72.18371 |
| BAG-6      | 7917 scythe                                                     | 6.24E-05 | 72.0104  |
| BAF190     | 6595 SWI/SNF-related matrix-associated actin-dependent          | 6.33E-05 | 71.83709 |
| GP145-TrkI | 4915 neurotrophic tyrosine kinase, receptor, type 2             | 6.39E-05 | 71.66378 |
| ARVD12     | 3728 catenin (cadherin-associated protein), gamma (80kD)        | 6.4E-05  | 71.49047 |
| DKFZp547c  | 25970 SH2B adaptor protein 1                                    | 6.4E-05  | 71.31716 |
| GRF-1      | 2909 glucocorticoid receptor DNA binding factor 1               | 6.56E-05 | 71.14385 |
| CSBP       | 3190 transformation upregulated nuclear protein                 | 6.57E-05 | 70.97054 |
| GNA12      | 2768 guanine nucleotide binding protein (G protein) alpha 12    | 6.58E-05 | 70.79723 |
| ARNO3      | 9265 general receptor of phosphoinositides 1                    | 6.7E-05  | 70.62392 |
| APLP       | 333 amyloid-like protein 1                                      | 6.8E-05  | 70.45061 |
| APKD2      | 5311 polycystic kidney disease 2 (autosomal dominant)           | 6.94E-05 | 70.2773  |
| ANF        | 8820 homeobox, ES cell expressed 1                              | 7.61E-05 | 70.01733 |
| KIAA1047   | 9611 nuclear receptor co-repressor 1                            | 7.61E-05 | 70.01733 |
| KCIP-1     | 7534 phospholipase A2                                           | 7.62E-05 | 69.75737 |
| ELK3       | 2004 SRF accessory protein 2                                    | 7.82E-05 | 69.58406 |
| MGC13177   | 5970 v-rel avian reticuloendotheliosis viral oncogene homolog A | 8.09E-05 | 69.41075 |
| CTCF       | 10664 CTCFL paralog                                             | 8.16E-05 | 69.23744 |
| CD295      | 3953 leptin receptor                                            | 8.44E-05 | 69.06412 |
| DBK        | 5585 serine-threonine kinase N                                  | 8.57E-05 | 68.89081 |
| NOV        | 5361 plexin 1                                                   | 9.41E-05 | 68.7175  |
| ASCL2      | 430 achaete-scute complex-like 2                                | 9.6E-05  | 68.54419 |
| GNG1       | 2792 guanine nucleotide binding protein (G protein)             | 9.68E-05 | 68.37088 |
| BOS3       | 6495 SIX homeobox 1                                             | 0.0001   | 68.19757 |
| CINC-2a    | 2920 chemokine (C-X-C motif) ligand 2                           | 0.000101 | 68.02426 |
| 60B8AG     | 6279 cystic fibrosis antigen                                    | 0.000102 | 67.85095 |

|           |       |                                                            |          |          |
|-----------|-------|------------------------------------------------------------|----------|----------|
| MGC33401  | 7073  | TIA1 cytotoxic granule-associated RNA-binding protein-like | 0.000109 | 67.67764 |
| MIZ-1     | 7709  | zinc finger protein 151 (pHZ-67)                           | 0.000112 | 67.50433 |
| AAT5      | 7046  | transforming growth factor beta receptor I                 | 0.000114 | 67.33102 |
| APRF      | 6774  | DNA-binding protein APRF                                   | 0.000116 | 67.15771 |
| CKBBP2    | 90480 | papillomavirus L2 interacting nuclear protein 1            | 0.000116 | 66.9844  |
| ALK-6     | 658   | bone morphogenetic protein receptor, type IB               | 0.000117 | 66.81109 |
| ASIP      | 56288 | atypical PKC isotype-specific interacting protein          | 0.000127 | 66.63778 |
| EZF       | 9314  | endothelial Kruppel-like zinc finger protein               | 0.000128 | 66.46447 |
| DOCK1     | 1793  | dedicator of cyto-kinesis 1                                | 0.00013  | 66.11785 |
| DOCK2     | 1794  | dedicator of cytokinesis 2                                 | 0.00013  | 66.11785 |
| CED-12    | 9844  | engulfment and cell motility 1                             | 0.00013  | 66.11785 |
| MGC10556  | 7205  | zyxin related protein 1                                    | 0.000142 | 65.77123 |
| C1Q-C     | 714   | complement component 1, q subcomponent, C chain            | 0.000149 | 65.42461 |
| C1QB      | 713   | complement component 1, q subcomponent                     | 0.000149 | 65.42461 |
| C1QA      | 712   | complement component C1q, A chain                          | 0.000149 | 65.42461 |
| FLJ20819  | 7879  | Ras-associated protein RAB7                                | 0.000151 | 65.07799 |
| MGC11118  | 5645  | trypsin 2                                                  | 0.000159 | 64.73137 |
| MTG       | 5646  | trypsin 3                                                  | 0.000159 | 64.73137 |
| MGC12017  | 5644  | nonfunctional trypsin 1                                    | 0.000159 | 64.73137 |
| ARF-BP1   | 10075 | ARF binding protein 1                                      | 0.000163 | 64.38475 |
| FKHL16    | 2305  | Forkhead, drosophila, homolog-like 16                      | 0.000165 | 64.21144 |
| FLJ41865  | 26230 | T-cell lymphoma invasion and metastasis 2                  | 0.00017  | 63.95147 |
| FARP2     | 9855  | FGD1-related Cdc42-GEF                                     | 0.00017  | 63.95147 |
| ERBB2IP   | 55914 | ERBB2 interacting protein                                  | 0.000177 | 63.69151 |
| HDAC2     | 3066  | YY1-associated factor 1                                    | 0.000177 | 63.5182  |
| MKNK1     | 8569  | MAP kinase interacting serine/threonine kinase 1           | 0.000178 | 63.34489 |
| DKFZp313L | 2934  | gelsolin (amyloidosis, Finnish type)                       | 0.000181 | 63.17158 |
| ANCR      | 7337  | ubiquitin protein ligase E3A                               | 0.000183 | 62.99827 |
| PTP-PEST  | 5782  | protein-tyrosine phosphatase G1                            | 0.000184 | 62.82496 |
| MTA1      | 9112  | metastasis associated protein                              | 0.000185 | 62.65165 |
| MAP3K11   | 4296  | mitogen-activated protein kinase kinase kinase 11          | 0.000187 | 62.47834 |
| BBC3      | 27113 | BCL2 binding component 3                                   | 0.000187 | 62.30503 |
| JNK       | 5599  | stress-activated protein kinase JNK1                       | 0.000189 | 62.13172 |
| BID       | 637   | BID isoform Si6                                            | 0.00019  | 61.95841 |
| BAM       | 10018 | bcl-2 interacting protein Bim                              | 0.000192 | 61.7851  |
| ARNT      | 405   | dioxin receptor, nuclear translocator                      | 0.000195 | 61.61179 |
| FKBP38    | 23770 | FK506 binding protein 8, 38kDa                             | 0.000195 | 61.43847 |
| DKFZp686C | 5148  | rod cG-PDE G                                               | 0.000195 | 61.17851 |
| CSNBAD3   | 2779  | transducin alpha-1 chain                                   | 0.000195 | 61.17851 |
| ARHGEF14  | 23263 | MCF2 transforming sequence-like protein                    | 0.000205 | 60.91854 |
| FLJ16302  | 4855  | Notch homolog 4 (Drosophila)                               | 0.00021  | 60.74523 |
| GCN5      | 2648  | GCN5 general control of amino-acid synthesis 5-like 2      | 0.00021  | 60.57192 |
| AG2S      | 185   | angiotensin receptor 1B                                    | 0.000213 | 60.39861 |
| CD281     | 7096  | Toll/interleukin-1 receptor-like                           | 0.000216 | 60.2253  |
| ARHGEF2   | 9181  | rho/rac guanine nucleotide exchange factor (GEF) 2         | 0.000218 | 60.05199 |
| ATOD4     | 9021  | suppressor of cytokine signaling 3                         | 0.00022  | 59.87868 |
| ARH6      | 388   | oncogene RHO H6                                            | 0.000222 | 59.70537 |

|           |       |                                                             |          |          |
|-----------|-------|-------------------------------------------------------------|----------|----------|
| AT-V1     | 4683  | p95 protein of the MRE11/RAD50 complex                      | 0.000233 | 59.44541 |
| H2A.X     | 3014  | H2AX histone                                                | 0.000233 | 59.44541 |
| CALNB1    | 5534  | protein phosphatase 3, regulatory subunit B, alpha isoform  | 0.00024  | 59.09879 |
| PPP3R2    | 5535  | protein phosphatase 3, regulatory subunit B (calcineurin B) | 0.00024  | 59.09879 |
| ACVRIP1   | 9863  | membrane associated guanylate kinase                        | 0.00025  | 58.83882 |
| 2-5-3p    | 23265 | exocyst complex component 7                                 | 0.000256 | 58.66551 |
| CRES      | 10047 | cystatin-related epididymal spermatogenic protein           | 0.000259 | 58.40555 |
| NEC2      | 5126  | subtilisin-like prohormone convertases                      | 0.000259 | 58.40555 |
| AR1       | 6942  | stromelysin-1 platelet-derived growth factor-responsive     | 0.00026  | 58.14558 |
| CD124     | 3566  | interleukin-4 receptor alpha chain                          | 0.000264 | 57.88562 |
| CD132     | 3561  | common cytokine receptor gamma chain                        | 0.000264 | 57.88562 |
| KIAA0407  | 5364  | plexin B1                                                   | 0.000268 | 57.62565 |
| HsT18964  | 22801 | integrin, alpha 11                                          | 0.000275 | 57.36568 |
| CD29      | 3688  | integrin beta 1                                             | 0.000275 | 57.36568 |
| CIS1      | 8651  | STAT induced SH3 protein 1                                  | 0.000276 | 57.10572 |
| DOCK7     | 85440 | dedicator of cytokinesis 7                                  | 0.000277 | 56.93241 |
| NF-E2     | 4778  | nuclear factor (erythroid-derived 2), 45kDa                 | 0.000281 | 56.7591  |
| ACTRIB    | 91    | serine(threonine) protein kinase receptor R2                | 0.000281 | 56.58579 |
| DVL2      | 1856  | dishevelled 2                                               | 0.000282 | 56.41248 |
| DKFZp547J | 1995  | Hu antigen C                                                | 0.00029  | 56.23917 |
| ANCCA     | 29028 | ATPase family, AAA domain containing 2                      | 0.000294 | 56.06586 |
| DKFZp781I | 4914  | neurotrophic tyrosine kinase, receptor, type 1              | 0.000306 | 55.89255 |
| CD120a    | 7132  | tumor necrosis factor receptor type 1                       | 0.000312 | 55.71924 |
| CCND2     | 894   | cyclin D2                                                   | 0.000321 | 55.54593 |
| MGC12953  | 6097  | nuclear receptor ROR-gamma                                  | 0.000322 | 55.37262 |
| FKLF      | 8462  | Kruppel-like factor 11                                      | 0.000339 | 55.19931 |
| BCGF-1    | 3565  | B cell growth factor 1                                      | 0.000343 | 55.026   |
| DKFZp781F | 80314 | enhancer of polycomb 1                                      | 0.000344 | 54.85269 |
| ABC-1     | 19    | ATP binding cassette transporter 1                          | 0.000346 | 54.59272 |
| GIF       | 4282  | phenylpyruvate tautomerase                                  | 0.000346 | 54.59272 |
| DBL       | 4168  | Oncogene MCF2 (oncogene DBL)                                | 0.000348 | 54.33276 |
| CRS2      | 4488  | msh homeobox 2                                              | 0.00035  | 54.15945 |
| CK2A2     | 1459  | casein kinase 2, alpha prime polypeptide                    | 0.00035  | 53.98614 |
| VASP      | 7408  | vasodilator-stimulated phosphoprotein                       | 0.000357 | 53.81282 |
| CUL4B     | 8450  | cullin-4B                                                   | 0.000358 | 53.63951 |
| CP107     | 5933  | retinoblastoma-like 1 (p107)                                | 0.000363 | 53.4662  |
| ACTRIIB   | 93    | activin A type IIB receptor                                 | 0.000382 | 53.29289 |
| CHNG1     | 7253  | thyroid stimulating hormone receptor                        | 0.000386 | 53.11958 |
| IRF4      | 3662  | interferon regulatory factor 4                              | 0.000387 | 52.94627 |
| FLJ12850  | 57650 | KIAA1524                                                    | 0.000392 | 52.77296 |
| MGC41878  | 5579  | protein kinase C, beta 1                                    | 0.000394 | 52.59965 |
| DUET      | 8997  | serine/threonine kinase with Dbl- and pleckstrin homology   | 0.0004   | 52.42634 |
| IRAK      | 3654  | interleukin-1 receptor-associated kinase 1                  | 0.000401 | 52.25303 |
| ARHGEF7   | 8874  | rho guanine nucleotide exchange factor 7                    | 0.000407 | 52.07972 |
| ERK       | 5594  | protein tyrosine kinase ERK2                                | 0.000413 | 51.81976 |
| ERK1      | 5595  | extracellular signal-regulated kinase 1                     | 0.000413 | 51.81976 |
| CRC18     | 1630  | deleted in colorectal cancer protein                        | 0.000432 | 51.55979 |

|           |       |                                                             |          |          |
|-----------|-------|-------------------------------------------------------------|----------|----------|
| CARD3     | 8767  | CARD-containing interleukin-1 beta-converting enzyme        | 0.000442 | 51.38648 |
| ARHG      | 391   | ras homolog gene family, member G (rho G)                   | 0.000446 | 51.03986 |
| GDS1      | 5910  | RAP1, GTP-GDP dissociation stimulator 1                     | 0.000446 | 51.03986 |
| DOCK4     | 9732  | dedicator of cytokinesis 4                                  | 0.000446 | 51.03986 |
| BNSP      | 6696  | SPP1/CALPHA1 fusion                                         | 0.000464 | 50.69324 |
| 60B8AG    | 6280  | calgranulin B                                               | 0.000466 | 50.51993 |
| DVL3      | 1857  | dishevelled 3                                               | 0.000467 | 50.34662 |
| DKFZp686C | 8848  | transforming growth factor beta-stimulated protein TSC-22   | 0.000487 | 50.17331 |
| BCAR1     | 9564  | Cas scaffolding protein family member 1                     | 0.000488 | 50       |
| B56A      | 5525  | serine/threonine protein phosphatase 2A, 56 kDa regulatory  | 0.000488 | 49.82669 |
| NMI       | 9111  | N-myc-interactor                                            | 0.000512 | 49.65338 |
| BM600     | 3909  | epiligrin alpha 3 subunit                                   | 0.000529 | 49.39341 |
| CD49C     | 3675  | very late activation protein 3 receptor, alpha-3 subunit    | 0.000529 | 49.39341 |
| CDCD1     | 4000  | limb girdle muscular dystrophy 1B (autosomal dominant)      | 0.000529 | 49.13345 |
| CSK       | 1445  | c-src tyrosine kinase                                       | 0.000532 | 48.96014 |
| FLJ25655  | 5885  | nuclear matrix protein 1                                    | 0.000541 | 48.70017 |
| ESP1      | 9700  | extra spindle poles like 1                                  | 0.000541 | 48.70017 |
| ARHGAP5   | 394   | p100 RasGAP-associated p105 protein                         | 0.000553 | 48.44021 |
| ECK       | 1969  | protein tyrosine kinase                                     | 0.000556 | 48.2669  |
| GPRC1E    | 2915  | glutamate receptor, metabotropic 5                          | 0.000571 | 48.09359 |
| GIOT-1    | 92283 | zinc finger protein 461                                     | 0.000584 | 47.92028 |
| MGC12565  | 5581  | protein kinase C, epsilon                                   | 0.000595 | 47.74697 |
| APBB1     | 322   | amyloid beta (A4) precursor protein-binding, family B       | 0.000598 | 47.57366 |
| ARID1A    | 8289  | SWI/SNF related, matrix associated                          | 0.000609 | 47.40035 |
| KIAA1119  | 4645  | myosin VB                                                   | 0.000612 | 47.22704 |
| APRO6     | 10140 | transducer of ERBB2, 1                                      | 0.000615 | 47.05373 |
| DKFZp686A | 3146  | high-mobility group (nonhistone chromosomal) protein 1      | 0.00062  | 46.79376 |
| HMG2      | 3148  | high-mobility group box 2                                   | 0.00062  | 46.79376 |
| FLJ97193  | 10023 | proto-oncogene FRAT1                                        | 0.000629 | 46.5338  |
| ACVRL1    | 94    | activin A receptor, type II-like kinase 1                   | 0.000662 | 46.36049 |
| 156DAG    | 1605  | dystrophin-associated glycoprotein-1                        | 0.000671 | 46.18718 |
| MAF       | 4094  | Avian musculoaponeurotic fibrosarcoma (MAF)                 | 0.000673 | 46.01386 |
| 2-Oct     | 5452  | POU domain, class 2, transcription factor 2                 | 0.000679 | 45.84055 |
| GH        | 2688  | pituitary growth hormone                                    | 0.000734 | 45.66724 |
| ACTA      | 58    | alpha skeletal muscle actin                                 | 0.000747 | 45.49393 |
| CMD2A     | 7137  | troponin I type 3 (cardiac)                                 | 0.000751 | 45.23397 |
| ACTC      | 70    | cardiac muscle alpha actin 1                                | 0.000751 | 45.23397 |
| CMD1G     | 7273  | titin                                                       | 0.000756 | 44.974   |
| TSG10     | 7251  | tumor susceptibility gene 101                               | 0.000767 | 44.80069 |
| CD49e     | 3678  | integrin, alpha 5 (fibronectin receptor, alpha polypeptide) | 0.000773 | 44.62738 |
| ITSN      | 6453  | intersectin short variant 12                                | 0.000797 | 44.45407 |
| LUN       | 10210 | OTTHUMP00000045227                                          | 0.000801 | 44.28076 |
| C-Rel     | 5966  | v-rel reticuloendotheliosis viral oncogene homolog          | 0.000827 | 44.10745 |
| DMP1      | 9988  | cyclin D binding myb-like transcription factor 1            | 0.000831 | 43.93414 |
| CDHS      | 5077  | Waardenburg syndrome 1                                      | 0.00084  | 43.76083 |
| AMY-1     | 26292 | associate of myc-1                                          | 0.000866 | 43.58752 |
| CDCA7L    | 55536 | transcription factor RAM2                                   | 0.000871 | 43.32756 |

|           |        |                                                            |          |          |
|-----------|--------|------------------------------------------------------------|----------|----------|
| CDK8      | 1024   | CDK8 protein kinase                                        | 0.000871 | 43.32756 |
| CD63      | 967    | CD63 antigen (melanoma 1 antigen)                          | 0.000879 | 43.06759 |
| DKFZp781F | 5325   | PLAG-like 1                                                | 0.000881 | 42.89428 |
| B2T       | 3918   | laminin, gamma 2 (nicein (100kD), kalinin (105kD))         | 0.000905 | 42.72097 |
| CNBP      | 7555   | zinc finger protein 9 (a cellular retroviral nucleic acid) | 0.00091  | 42.54766 |
| G13       | 10672  | guanine nucleotide binding protein (G protein), alpha 13   | 0.000931 | 42.37435 |
| CD18      | 3689   | complement receptor C3 beta-subunit                        | 0.000933 | 42.02773 |
| FGA       | 2243   | fibrinogen, alpha polypeptide                              | 0.000933 | 42.02773 |
| CD11C     | 3687   | myeloid membrane antigen, alpha subunit                    | 0.000933 | 42.02773 |
| DKFZp686L | 7342   | upstream binding protein 1 (LBP-1a)                        | 0.000949 | 41.68111 |
| BSF3      | 23529  | B-cell stimulating factor 3                                | 0.000963 | 41.5078  |
| TLR7      | 51284  | toll-like receptor 7                                       | 0.000967 | 41.33449 |
| Hs.89862  | 8717   | tumor necrosis factor receptor type 1 associated death     | 0.000979 | 41.16118 |
| KIAA1907  | 3911   | laminin alpha-5 chain                                      | 0.000982 | 40.98787 |
| ARFGEP10C | 9922   | IQ motif and Sec7 domain 1                                 | 0.001017 | 40.81456 |
| AOF2      | 23028  | lysine (K)-specific demethylase 1                          | 0.001019 | 40.64125 |
| ALK       | 238    | anaplastic lymphoma kinase Ki-1                            | 0.001046 | 40.46794 |
| FLJ94114  | 3952   | obesity factor                                             | 0.001048 | 40.29463 |
| AMPK      | 5563   | AMP-activated protein kinase alpha 2 catalytic subunit     | 0.001057 | 40.03466 |
| AMPK      | 5562   | AMPK alpha 1                                               | 0.001057 | 40.03466 |
| CD51      | 3685   | integrin alpha-V                                           | 0.001068 | 39.7747  |
| SNAPAP    | 23557  | SNARE associated protein snapin                            | 0.001089 | 39.51473 |
| DKFZp434k | 7442   | transient receptor potential vanilloid 1b                  | 0.001089 | 39.51473 |
| CBBM      | 5956   | opsin 1 (cone pigments), long-wave-sensitive (protan)      | 0.001101 | 39.25477 |
| KIAA0988  | 6904   | tubulin-specific chaperone d                               | 0.001102 | 39.08146 |
| IRF5      | 3663   | interferon regulatory factor 5                             | 0.001118 | 38.90815 |
| DELTA1    | 28514  | delta-like 1                                               | 0.001135 | 38.73484 |
| EDF       | 3624   | inhibin, beta A (activin A, activin AB alpha polypeptide)  | 0.001136 | 38.47487 |
| BMP-11    | 10220  | growth differentiation factor 11                           | 0.001136 | 38.47487 |
| ACTN2     | 88     | F-actin cross-linking protein                              | 0.001192 | 38.2149  |
| ACC-4     | 1512   | cathepsin H                                                | 0.001203 | 38.04159 |
| CCL11     | 6356   | small inducible cytokine A11                               | 0.001209 | 37.86828 |
| CC-CKR-2  | 1231   | monocyte chemoattractant protein 1 receptor                | 0.001221 | 37.69497 |
| CCL24     | 6369   | eotaxin-2                                                  | 0.001237 | 37.52166 |
| CADASIL   | 4854   | Notch homolog 3 (Drosophila)                               | 0.001267 | 37.34835 |
| ACTRI     | 90     | activin A receptor, type II-like kinase 2                  | 0.001279 | 37.17504 |
| GDF8      | 2660   | myostatin                                                  | 0.00129  | 37.00173 |
| DIF       | 7124   | TNF, monocyte-derived                                      | 0.001307 | 36.82842 |
| ACVR1C    | 130399 | activin receptor-like kinase 7                             | 0.001325 | 36.65511 |
| DDX9      | 1660   | DEAD/H box-9 (nuclear DNA helicase II; RNA helicase A)     | 0.001328 | 36.4818  |
| CFND      | 1947   | ephrin-B1                                                  | 0.001354 | 36.30849 |
| ALPS1A    | 355    | Fas (TNF receptor superfamily, member 6)                   | 0.001371 | 36.13518 |
| DKFZp313F | 5791   | protein tyrosine phosphatase epsilon                       | 0.001399 | 35.96187 |
| CD44      | 960    | chondroitin sulfate proteoglycan 8                         | 0.001405 | 35.78856 |
| BMP2      | 650    | bone morphogenetic protein 2                               | 0.001453 | 35.61525 |
| H2A.z     | 3015   | H2AZ histone                                               | 0.001463 | 35.44194 |
| ABRI      | 9445   | BRICHOS domain containing 2B                               | 0.001497 | 35.26863 |

|           |        |                                                              |          |          |
|-----------|--------|--------------------------------------------------------------|----------|----------|
| CTSS      | 1520   | cathepsin S                                                  | 0.001528 | 35.09532 |
| CCNB      | 891    | G2/mitotic-specific cyclin B1                                | 0.001554 | 34.92201 |
| DAPK3     | 1613   | ZIP kinase isoform                                           | 0.001557 | 34.7487  |
| ECP54     | 8607   | RuvB (E coli homolog)-like 1                                 | 0.001594 | 34.57539 |
| MGC21659  | 7069   | spot 14 protein                                              | 0.001618 | 34.40208 |
| AIM       | 1786   | DNA (cytosine-5-)-methyltransferase 1                        | 0.001627 | 34.22877 |
| MST155    | 51429  | SH3 and PX domain-containing protein SH3PX1                  | 0.001647 | 34.05546 |
| MAD7      | 6945   | transcription factor-like 4                                  | 0.001651 | 33.88215 |
| ACPA      | 5657   | proteinase 3 (serine proteinase, neutrophil)                 | 0.001654 | 33.70884 |
| DNMT3A    | 1788   | DNA (cytosine-5-)-methyltransferase 3 alpha                  | 0.001686 | 33.53553 |
| MBP       | 4155   | myelin basic protein                                         | 0.001738 | 33.36222 |
| ADAM33    | 80332  | a disintegrin and metalloprotease 33                         | 0.001744 | 33.18891 |
| IB1       | 9479   | mitogen-activated protein kinase 8 interacting protein 1     | 0.001755 | 33.0156  |
| ASEF2     | 221178 | adenomatous polyposis coli stimulated exchange factor 2      | 0.001796 | 32.84229 |
| ACTB      | 60     | PS1TP5-binding protein 1                                     | 0.001811 | 32.66898 |
| CLASPIN   | 63967  | claspin                                                      | 0.001812 | 32.32236 |
| BETA-TRCP | 8945   | beta-TrCP1                                                   | 0.001812 | 32.32236 |
| ARHGEF4   | 50649  | Rho guanine nucleotide exchange factor 4                     | 0.001812 | 32.32236 |
| CXCL12    | 6387   | chemokine (C-X-C motif) ligand 12 (stromal cell-derived)     | 0.001845 | 31.97574 |
| EMC19     | 6500   | transcription elongation factor B (SIII), polypeptide 1-like | 0.001851 | 31.80243 |
| PI5       | 5268   | serpin peptidase inhibitor, clade B (ovalbumin), member 5    | 0.001882 | 31.62912 |
| ADAP1     | 11033  | centaurin-alpha                                              | 0.001944 | 31.45581 |
| AFP       | 174    | alpha-1-fetoprotein                                          | 0.001965 | 31.2825  |
| ICK       | 22858  | MAK-related kinase                                           | 0.001969 | 31.10919 |
| CCL7      | 6354   | chemokine (C-C motif) ligand 7                               | 0.002011 | 30.93588 |
| CCL3      | 6348   | small inducible cytokine A3 (homologous to mouse Mip-1a)     | 0.002096 | 30.5026  |
| 464.2     | 6349   | small inducible cytokine A3-like 1                           | 0.002096 | 30.5026  |
| 464.2     | 414062 | small inducible cytokine A3-like 1                           | 0.002096 | 30.5026  |
| CCL2      | 6347   | small inducible cytokine A2                                  | 0.002096 | 30.5026  |
| APRIL     | 8741   | tumor necrosis factor-related death ligand-1                 | 0.002114 | 30.06932 |
| CAPRIN1   | 4076   | membrane component chromosome 11 surface marker 1            | 0.002129 | 29.89601 |
| ACT       | 72     | alpha-actin 3                                                | 0.002136 | 29.63605 |
| AAT6      | 59     | actin, alpha 2, smooth muscle, aorta                         | 0.002136 | 29.63605 |
| BMP2B     | 652    | bone morphogenetic protein 4                                 | 0.002192 | 29.37608 |
| ABI-1     | 10006  | nap1 binding protein                                         | 0.002193 | 29.20277 |
| NR2C2     | 7182   | nuclear receptor subfamily 2, group C, member 2              | 0.002236 | 29.02946 |
| AGER      | 177    | advanced glycosylation end product-specific receptor         | 0.002292 | 28.85615 |
| EHK3      | 2045   | Eph homology kinase-3                                        | 0.002313 | 28.68284 |
| ARH       | 26119  | LDL receptor adaptor protein                                 | 0.002327 | 28.50953 |
| FLJ22252  | 64321  | SRY (sex determining region Y)-box 17                        | 0.002345 | 28.33622 |
| AR-JP     | 5071   | parkin                                                       | 0.002378 | 28.16291 |
| COL1A1    | 1277   | alpha 1 type I collagen                                      | 0.002445 | 27.9896  |
| APOA1     | 335    | apolipoprotein A1                                            | 0.00247  | 27.81629 |
| DKFZp762F | 55662  | hypoxia-inducible factor 1, alpha subunit inhibitor          | 0.002484 | 27.64298 |
| EFNB2     | 1948   | ephrin B2                                                    | 0.002486 | 27.46967 |
| FLOT1     | 10211  | flotillin 1                                                  | 0.002615 | 27.29636 |
| CD2AP     | 23607  | CD2-associated protein                                       | 0.002658 | 27.12305 |

|           |                                                                        |          |          |
|-----------|------------------------------------------------------------------------|----------|----------|
| H1        | 6013 prorelaxin                                                        | 0.00266  | 26.94974 |
| B2-1      | 9267 homolog of secretory protein SEC7                                 | 0.002666 | 26.77643 |
| BGP       | 634 biliary glycoprotein adhesion molecule                             | 0.00274  | 26.60312 |
| RNF81     | 6737 Sjogren syndrome antigen A1 (52kDa, ribonucleoprotein)            | 0.002743 | 26.42981 |
| CD344     | 8322 WNT receptor frizzled-4                                           | 0.002922 | 26.2565  |
| MGC5329   | 5204 prefoldin subunit 5                                               | 0.002923 | 26.08319 |
| ATX1      | 6310 ataxin 1                                                          | 0.002948 | 25.90988 |
| ELF5      | 2001 epithelium-specific Ets transcription factor 2                    | 0.002986 | 25.73657 |
| C7orf16   | 10842 G-substrate                                                      | 0.003075 | 25.56326 |
| HOP       | 10963 stress-induced-phosphoprotein 1 (Hsp70/Hsp90-organizing)         | 0.0031   | 25.38995 |
| DKFZp686J | 57496 myocardin-related transcription factor B                         | 0.003136 | 25.21664 |
| CAP       | 10580 sorbin and SH3 domain containing 1                               | 0.003198 | 25.04333 |
| COL4A3    | 1285 alpha 3 type IV collagen                                          | 0.003207 | 24.87002 |
| BSAC      | 57591 megakaryocytic acute leukemia                                    | 0.003223 | 24.69671 |
| GHRF      | 2691 somatocrinin                                                      | 0.003389 | 24.5234  |
| AGS1      | 51655 dexamethasone-induced ras-related protein 1                      | 0.003553 | 24.35009 |
| CLEVER-1  | 23166 common lymphatic endothelial and vascular endothelial            | 0.003555 | 24.09012 |
| ON        | 6678 secreted protein, acidic, cysteine-rich                           | 0.003555 | 24.09012 |
| IHPS1     | 4842 neuronal nitric oxide synthase                                    | 0.003574 | 23.7435  |
| SSTR5     | 6755 somatostatin receptor subtype 5                                   | 0.003574 | 23.7435  |
| MGC13823  | 4838 nodal, mouse, homolog                                             | 0.003729 | 23.48354 |
| DKFZp586E | 9477 Trf (TATA binding protein-related factor)-proximal homolog (Droso | 0.00384  | 23.31023 |
| KDP       | 65125 serine/threonine-protein kinase WNK1                             | 0.003917 | 23.13692 |
| LGMD1     | 9499 limb-girdle muscular dystrophy 1A (autosomal dominant)            | 0.004037 | 22.9636  |
| PFM2      | 11107 PR domain containing 5                                           | 0.004052 | 22.79029 |
| APT1LG1   | 356 tumor necrosis factor (ligand) superfamily, member 6               | 0.004175 | 22.61698 |
| CCT-alpha | 6950 T-complex protein 1, alpha subunit                                | 0.004197 | 22.44367 |
| ACAN      | 176 large aggregating proteoglycan                                     | 0.004198 | 22.27036 |
| DLL4      | 54567 notch ligand DLL4                                                | 0.004266 | 22.09705 |
| FLJ23903  | 4641 nuclear myosin I                                                  | 0.004269 | 21.92374 |
| GSC       | 145258 goosecoid                                                       | 0.004346 | 21.75043 |
| C15       | 51316 placenta-specific 8                                              | 0.004452 | 21.57712 |
| A-FABP    | 2167 fatty acid binding protein 4, adipocyte                           | 0.004471 | 21.40381 |
| HsMAD1    | 8379 tumor protein p53 inducible protein 9                             | 0.004734 | 21.2305  |
| IB2       | 23542 mitogen-activated protein kinase 8 interacting protein 2         | 0.004736 | 21.05719 |
| FCER1G    | 2207 Fc fragment of IgE, high affinity I, receptor                     | 0.00476  | 20.88388 |
| ALPS2     | 843 caspase 10                                                         | 0.00478  | 20.71057 |
| BMP7      | 655 osteogenic protein 1                                               | 0.005046 | 20.53726 |
| HOX7      | 4487 msh homeobox 1                                                    | 0.005049 | 20.36395 |
| FLJ20922  | 5900 ral guanine nucleotide dissociation stimulator                    | 0.005162 | 20.19064 |
| CLPS      | 1208 pancreatic colipase preproprotein                                 | 0.005333 | 20.01733 |
| BAZ1B     | 9031 Williams-Beuren syndrome chromosome region 10                     | 0.005344 | 19.84402 |
| APBA1     | 320 amyloid beta A4 precursor protein-binding, family A                | 0.005354 | 19.67071 |
| KIAA1303  | 57521 regulatory associated protein of mTOR                            | 0.005428 | 19.4974  |
| FH        | 3949 low density lipoprotein receptor                                  | 0.005549 | 19.32409 |
| AMPH      | 273 Stiff-Man syndrome with breast cancer 128kDa autoantigen           | 0.00572  | 19.15078 |
| CSCD      | 1634 small leucine-rich protein 1B                                     | 0.005771 | 18.97747 |

|           |        |                                                             |          |          |
|-----------|--------|-------------------------------------------------------------|----------|----------|
| FLJ21396  | 23132  | RAD54-like 2                                                | 0.005876 | 18.80416 |
| 87U6      | 2773   | guanine nucleotide binding protein (G protein)              | 0.005918 | 18.54419 |
| GNAI1     | 2770   | Gi1 protein alpha subunit                                   | 0.005918 | 18.54419 |
| DKFZp686J | 4763   | neurofibromin                                               | 0.006012 | 18.28423 |
| ERRL1     | 133522 | peroxisome proliferator-activated receptor gamma            | 0.006018 | 18.11092 |
| DKFZp779N | 5340   | plasminogen                                                 | 0.006244 | 17.93761 |
| CNR2      | 56142  | KIAA0345-like 8                                             | 0.006278 | 17.7643  |
| CNR1      | 56144  | ortholog of mouse CNR1                                      | 0.006313 | 17.59099 |
| CD350     | 11211  | frizzled 10                                                 | 0.006334 | 17.41768 |
| CMT2A     | 9927   | mitofusin-2                                                 | 0.006396 | 17.24437 |
| FLJ93058  | 4688   | neutrophil cytosolic factor 2 (65kD, chronic granulomatous) | 0.006525 | 17.07106 |
| HSP70-1   | 3303   | heat shock-induced protein                                  | 0.00674  | 16.81109 |
| HSP70-1B  | 3304   | heat shock 70kD protein 1B                                  | 0.00674  | 16.81109 |
| COE3      | 253738 | early B-cell factor 3                                       | 0.006794 | 16.55113 |
| 14-3-3    | 10971  | 14-3-3 protein T-cell                                       | 0.006857 | 16.37782 |
| HRMT1L3   | 10196  | protein arginine methyltransferase 3                        | 0.006923 | 16.20451 |
| ELF3      | 1999   | E74-like factor 3 (ets domain transcription factor)         | 0.006941 | 15.77123 |
| EST01027  | 10628  | thioredoxin interacting protein                             | 0.006941 | 15.77123 |
| ERF       | 2077   | Ets2 repressor factor                                       | 0.006941 | 15.77123 |
| HHO.C10   | 3215   | homeo box B5                                                | 0.006941 | 15.77123 |
| CASP14    | 23581  | caspase 14                                                  | 0.007346 | 15.33795 |
| CC10      | 7356   | Uteroglobulin (Clara-cell specific 10-kD protein)           | 0.00756  | 15.16464 |
| CRFR2     | 1395   | corticotropin releasing hormone receptor 2                  | 0.00815  | 14.90468 |
| CRF-R     | 1394   | seven transmembrane helix receptor                          | 0.00815  | 14.90468 |
| BMP6      | 654    | bone morphogenetic protein 6                                | 0.008197 | 14.64471 |
| NKD2      | 85409  | Dvl-binding protein NKD2                                    | 0.008331 | 14.4714  |
| OPMD      | 8106   | poly(A) binding protein, nuclear 1                          | 0.008797 | 14.29809 |
| BM600-12  | 3914   | laminin B1k chain                                           | 0.009055 | 14.12478 |
| DKFZp564E | 5861   | RAB1, member RAS oncogene family                            | 0.009073 | 13.95147 |
| ASD3      | 4624   | myosin heavy chain, cardiac muscle alpha isoform            | 0.009091 | 13.77816 |
| E14       | 4863   | nuclear protein, ataxia-telangiectasia locus                | 0.010133 | 13.60485 |
| FLJ23079  | 6616   | synaptosomal-associated protein 25                          | 0.010299 | 13.43154 |
| FLJ11460  | 6844   | synaptobrevin 2                                             | 0.010355 | 13.25823 |
| CAPB      | 832    | capping protein (actin filament) muscle Z-line, beta        | 0.011159 | 13.08492 |
| LSP1      | 4046   | F-actin binding and cytoskeleton associated protein         | 0.011209 | 12.91161 |
| MGC16699  | 5797   | protein tyrosine phosphatase, receptor type                 | 0.011433 | 12.65165 |
| CD113     | 25945  | poliovirus receptor-related 3                               | 0.011433 | 12.65165 |
| DKFZp686C | 4703   | nebulin                                                     | 0.011442 | 12.39168 |
| HGS       | 9146   | hepatocyte growth factor-regulated tyrosine kinase          | 0.011562 | 12.21837 |
| CACH2     | 775    | voltage-gated calcium channel alpha subunit Cav1.2          | 0.011945 | 12.04506 |
| CLTA      | 1211   | clathrin, light chain (Lca)                                 | 0.012094 | 11.7851  |
| CLTB      | 1212   | clathrin, light polypeptide                                 | 0.012094 | 11.7851  |
| CAB1      | 782    | dihydropyridine-sensitive L-type, calcium channel beta-1    | 0.012667 | 11.52513 |
| HMOX2     | 3163   | heme oxygenase (decycling) 2                                | 0.012731 | 11.26516 |
| CACNB2    | 783    | calcium channel, voltage-dependent, beta 2 subunit          | 0.012731 | 11.26516 |
| BMP14     | 8200   | cartilage-derived morphogenetic protein-1                   | 0.013325 | 11.0052  |
| CFD       | 200576 | 1-phosphatidylinositol-4-phosphate 5-kinase                 | 0.013835 | 10.74523 |



|           |                                                                   |          |          |
|-----------|-------------------------------------------------------------------|----------|----------|
| HSF2      | 3298 heat shock transcription factor 2                            | 0.013835 | 10.74523 |
| AT3       | 4287 Machado-Joseph disease protein 1                             | 0.013974 | 10.48527 |
| CACNB3    | 784 calcium channel, voltage-dependent, beta 3 subunit            | 0.014161 | 10.31196 |
| CHRD      | 8646 chordin                                                      | 0.014237 | 10.13865 |
| CD213A1   | 3597 interleukin 13 receptor, alpha 1                             | 0.014717 | 9.965338 |
| HDLCQ12   | 3990 lipase C                                                     | 0.015226 | 9.792028 |
| BCD541    | 6606 survival of motor neuron 1, telomeric                        | 0.015544 | 9.445407 |
| FBP2      | 8570 KH-type splicing regulatory protein (FUSE binding protein 2) | 0.015544 | 9.445407 |
| BCD541    | 6607 survival of motor neuron 2, centromeric                      | 0.015544 | 9.445407 |
| FGG       | 2266 fibrinogen, gamma polypeptide                                | 0.015735 | 9.098787 |
| BP        | 3240 binding peptide                                              | 0.016233 | 8.925477 |
| SATB1     | 6304 special AT-rich sequence binding protein 1                   | 0.01658  | 8.752166 |
| Fug1      | 5905 Ran GTPase activating protein 1                              | 0.017234 | 8.578856 |
| MAFF      | 23764 transcription factor MAFF                                   | 0.018307 | 8.405546 |
| MGC:8389  | 9519 TBP-related factor 2                                         | 0.018393 | 8.232236 |
| ERK3      | 6300 stress-activated protein kinase 3                            | 0.01855  | 8.058925 |
| HPK38     | 9833 pEg3 kinase                                                  | 0.018968 | 7.885615 |
| ZABC1     | 7764 zinc finger protein 217                                      | 0.02033  | 7.712305 |
| MESP1     | 55897 mesoderm posterior 1 homolog (mouse)                        | 0.020681 | 7.45234  |
| 12CC4     | 27086 glutamine-rich factor 1                                     | 0.020681 | 7.45234  |
| MEL-18    | 7703 zinc finger protein 144                                      | 0.020939 | 7.192374 |
| ADAP      | 2533 FYN-binding protein (FYB-120/130)                            | 0.021077 | 7.019064 |
| FLJ27265  | 3150 high-mobility group (nonhistone chromosomal) protein 14      | 0.021171 | 6.845754 |
| ADRA2     | 150 alpha2A adrenergic receptor                                   | 0.021562 | 6.672444 |
| Bx42      | 22938 nuclear protein Skip                                        | 0.022197 | 6.499133 |
| ARNT2     | 9915 aryl-hydrocarbon receptor nuclear translocator 2             | 0.023026 | 6.325823 |
| ARHGAP7   | 10395 START domain containing protein 12                          | 0.023127 | 6.065858 |
| RAB10     | 10890 ras-related GTP-binding protein RAB10                       | 0.023127 | 6.065858 |
| ARHGAP26  | 23092 GTPase regulator associated with the focal adhesion kinase  | 0.023237 | 5.805893 |
| APOB      | 338 apolipoprotein B48                                            | 0.024973 | 5.632582 |
| ERBA-BETA | 7068 generalized resistance to thyroid hormone                    | 0.026373 | 5.372617 |
| AR7       | 7067 triiodothyronine receptor                                    | 0.026373 | 5.372617 |
| MSK       | 150094 myocardial SNF1-like kinase                                | 0.026568 | 5.112652 |
| CYT4      | 27128 cytohesin-4                                                 | 0.027428 | 4.939341 |
| FLJ33906  | 80317 zinc finger with KRAB and SCAN domains 3                    | 0.027481 | 4.766031 |
| ATX       | 5168 autotaxin                                                    | 0.027892 | 4.592721 |
| CMD1P     | 5350 phospholamban                                                | 0.029516 | 4.332756 |
| ATP2A2    | 488 sarcoplasmic/endoplasmic reticulum calcium ATPase 2           | 0.029516 | 4.332756 |
| CARD12    | 58484 caspase recruitment domain family, member 12                | 0.033923 | 4.07279  |
| INPP5D    | 3635 signaling inositol polyphosphate 5 phosphatase SIP-145       | 0.034119 | 3.89948  |
| CDP2      | 23316 cut-like 2                                                  | 0.034235 | 3.379549 |
| CSF2      | 1437 granulocyte-macrophage colony stimulating factor             | 0.034235 | 3.379549 |
| HACE1     | 57531 HECT domain and ankyrin repeat containing, E3 ubiquitin     | 0.034235 | 3.379549 |
| GASP      | 9737 G protein-coupled receptor-associated sorting protein        | 0.034235 | 3.379549 |
| IPOA4     | 3839 importin-alpha-Q2                                            | 0.034235 | 3.379549 |
| K17       | 3872 keratin 17                                                   | 0.03716  | 2.859619 |
| CAP-3     | 5272 protease inhibitor 9 (ovalbumin type)                        | 0.037266 | 2.686308 |

|            |       |                                                        |          |          |
|------------|-------|--------------------------------------------------------|----------|----------|
| CD301      | 10462 | macrophage C-type lectin                               | 0.038195 | 2.512998 |
| CCNE2      | 9134  | cyclin E2                                              | 0.038288 | 2.339688 |
| BS4        | 51667 | NY-REN-18 antigen                                      | 0.038288 | 2.166378 |
| FLJ12615   | 64398 | MAGUK p55 subfamily member 5                           | 0.038544 | 1.993068 |
| DMP-1      | 1758  | dentin matrix acidic phosphoprotein 1                  | 0.040576 | 1.819757 |
| GPR7       | 2831  | opioid-somatostatin-like receptor 7                    | 0.042203 | 1.559792 |
| GPR8       | 2832  | neuropeptides B/W receptor 2                           | 0.042203 | 1.559792 |
| N-syndecar | 9672  | syndecan proteoglycan 3                                | 0.044542 | 1.299827 |
| MZF-1      | 7593  | zinc finger protein 42                                 | 0.045195 | 1.126516 |
| DLG3       | 1741  | synapse-associated protein 102                         | 0.046249 | 0.953206 |
| BGR        | 64581 | C-type lectin                                          | 0.046873 | 0.779896 |
| CD266      | 51330 | type I transmembrane protein Fn14                      | 0.046897 | 0.606586 |
| HOX11L2    | 30012 | T-cell leukemia, homeobox 3                            | 0.047972 | 0.433276 |
| EB3        | 22924 | microtubule-associated protein, RP/EB family, member 3 | 0.048469 | 0.259965 |
| FLH2       | 5551  | lymphocyte pore forming protein                        | 0.049863 | 0.086655 |
