# Supplementary material for: “Topological Significance” Analysis of Gene Expression and Proteomic Profiles from Prostate Cancer Cells Reveals Key Mechanisms of Androgen Response
Source: PubMed Central journal article supplement (PMC2880599; doi:10.1371/journal.pone.0010936), 2010-06-03
Supplement: pone.0010936.s003.pdf [file pone.0010936.s003.pdf]

**List of maps and process networks enriched in up-regulated genes**

| Maps                                                               |          | Process networks                                     |         |
|--------------------------------------------------------------------|----------|------------------------------------------------------|---------|
| Unsaturated fatty acid biosynthesis                                | 5.56E-07 | Apoptosis_Endoplasmic reticulum stress pathway       | 0.00137 |
| Glycine, serine, cysteine and threonine metabolism/ Rodent version | 1.62E-05 | Signal transduction_Leptin signalig                  | 0.00215 |
| Glycine, serine, cysteine and threonine metabolism                 | 1.62E-05 | Signal transduction_CREM pathway                     | 0.00378 |
| Aminoacyl-tRNA biosynthesis in cytoplasm/Roden                     | 2.47E-05 | Signal transduction_Insulin signaling                | 0.00591 |
| Aminoacyl-tRNA biosynthesis in cytoplasm                           | 2.47E-05 | Proliferation_Positive regulation cell proliferation | 0.00855 |
| n-3 Polyunsaturated fatty acid biosynthesis                        | 4.07E-05 | Cytoskeleton_Intermediate filaments                  | 0.00875 |
| n-6 Polyunsaturated fatty acid biosynthesis                        | 4.07E-05 |                                                      |         |
| Urea cycle                                                         | 6.37E-05 |                                                      |         |
| Development_Growth hormone signaling via PI3K/AKT and              | 0.000472 |                                                      |         |
| Arachidonic acid production                                        | 0.00159  |                                                      |         |
| Proline metabolism                                                 | 0.0019   |                                                      |         |
| Transcription_Receptor-mediated HIF regulation                     | 0.002    |                                                      |         |

**List of maps and process networks enriched in up-regulated proteins**

| Maps                                                                  |          | Process networks                                        |          |
|-----------------------------------------------------------------------|----------|---------------------------------------------------------|----------|
| Aminoacyl-tRNA biosynthesis in cytoplasm/<br>Rodent version           | 4.51E-09 | Translation_Elongation-Termination                      | 2.61E-17 |
| Aminoacyl-tRNA biosynthesis in cytoplasm                              | 4.51E-09 | Translation_Translation initiation                      | 1.03E-10 |
| Phenylalanine metabolism/<br>Rodent version                           | 0.000122 | Signal transduction_Insulin signaling                   | 0.000344 |
| Phenylalanine metabolism                                              | 0.000122 | Response to hypoxia and                                 | 0.00501  |
| Regulation of lipid metabolism_Insulin                                | 0.000337 | Protein folding_Folding in normal condition             | 0.00613  |
| Regulation of lipid metabolism_Insulin regulation of fatty acid       | 0.000413 | Signal transduction_Androgen receptor nuclear signaling | 0.00737  |
| Glycine, serine, cysteine and threonine metabolism                    | 0.000441 |                                                         |          |
| Glycine, serine, cysteine and threonine                               | 0.0005   |                                                         |          |
| Apoptosis and survival_Anti-apoptotic action of nuclear ESR1 and      | 0.00317  |                                                         |          |
| Oxidative stress_Role of ASK1 under oxidative                         | 0.00206  |                                                         |          |
| Aspartate and asparagine metabolism                                   | 0.00206  |                                                         |          |
| Cell cycle_Role of 14-3-3 proteins in cell cycle regulation           | 0.00227  |                                                         |          |
| Development_Lipoxin inhibitory action on PDGF, EGF and LTD4 signaling | 0.0027   |                                                         |          |
| Inhibitory action of Lipoxin A4 on PDGF, EGF and LTD4 signaling       | 0.0027   |                                                         |          |
