# Supplementary material for: “Topological Significance” Analysis of Gene Expression and Proteomic Profiles from Prostate Cancer Cells Reveals Key Mechanisms of Androgen Response
Source: PubMed Central journal article supplement (PMC2880599; doi:10.1371/journal.pone.0010936), 2010-06-03
Supplement: pone.0010936.s004.pdf [file pone.0010936.s004.pdf]

**Enrichment of extended up-regulated genes**

|                                | Maps                                        |                                                   | Process networks                                |                                                        |
|--------------------------------|---------------------------------------------|---------------------------------------------------|-------------------------------------------------|--------------------------------------------------------|
|                                | Average # of significant maps (FDR of 0.05) | # of new and original significant maps recovered* | Average # of significant processes (FDR of 0.2) | # of new and original significant processes recovered* |
| Original set (no random added) | 12                                          | 0 and 12                                          | 6                                               | 0 and 6                                                |
| 50 random                      | 9.58                                        | 1 and 11                                          | 3.2                                             | 4 and 6                                                |
| 100 random                     | 9.7                                         | 0 and 11                                          | 3.1                                             | 4 and 6                                                |
| 200 random                     | 8.8                                         | 1 and 11                                          | 2.1                                             | 0 and 4                                                |
| 300 random                     | 8.8                                         | 0 and 8                                           | 1.4                                             | 0 and 3                                                |
| 400 random                     | 3.7                                         | 0 and 9                                           | 0.9                                             | 0 and 2                                                |
| 500 random                     | 2.3                                         | 0 and 7                                           | 0.9                                             | 0 and 1                                                |
| 1,000 random                   | 0.3                                         | 0 and 0                                           | 0.5                                             | 0 and 0                                                |

100 randomizations were performed for each size of random gene set

\*Only maps significant in at least 10% of randomizations were counted

**Enrichment of extended up-regulated proteins**

|                                | Maps                                        |                                                   | Process networks                                |                                                        |
|--------------------------------|---------------------------------------------|---------------------------------------------------|-------------------------------------------------|--------------------------------------------------------|
|                                | Average # of significant maps (FDR of 0.05) | # of new and original significant maps recovered* | Average # of significant processes (FDR of 0.2) | # of new and original significant processes recovered* |
| Original set (no random added) | 14                                          | 1 and 14                                          | 6                                               | 0 and 6                                                |
| 50 random                      | 7.28                                        | 0 and 8                                           | 4.9                                             | 1 and 6                                                |
| 100 random                     | 3.55                                        | 0 and 2                                           | 5.1                                             | 4 and 6                                                |
| 200 random                     | 3.2                                         | 0 and 2                                           | 3.4                                             | 0 and 6                                                |
| 300 random                     | 2.7                                         | 0 and 2                                           | 3.9                                             | 0 and 4                                                |
| 400 random                     | 2.7                                         | 0 and 2                                           | 3.5                                             | 0 and 3                                                |
| 500 random                     | 1.42                                        | 0 and 2                                           | 2.8                                             | 0 and 2                                                |
| 1,000 random                   | 0.26                                        | 0 and 0                                           | 2.3                                             | 0 and 2                                                |

100 randomizations were performed for each size of random gene set

\*Only maps significant in at least 10% of randomizations were counted
