# Supplementary material for: “Topological Significance” Analysis of Gene Expression and Proteomic Profiles from Prostate Cancer Cells Reveals Key Mechanisms of Androgen Response
Source: PubMed Central journal article supplement (PMC2880599; doi:10.1371/journal.pone.0010936), 2010-06-03
Supplement: pone.0010936.s005.pdf [file pone.0010936.s005.pdf]

**Topologically significant genes from truncated set of gene expression**

| <b>Symbol</b> | <b>Entrez_ID</b> | <b>Description</b>                                       | <b>p value</b> | <b>percentile</b> |
|---------------|------------------|----------------------------------------------------------|----------------|-------------------|
| PKC-MU        | 5587             | protein kinase D1                                        | 1.56E-10       | 99.8503           |
| CREB          | 1385             | cAMP responsive element binding protein 1                | 3.36E-10       | 99.77545          |
| ATF4          | 468              | activating transcription factor 4                        | 3.59E-09       | 99.62575          |
| PS6K          | 6198             | serine/threonine kinase 14 alpha                         | 3.95E-09       | 99.47605          |
| SREBF1        | 6720             | sterol regulatory element binding transcription factor 1 | 1.28E-08       | 99.32635          |
| HU-2          | 6196             | ribosomal protein S6 kinase alpha 2                      | 1.38E-08       | 99.17665          |
| CLS           | 6197             | ribosomal protein S6 kinase, 90kDa, polypeptide 3        | 1.44E-08       | 98.87725          |
| FHL3          | 2275             | LIM-only protein FHL3                                    | 1.44E-08       | 98.87725          |
| HU-1          | 6195             | dJ590P13.1 (ribosomal protein S6 kinase, 90kD)           | 1.44E-08       | 98.87725          |
| MYC           | 4609             | myc proto-oncogene protein                               | 1.49E-08       | 98.57784          |
| SGK           | 6446             | serum/glucocorticoid regulated kinase 1                  | 1.89E-08       | 98.42814          |
| DKFZp686N     | 2099             | estrogen receptor 1                                      | 4.08E-08       | 98.27844          |
| AP-1          | 3725             | v-jun avian sarcoma virus 17 oncogene homolog            | 4.89E-08       | 98.12874          |
| IMB1          | 3837             | importin beta-1 subunit                                  | 6.07E-08       | 97.97904          |
| AGMX1         | 695              | dominant-negative kinase-deficient Brutons               | 6.92E-08       | 97.82934          |
| DPC4          | 4089             | mothers against decapentaplegic homolog 4                | 1.22E-07       | 97.67964          |
| 1-May         | 5580             | protein kinase C, delta                                  | 1.26E-07       | 97.52994          |
| ACT           | 71               | actin-like protein                                       | 1.35E-07       | 97.30539          |
| ACTB          | 60               | PS1TP5-binding protein 1                                 | 1.35E-07       | 97.30539          |
| DKFZp686C     | 4790             | nuclear factor kappa-B, subunit 1                        | 1.8E-07        | 97.08084          |
| HSPG          | 6383             | heparan sulfate proteoglycan core protein                | 2.46E-07       | 96.93114          |
| GFRP1         | 3164             | hormone receptor                                         | 2.67E-07       | 96.78144          |
| APRF          | 6774             | DNA-binding protein APRF                                 | 2.83E-07       | 96.63174          |
| GSK3B         | 2932             | glycogen synthase kinase 3 beta                          | 3.13E-07       | 96.48204          |
| AMCBX1        | 8517             | incontinentia pigmenti                                   | 3.21E-07       | 96.33234          |
| CSEN          | 30818            | calsenilin, presenilin-binding protein                   | 3.35E-07       | 96.18263          |
| FLJ23903      | 4641             | nuclear myosin I                                         | 4.21E-07       | 96.03293          |
| MGC13177      | 5970             | v-rel avian reticuloendotheliosis viral oncogene         | 4.32E-07       | 95.88323          |
| AMPK          | 5563             | AMP-activated protein kinase alpha 2 catalytic subunit   | 5.12E-07       | 95.65868          |
| AMPK          | 5562             | AMPK alpha 1                                             | 5.12E-07       | 95.65868          |
| HSF1          | 3297             | heat shock transcription factor 1                        | 5.17E-07       | 95.43413          |
| ASH           | 2885             | growth factor receptor-bound protein 3                   | 8.13E-07       | 95.28443          |
| CRTC1         | 23373            | transducer of regulated cAMP                             | 9.57E-07       | 95.13473          |
| DKFZp686F     | 3065             | histone deacetylase 1                                    | 1.12E-06       | 94.98503          |
| FLJ20408      | 3280             | transcription factor HES-1                               | 1.24E-06       | 94.83533          |
| Arc-1         | 999              | cell-CAM 120/80                                          | 1.28E-06       | 94.68563          |
| CF2R          | 2149             | thrombin receptor                                        | 1.32E-06       | 94.53593          |
| DKFZp586N     | 4088             | mad homolog JV15-2                                       | 1.52E-06       | 94.38623          |
| ARB1          | 408              | arrestin beta 1                                          | 1.56E-06       | 94.23653          |
| HGS           | 9146             | hepatocyte growth factor-regulated tyrosine              | 1.64E-06       | 94.08683          |
| G-ALPHA-q     | 2776             | guanine nucleotide binding protein (G protein)           | 1.91E-06       | 93.93713          |
| PC            | 5624             | protein C                                                | 1.97E-06       | 93.78743          |
| JNK           | 5599             | stress-activated protein kinase JNK1                     | 2.05E-06       | 93.63772          |
| MAPKAPK2      | 9261             | mitogen-activated protein                                | 2.13E-06       | 93.48802          |
| CDX-3         | 1045             | caudal type homeo box transcription factor 2             | 2.27E-06       | 93.33832          |

|           |                                                                    |          |          |
|-----------|--------------------------------------------------------------------|----------|----------|
| KIAA1047  | 9611 nuclear receptor co-repressor 1                               | 2.29E-06 | 93.18862 |
| IKBA      | 4792 nuclear factor of kappa light polypeptide gene enhancer in B- | 2.36E-06 | 93.03892 |
| AFBP      | 3484 amniotic fluid binding protein                                | 2.42E-06 | 92.88922 |
| BRCA1     | 672 breast and ovarian cancer susceptibility protein 1             | 2.45E-06 | 92.73952 |
| Jnk2      | 5609 dual specificity mitogen-activated protein kinase             | 2.5E-06  | 92.58982 |
| GNB2L1    | 10399 proliferation-inducing gene 21                               | 2.86E-06 | 92.44012 |
| MAP3K7    | 6885 transforming growth factor-beta-activated kinase 1            | 2.97E-06 | 92.29042 |
| KRML      | 9935 transcription factor MAFB                                     | 3.23E-06 | 92.14072 |
| DKFZp434k | 7442 transient receptor potential vanilloid 1b                     | 3.44E-06 | 91.99102 |
| KIAA0988  | 6904 tubulin-specific chaperone d                                  | 3.5E-06  | 91.84132 |
| AIS       | 8626 tumor protein p63                                             | 3.6E-06  | 91.69162 |
| ACH       | 2261 fibroblast growth factor receptor 3                           | 3.8E-06  | 91.54192 |
| EAP1      | 9232 ESP1-associated protein 1                                     | 4.04E-06 | 91.39222 |
| BID       | 637 BID isoform Si6                                                | 4.07E-06 | 91.24251 |
| BFGF      | 2247 prostatropin                                                  | 4.15E-06 | 91.09281 |
| NFE2L2    | 4780 nuclear factor (erythroid-derived 2)-like 2                   | 4.31E-06 | 90.94311 |
| MGC15877  | 5499 serine/threonine protein phosphatase PP1-alpha 1              | 4.41E-06 | 90.64371 |
| PPP1CC    | 5501 protein phosphatase 1, catalytic subunit                      | 4.41E-06 | 90.64371 |
| MGC3672   | 5500 protein phosphatase 1, catalytic subunit                      | 4.41E-06 | 90.64371 |
| DKFZp781l | 4914 neurotrophic tyrosine kinase, receptor, type 1                | 4.52E-06 | 90.34431 |
| DKFZp686l | 5327 alteplase                                                     | 4.65E-06 | 90.19461 |
| DELTA     | 7528 YY1 transcription factor                                      | 5.31E-06 | 90.04491 |
| CK2B      | 1460 casein kinase 2, beta polypeptide                             | 5.36E-06 | 89.89521 |
| C2TA      | 4261 class II transactivator                                       | 5.39E-06 | 89.74551 |
| DTR       | 1839 heparin-binding epidermal growth factor                       | 5.44E-06 | 89.59581 |
| AIF4      | 83737 itchy homolog E3 ubiquitin protein ligase                    | 5.54E-06 | 89.44611 |
| CDC2      | 983 cell cycle controller CDC2                                     | 5.64E-06 | 89.29641 |
| IRF-1     | 3659 interferon regulatory factor-1                                | 5.79E-06 | 89.14671 |
| ARP1      | 7026 transcription factor COUP 2                                   | 7.08E-06 | 88.99701 |
| BEK       | 2263 FGF receptor                                                  | 7.18E-06 | 88.84731 |
| SNAPAP    | 23557 SNARE associated protein snapin                              | 7.46E-06 | 88.6976  |
| BCL2      | 596 B-cell CLL/lymphoma 2                                          | 7.75E-06 | 88.5479  |
| HEB       | 6938 transcription factor 12                                       | 8.04E-06 | 88.3982  |
| MKNK1     | 8569 MAP kinase interacting serine/threonine kinase 1              | 8.1E-06  | 88.2485  |
| GCCR      | 2908 glucocorticoid receptor                                       | 8.22E-06 | 88.0988  |
| CAMK2A    | 815 CaM kinase II alpha subunit                                    | 8.97E-06 | 87.9491  |
| CSBP1     | 1432 stress-activated protein kinase 2A                            | 9.12E-06 | 87.7994  |
| NR111     | 7421 vitamin D (1,25-dihydroxyvitamin D3) receptor                 | 9.19E-06 | 87.6497  |
| ACLS      | 2737 GLI-Kruppel family member GLI3                                | 9.82E-06 | 87.5     |
| D12S1644  | 6778 signal transducer and activator of transcription 6            | 9.95E-06 | 87.3503  |
| HSP75     | 10131 heat shock protein 75                                        | 1E-05    | 86.97605 |
| D6S182    | 3326 heat shock 90kDa protein 1, beta                              | 1E-05    | 86.97605 |
| ECGP      | 7184 heat shock protein 90kDa beta, member 1                       | 1E-05    | 86.97605 |
| FLJ31884  | 3320 heat shock protein 90kDa alpha (cytosolic)                    | 1E-05    | 86.97605 |
| MYF4      | 4656 myogenin                                                      | 1.08E-05 | 86.6018  |
| IB1       | 9479 mitogen-activated protein kinase 8                            | 1.12E-05 | 86.4521  |
| PIK3CD    | 5293 phosphatidylinositol 3-kinase                                 | 1.22E-05 | 86.15269 |

|             |       |                                                       |          |          |
|-------------|-------|-------------------------------------------------------|----------|----------|
| DKFzp779K   | 5291  | PI3-kinase p110 subunit beta                          | 1.22E-05 | 86.15269 |
| MGC14216    | 5290  | phosphatidylinositol 3-kinase, catalytic              | 1.22E-05 | 86.15269 |
| C-Rel       | 5966  | v-rel reticuloendotheliosis viral oncogene homolog    | 1.28E-05 | 85.85329 |
| HOX1        | 3202  | homeobox A5                                           | 1.31E-05 | 85.70359 |
| D2DR        | 1813  | seven transmembrane helix receptor                    | 1.32E-05 | 85.55389 |
| AAG11       | 2274  | aging-associated gene 11                              | 1.32E-05 | 85.40419 |
| A2MR        | 4035  | type V tgf-beta receptor                              | 1.36E-05 | 85.25449 |
| AP-2        | 7020  | transcription factor AP-2 alpha                       | 1.45E-05 | 85.10479 |
| BCL10       | 8915  | CARD-like apoptotic protein                           | 1.69E-05 | 84.95509 |
| BETA-TRCP   | 8945  | beta-TrCP1                                            | 1.8E-05  | 84.80539 |
| GCN5        | 2648  | GCN5 general control of amino-acid synthesis 5-like 2 | 1.99E-05 | 84.65569 |
| KOR         | 4986  | opioid receptor, kappa 1                              | 2.23E-05 | 84.50599 |
| AWD         | 4830  | NDP kinase A                                          | 2.35E-05 | 84.35629 |
| CAMK4       | 814   | CAM kinase IV                                         | 2.42E-05 | 84.20659 |
| CEBPZ       | 1649  | growth arrest- and DNA damage-inducible               | 2.44E-05 | 84.05689 |
| BAPX1       | 579   | bagpipe homeobox 1                                    | 2.69E-05 | 83.90719 |
| MGC:3310    | 7189  | TNF receptor-associated factor 6                      | 2.73E-05 | 83.75749 |
| EDNRA       | 1909  | endothelin receptor type A                            | 2.79E-05 | 83.60778 |
| MGC11154    | 5879  | migration-inducing gene 5                             | 2.83E-05 | 83.45808 |
| C/EBP-beta  | 1051  | transcription factor 5                                | 2.87E-05 | 83.30838 |
| PRKAR2      | 5577  | protein kinase, cAMP-dependent                        | 2.89E-05 | 83.15868 |
| ALPS2B      | 841   | cysteine protease                                     | 2.9E-05  | 83.00898 |
| JAK-3       | 3718  | Janus kinase 3                                        | 2.99E-05 | 82.85928 |
| DAP-150     | 1639  | p150-glued                                            | 3.1E-05  | 82.63473 |
| DDPAC       | 4137  | microtubule-associated protein tau, isoform 4         | 3.1E-05  | 82.63473 |
| HIF-1alpha  | 3091  | member of PAS superfamily 1                           | 3.53E-05 | 82.41018 |
| BSAP        | 5079  | B-cell lineage specific activator                     | 3.64E-05 | 82.26048 |
| CIG         | 2335  | fibronectin 1                                         | 3.82E-05 | 82.11078 |
| NR1C3       | 5468  | PPAR gamma                                            | 3.85E-05 | 81.96108 |
| HIRS-1      | 3667  | insulin receptor substrate 1                          | 3.87E-05 | 81.81138 |
| CP107       | 5933  | retinoblastoma-like 1 (p107)                          | 3.89E-05 | 81.66168 |
| DKFzp686E   | 6772  | signal transducer and activator of transcription-1    | 3.9E-05  | 81.51198 |
| GNA-11      | 2767  | guanine nucleotide-binding protein, Gq class, GNA11   | 3.97E-05 | 81.36228 |
| IB2         | 23542 | mitogen-activated protein kinase 8                    | 4.04E-05 | 81.21257 |
| INrf2       | 9817  | kelch-like ECH-associated protein 1                   | 4.06E-05 | 81.06287 |
| MGC10283    | 5566  | protein kinase A catalytic subunit                    | 4.13E-05 | 80.91317 |
| C/EBP-alpha | 1050  | CCAAT/enhancer binding protein alpha                  | 4.21E-05 | 80.76347 |
| ABP-280     | 2316  | filamin A, alpha                                      | 4.21E-05 | 80.61377 |
| BLIMP1      | 639   | beta-interferon gene positive-regulatory domain I     | 4.26E-05 | 80.46407 |
| FKH1        | 2308  | forkhead homolog in rhabdomyosarcoma                  | 4.28E-05 | 80.31437 |
| CAK1        | 1022  | serine/threonine protein kinase MO15                  | 4.31E-05 | 80.16467 |
| ACUG        | 64127 | caspase recruitment domain protein 15                 | 4.39E-05 | 80.01497 |
| CSK         | 1445  | c-src tyrosine kinase                                 | 4.49E-05 | 79.86527 |
| MAPK13      | 5603  | mitogen-activated protein kinase p38 delta            | 4.54E-05 | 79.71557 |
| CD217       | 23765 | interleukin 17 receptor A                             | 4.55E-05 | 79.49102 |
| FLJ95963    | 84818 | interleukin 17 receptor-like                          | 4.55E-05 | 79.49102 |
| G13         | 10672 | guanine nucleotide binding protein (G protein)        | 4.73E-05 | 79.19162 |

|           |       |                                                           |          |          |
|-----------|-------|-----------------------------------------------------------|----------|----------|
| GNA12     | 2768  | guanine nucleotide binding protein (G protein)            | 4.73E-05 | 79.19162 |
| CAM2      | 816   | proline rich calmodulin-dependent protein kinase          | 5.03E-05 | 78.81737 |
| CAMK      | 818   | calcium/calmodulin-dependent protein kinase               | 5.03E-05 | 78.81737 |
| CAMK2D    | 817   | calcium/calmodulin-dependent protein kinase II delta      | 5.03E-05 | 78.81737 |
| SFN       | 2810  | stratifin                                                 | 5.06E-05 | 78.51796 |
| GNB1      | 2782  | transducin beta chain 1                                   | 5.46E-05 | 78.21856 |
| GNG1      | 2792  | guanine nucleotide binding protein (G protein)            | 5.46E-05 | 78.21856 |
| ADRBK1    | 156   | beta adrenergic receptor kinase 1                         | 5.46E-05 | 78.21856 |
| CD309     | 3791  | vascular endothelial growth factor receptor 2             | 5.62E-05 | 77.91916 |
| C2orf31   | 7855  | seven-transmembrane receptor frizzled-5                   | 5.7E-05  | 77.76946 |
| AIM       | 1786  | DNA (cytosine-5-)-methyltransferase 1                     | 5.71E-05 | 77.61976 |
| DKFZp781F | 9451  | eukaryotic translation initiation factor 2-alpha kinase 3 | 5.72E-05 | 77.47006 |
| CD44      | 960   | chondroitin sulfate proteoglycan 8                        | 5.95E-05 | 77.32036 |
| PI5       | 5268  | serpin peptidase inhibitor, clade B (ovalbumin)           | 5.99E-05 | 77.17066 |
| AHR       | 196   | aromatic hydrocarbon receptor                             | 6.01E-05 | 77.02096 |
| PPP1R7    | 5510  | protein phosphatase-1 regulatory subunit 7 beta1          | 6.05E-05 | 76.87126 |
| FYN       | 2534  | src-like kinase                                           | 6.06E-05 | 76.72156 |
| CAP20     | 1026  | CDK-interaction protein 1                                 | 6.17E-05 | 76.57186 |
| CK2A1     | 1457  | casein kinase II alpha subunit                            | 7.01E-05 | 76.34731 |
| CK2A2     | 1459  | casein kinase 2, alpha prime polypeptide                  | 7.01E-05 | 76.34731 |
| DKFZp781F | 5325  | PLAG-like 1                                               | 7.08E-05 | 76.12275 |
| CANP      | 823   | calpain 1, large subunit                                  | 7.14E-05 | 75.97305 |
| GRIN2B    | 2904  | glutamate receptor subunit epsilon-2                      | 7.28E-05 | 75.82335 |
| POMP100   | 6421  | polypyrimidine tract-binding protein-associated           | 7.34E-05 | 75.67365 |
| ARH12     | 387   | oncogene RHO H12                                          | 7.45E-05 | 75.52395 |
| IRF4      | 3662  | interferon regulatory factor 4                            | 7.47E-05 | 75.2994  |
| DAPK3     | 1613  | ZIP kinase isoform                                        | 7.47E-05 | 75.2994  |
| EDF       | 3624  | inhibin, beta A (activin A, activin AB alpha polypeptide) | 7.75E-05 | 74.92515 |
| BMP-11    | 10220 | growth differentiation factor 11                          | 7.75E-05 | 74.92515 |
| ACTRIIB   | 93    | activin A type IIB receptor                               | 7.75E-05 | 74.92515 |
| CAR       | 846   | extracellular calcium-sensing receptor                    | 7.83E-05 | 74.4012  |
| RAMP1     | 10267 | calcitonin receptor-like receptor activity                | 7.83E-05 | 74.4012  |
| RAMP3     | 10268 | receptor activity modifying protein 3                     | 7.83E-05 | 74.4012  |
| RAMP2     | 10266 | receptor (calcitonin) activity modifying protein 2        | 7.83E-05 | 74.4012  |
| CBX4      | 8535  | chromobox homolog 4                                       | 7.92E-05 | 74.02695 |
| FLJ43106  | 7249  | tuberin                                                   | 7.93E-05 | 73.87725 |
| C20orf97  | 57761 | p65-interacting inhibitor of NF-kappaB                    | 8.17E-05 | 73.72754 |
| CD36      | 948   | scavenger receptor class B, member 3                      | 8.39E-05 | 73.57784 |
| MGC13185  | 7334  | ubiquitin carrier protein N                               | 8.42E-05 | 73.42814 |
| ESA1      | 10524 | cPLA2 interacting protein                                 | 8.62E-05 | 73.27844 |
| ASK1      | 4217  | MAPK/ERK kinase kinase 5                                  | 8.69E-05 | 73.12874 |
| CALR      | 811   | Sicca syndrome antigen A (autoantigen Ro; calreticulin)   | 8.78E-05 | 72.97904 |
| BAF190    | 6595  | SWI/SNF-related matrix-associated actin-dependent         | 8.79E-05 | 72.82934 |
| COLEC1    | 4153  | mannose-binding protein C                                 | 9.44E-05 | 72.67964 |
| HD3       | 8841  | histone deacetylase 3                                     | 9.6E-05  | 72.52994 |
| PLK       | 5347  | polo like kinase                                          | 9.63E-05 | 72.38024 |
| PRO1280   | 51684 | suppressor of fused homolog (Drosophila)                  | 9.71E-05 | 72.23054 |

|           |                                                             |          |          |
|-----------|-------------------------------------------------------------|----------|----------|
| CD124     | 3566 interleukin-4 receptor alpha chain                     | 0.000103 | 72.00599 |
| CD132     | 3561 common cytokine receptor gamma chain                   | 0.000103 | 72.00599 |
| CD56      | 4684 neural cell adhesion molecule, NCAM                    | 0.000103 | 71.78144 |
| BCL3      | 602 B-cell leukemia/lymphoma 3                              | 0.000103 | 71.63174 |
| DLG4      | 1742 synapse-associated protein 90                          | 0.000103 | 71.48204 |
| APOER2    | 7804 apolipoprotein E receptor 2                            | 0.000104 | 71.33234 |
| ARMD10    | 7099 homolog of Drosophila toll                             | 0.000104 | 71.18263 |
| ELK4      | 2005 SRF accessory protein 1                                | 0.000106 | 71.03293 |
| CRM1      | 7514 exportin 1 (CRM1, yeast, homolog)                      | 0.000108 | 70.88323 |
| BSF3      | 23529 B-cell stimulating factor 3                           | 0.00011  | 70.73353 |
| DARPP-32  | 84152 protein phosphatase 1, regulatory (inhibitor)         | 0.000111 | 70.58383 |
| EDN2      | 1907 endothelin 2                                           | 0.000114 | 70.35928 |
| EDN3      | 1908 truncated endothelin 3                                 | 0.000114 | 70.35928 |
| AT1       | 472 serine-protein kinase ATM                               | 0.000116 | 70.13473 |
| COUP-TFI  | 7025 transcription factor COUP 1                            | 0.00012  | 69.98503 |
| CRSP1     | 5469 vitamin D receptor-interacting protein complex         | 0.000121 | 69.83533 |
| BSF2      | 3569 interleukin 6                                          | 0.000121 | 69.68563 |
| 53BP1     | 7158 tumor protein 53-binding protein, 1                    | 0.000122 | 69.53593 |
| CHNG1     | 7253 thyroid stimulating hormone receptor                   | 0.000124 | 69.38623 |
| C1Q-C     | 714 complement component 1, q subcomponent, C chain         | 0.000132 | 69.08683 |
| C1QB      | 713 complement component 1, q subcomponent                  | 0.000132 | 69.08683 |
| C1QA      | 712 complement component C1q, A chain                       | 0.000132 | 69.08683 |
| ATOD4     | 9021 suppressor of cytokine signaling 3                     | 0.000133 | 68.78743 |
| FLJ25220  | 3679 integrin alpha 7                                       | 0.000134 | 68.56287 |
| CD29      | 3688 integrin beta 1                                        | 0.000134 | 68.56287 |
| FLJ26504  | 6464 SHC (Src homology 2 domain containing)                 | 0.000138 | 68.33832 |
| ADORA2    | 136 adenosine A2b receptor                                  | 0.00014  | 68.18862 |
| CD49e     | 3678 integrin, alpha 5 (fibronectin receptor)               | 0.000156 | 68.03892 |
| TREB5     | 7494 X-box binding protein 1                                | 0.000157 | 67.88922 |
| DIAPH3    | 81624 diaphanous homolog 3                                  | 0.00016  | 67.73952 |
| TSG10     | 7251 tumor susceptibility gene 101                          | 0.000163 | 67.58982 |
| FOG       | 161882 friend of GATA-1                                     | 0.000164 | 67.44012 |
| NRSF      | 5978 repressor binding to the X2 box                        | 0.000164 | 67.29042 |
| C2orf5    | 150684 MURR1                                                | 0.00018  | 67.14072 |
| MIZ-1     | 7709 zinc finger protein 151 (pHZ-67)                       | 0.000183 | 66.99102 |
| GIP       | 2771 guanine nucleotide binding protein (G protein)         | 0.000184 | 66.84132 |
| BTF2      | 2965 general transcription factor IIH, polypeptide 1, 62kDa | 0.000184 | 66.69162 |
| FLJ36302  | 7074 T-cell lymphoma invasion and metastasis 1              | 0.000187 | 66.54192 |
| MGC8367   | 5111 proliferating cell nuclear antigen                     | 0.000187 | 66.39222 |
| F-SRC-1   | 8648 nuclear receptor coactivator 1                         | 0.000193 | 66.24251 |
| GPRC1A    | 2911 glutamate receptor, metabotropic 1                     | 0.000199 | 66.09281 |
| CLG4B     | 4318 gelatinase B                                           | 0.0002   | 65.94311 |
| BCAR1     | 9564 Cas scaffolding protein family member 1                | 0.000201 | 65.79341 |
| DKFZp686C | 5148 rod cG-PDE G                                           | 0.000206 | 65.56886 |
| CSNBAD3   | 2779 transducin alpha-1 chain                               | 0.000206 | 65.56886 |
| ERN1      | 2081 endoplasmic reticulum to nucleus signaling 1           | 0.000206 | 65.34431 |
| CCR1      | 1230 chemokine (C-C motif) receptor 1                       | 0.000212 | 65.19461 |

|          |                                                              |          |          |
|----------|--------------------------------------------------------------|----------|----------|
| DELTA1   | 28514 delta-like 1                                           | 0.000212 | 65.04491 |
| GIG8     | 3398 cell growth-inhibiting gene 8                           | 0.000213 | 64.89521 |
| OPRD     | 4985 opioid receptor, delta 1                                | 0.00022  | 64.74551 |
| CRTC2    | 200186 transducer of regulated cAMP response                 | 0.000225 | 64.59581 |
| BCL5     | 604 zinc finger protein 51                                   | 0.000228 | 64.44611 |
| AOF2     | 23028 lysine (K)-specific demethylase 1                      | 0.00023  | 64.29641 |
| CAMK1    | 8536 calcium/calmodulin-dependent protein kinase I           | 0.000233 | 64.14671 |
| IBP5     | 3488 insulin-like growth factor binding protein 5            | 0.000235 | 63.99701 |
| CD130    | 3572 CD130 antigen                                           | 0.000238 | 63.84731 |
| ACVR1C   | 130399 activin receptor-like kinase 7                        | 0.00024  | 63.6976  |
| ARR3     | 407 cone arrestin                                            | 0.000244 | 63.5479  |
| ARHGAP1  | 392 Rho GTPase activating protein 1                          | 0.000251 | 63.3982  |
| CC-CKR-2 | 1231 monocyte chemoattractant protein 1 receptor             | 0.000251 | 63.2485  |
| HDLCQ11  | 4023 lipoprotein lipase                                      | 0.000253 | 63.0988  |
| CDHF12   | 5979 ret proto-oncogene (multiple endocrine neoplasia)       | 0.000254 | 62.9491  |
| CCL3     | 6348 small inducible cytokine A3                             | 0.000256 | 62.72455 |
| CC-CKR-5 | 1234 chemokine receptor CCR5                                 | 0.000256 | 62.72455 |
| HsT17432 | 4091 MAD, mothers against decapentaplegic homolog 6          | 0.000265 | 62.5     |
| CEBP     | 64506 cytoplasmic polyadenylation element binding protein 1  | 0.000268 | 62.3503  |
| PP2CB    | 5516 serine/threonine protein phosphatase 2A                 | 0.000269 | 62.12575 |
| PP2Ac    | 5515 protein phosphatase 2, catalytic subunit, alpha isoform | 0.000269 | 62.12575 |
| FLJ10671 | 8295 350/400 kDa PCAF-associated factor                      | 0.000271 | 61.9012  |
| AXIN     | 8312 axin 1                                                  | 0.000273 | 61.67665 |
| AXIL     | 8313 axin 2                                                  | 0.000273 | 61.67665 |
| CCL2     | 6347 small inducible cytokine A2                             | 0.000282 | 61.4521  |
| MAD7     | 6945 transcription factor-like 4                             | 0.000283 | 61.3024  |
| AKT2     | 208 v-akt murine thymoma viral oncogene homolog 2            | 0.000285 | 61.15269 |
| GIG34    | 6135 60S ribosomal protein L11                               | 0.000289 | 61.00299 |
| G0S24    | 7538 zinc finger protein, C3H type, 36 homolog (mouse)       | 0.000289 | 60.85329 |
| BXR      | 8856 pregnane X receptor                                     | 0.000294 | 60.70359 |
| BNSP     | 6696 SPP1/CALPHA1 fusion                                     | 0.000304 | 60.55389 |
| AAA      | 351 amyloid beta A4 protein                                  | 0.000308 | 60.40419 |
| C4BP     | 722 C4b binding protein, alpha chain                         | 0.000317 | 60.17964 |
| C4BP     | 725 C4b binding protein, beta chain                          | 0.000317 | 60.17964 |
| CHC      | 1213 clathrin, heavy chain (Hc)                              | 0.000319 | 59.88024 |
| INPP5F   | 4952 oculocerebrorenal syndrome of Lowe                      | 0.000319 | 59.88024 |
| CCS-3    | 1915 translation elongation factor 1 alpha 1-like 14         | 0.000322 | 59.65569 |
| CD126    | 3570 interleukin 6 receptor alpha subunit                    | 0.000356 | 59.50599 |
| CD221    | 3480 insulin-like growth factor 1 receptor                   | 0.000365 | 59.35629 |
| CD11B    | 3684 integrin alpha M                                        | 0.000368 | 59.13174 |
| CD18     | 3689 complement receptor C3 beta-subunit                     | 0.000368 | 59.13174 |
| EMC19    | 6500 transcription elongation factor B (SIII), polypeptide 1 | 0.00038  | 58.90719 |
| CD136    | 4486 macrophage stimulating 1 receptor                       | 0.00038  | 58.75749 |
| C7orf16  | 10842 G-substrate                                            | 0.000388 | 58.60778 |
| ABD-B    | 3205 homeo box A9                                            | 0.00039  | 58.45808 |
| FBP      | 8880 far upstream element-binding protein                    | 0.000397 | 58.23353 |
| CRD-BP   | 10642 insulin-like growth factor 2 mRNA binding protein 1    | 0.000397 | 58.23353 |

|             |                                                             |          |          |
|-------------|-------------------------------------------------------------|----------|----------|
| FJHN        | 6928 transcription factor 2, hepatic                        | 0.000402 | 58.00898 |
| ATF3        | 467 activating transcription factor 3                       | 0.000412 | 57.85928 |
| GDF8        | 2660 myostatin                                              | 0.00043  | 57.70958 |
| CCK-B       | 887 CCK2 receptor                                           | 0.000434 | 57.55988 |
| GRB1        | 5295 phosphoinositide-3-kinase, regulatory subunit          | 0.000455 | 57.26048 |
| P85B        | 5296 phosphoinositide-3-kinase, regulatory subunit 2        | 0.000455 | 57.26048 |
| DKFZp686F   | 8503 phosphoinositide-3-kinase, regulatory subunit          | 0.000455 | 57.26048 |
| ACT2        | 6351 lymphocyte-activation gene 1                           | 0.000459 | 56.96108 |
| IPOA1       | 3838 karyopherin alpha 2                                    | 0.00046  | 56.81138 |
| MGC12610    | 4314 matrix metalloproteinase 3                             | 0.00047  | 56.66168 |
| CLTA        | 1211 clathrin, light chain (Lca)                            | 0.000474 | 56.43713 |
| CLTB        | 1212 clathrin, light polypeptide                            | 0.000474 | 56.43713 |
| ABL         | 25 proto-oncogene tyrosine-protein kinase ABL1              | 0.000479 | 56.21257 |
| ASC         | 29108 apoptosis-associated speck-like protein               | 0.000479 | 56.06287 |
| CD55        | 1604 decay accelerating factor for complement               | 0.000496 | 55.91317 |
| Hs.89862    | 8717 tumor necrosis factor receptor type 1 associated death | 0.00051  | 55.76347 |
| DKFZp686J   | 57496 myocardin-related transcription factor B              | 0.000512 | 55.61377 |
| HNRPE1      | 5093 poly(rC)-binding protein 1                             | 0.000526 | 55.46407 |
| MGC21659    | 7069 spot 14 protein                                        | 0.000546 | 55.31437 |
| DJ-1        | 11315 protein DJ-1                                          | 0.000555 | 55.08982 |
| PI4K-BETA   | 5298 type III phosphatidylinositol 4-kinase beta            | 0.000555 | 55.08982 |
| CABP2       | 51475 calcium binding protein 2                             | 0.00056  | 54.86527 |
| ENO1        | 2023 phosphopyruvate hydratase                              | 0.000567 | 54.71557 |
| KIAA1303    | 57521 regulatory associated protein of mTOR                 | 0.000568 | 54.56587 |
| CCL7        | 6354 chemokine (C-C motif) ligand 7                         | 0.000571 | 54.41617 |
| FLJ44809    | 2475 FKBP12-rapamycin complex-associated protein 1          | 0.000593 | 54.26647 |
| FLT4        | 2324 fms-related tyrosine kinase 4                          | 0.000598 | 54.11677 |
| MYD88       | 4615 myeloid differentiation primary response gene 88       | 0.000608 | 53.96707 |
| CNTFR       | 1271 CNTFR alpha                                            | 0.00062  | 53.74251 |
| CD118       | 3977 CD118 antigen                                          | 0.00062  | 53.74251 |
| ACTRIB      | 91 serine(threonine) protein kinase receptor R2             | 0.00063  | 53.51796 |
| MGC41878    | 5579 protein kinase C, beta 1                               | 0.000655 | 53.36826 |
| DKFZp686K   | 10625 NS1-binding protein                                   | 0.00066  | 53.14371 |
| AIP         | 9049 aryl hydrocarbon receptor interacting protein          | 0.00066  | 53.14371 |
| DKFZp762F   | 55662 hypoxia-inducible factor 1, alpha subunit inhibitor   | 0.000665 | 52.91916 |
| SREBF2      | 6721 sterol regulatory element-binding protein 2            | 0.000665 | 52.76946 |
| 103AS, 15.: | 3805 NK cell receptor                                       | 0.000677 | 52.61976 |
| MGC13823    | 4838 nodal, mouse, homolog                                  | 0.000687 | 52.47006 |
| IKBKE       | 9641 inhibitor of kappa light polypeptide gene enhancer     | 0.00069  | 52.32036 |
| NEC1        | 5122 proprotein convertase subtilisin/kexin type 1          | 0.000698 | 52.17066 |
| NGR         | 65078 Nogo-66 receptor                                      | 0.0007   | 52.02096 |
| EEK         | 2046 EPH- and ELK-related tyrosine kinase                   | 0.000705 | 51.87126 |
| CCL11       | 6356 small inducible cytokine A11                           | 0.000714 | 51.72156 |
| HOX-2.6     | 3214 homeobox B4                                            | 0.000724 | 51.57186 |
| ACVRIP1     | 9863 membrane associated guanylate kinase, WW and PDZ       | 0.000727 | 51.42216 |
| PFN1        | 5216 profilin 1                                             | 0.000735 | 51.1976  |
| D3S1319E    | 5217 profilin 2                                             | 0.000735 | 51.1976  |

|           |                                                                |          |          |
|-----------|----------------------------------------------------------------|----------|----------|
| FLJ17670  | 7535 zeta-chain associated protein kinase 70kDa                | 0.000779 | 50.97305 |
| MGC70609  | 7422 vascular permeability factor                              | 0.000788 | 50.82335 |
| MGMT      | 4255 O-6-methylguanine-DNA methyltransferase                   | 0.00079  | 50.67365 |
| CK1       | 1452 down-regulated in lung cancer                             | 0.000794 | 50.52395 |
| EGR3      | 1960 zinc finger protein pilot                                 | 0.00082  | 50.37425 |
| NOR-90    | 7343 upstream binding transcription factor, RNA polymerase I   | 0.00082  | 50.22455 |
| CLOCK     | 9575 clock homolog (mouse)                                     | 0.00083  | 50.07485 |
| CSBP      | 3190 transformation upregulated nuclear protein                | 0.000854 | 49.92515 |
| D16S432E  | 51741 WW domain-containing protein WWOX                        | 0.000864 | 49.77545 |
| LYT-10    | 4791 nuclear factor of kappa light chain gene enhancer         | 0.000867 | 49.62575 |
| CCNA1     | 8900 cyclin A1                                                 | 0.000868 | 49.47605 |
| ARB2      | 409 arrestin, beta 2                                           | 0.000869 | 49.32635 |
| FLJ43224  | 4738 neural precursor cell expressed, developmentally          | 0.000871 | 49.17665 |
| RRAS      | 6237 Oncogene RRAS                                             | 0.000879 | 49.02695 |
| MGC12689  | 5020 oxytocin-neurophysin I, preproprotein                     | 0.000879 | 48.8024  |
| OT-R      | 5021 oxytocin receptor                                         | 0.000879 | 48.8024  |
| MGC11118  | 5645 trypsin 2                                                 | 0.000898 | 48.42814 |
| MTG       | 5646 trypsin 3                                                 | 0.000898 | 48.42814 |
| MGC12017  | 5644 nonfunctional trypsin 1                                   | 0.000898 | 48.42814 |
| ARF       | 1029 multiple tumor suppressor 1                               | 0.000919 | 48.12874 |
| CDC25     | 5923 Ras-specific nucleotide exchange factor CDC25             | 0.000923 | 47.97904 |
| MAD2      | 4601 Max-related transcription factor                          | 0.000933 | 47.82934 |
| PLCG2     | 5336 phospholipase C gamma 2                                   | 0.000968 | 47.60479 |
| APKD2     | 5311 polycystic kidney disease 2 (autosomal dominant)          | 0.000968 | 47.60479 |
| TCF-3     | 83439 transcription factor 7-like 1 (T-cell specific, HMG-box) | 0.001037 | 47.38024 |
| GEFT      | 115557 RAC/CDC42 exchange factor                               | 0.001041 | 47.23054 |
| ACTA      | 58 alpha skeletal muscle actin                                 | 0.001046 | 46.85629 |
| ACT       | 72 alpha-actin 3                                               | 0.001046 | 46.85629 |
| ACTC      | 70 cardiac muscle alpha actin 1                                | 0.001046 | 46.85629 |
| AAT6      | 59 actin, alpha 2, smooth muscle, aorta                        | 0.001046 | 46.85629 |
| FLJ26075  | 5605 mitogen-activated protein kinase kinase 2, p45            | 0.001054 | 46.48204 |
| DKFZp762N | 23162 homolog of Drosophila Sunday driver 2                    | 0.001061 | 46.33234 |
| CCNE2     | 9134 cyclin E2                                                 | 0.001072 | 46.18263 |
| FLJ12099  | 5602 mitogen-activated protein kinase 10                       | 0.001078 | 46.03293 |
| ABI-1     | 10006 nap1 binding protein                                     | 0.001104 | 45.88323 |
| FLJ36364  | 6932 transcription factor 7 (T-cell specific, HMG-box)         | 0.001109 | 45.58383 |
| TCF-4     | 6934 transcription factor 7-like 2 (T-cell specific, HMG-box)  | 0.001109 | 45.58383 |
| DKFZp586F | 51176 lymphoid enhancer binding factor-1                       | 0.001109 | 45.58383 |
| BA554C12. | 9978 ZYP protein                                               | 0.001109 | 45.05988 |
| ELOB      | 6923 transcription elongation factor B (SIII), polypeptide 2   | 0.001109 | 45.05988 |
| SIII      | 6921 transcription elongation factor B, polypeptide 1          | 0.001109 | 45.05988 |
| CUL2      | 8453 cullin 2                                                  | 0.001109 | 45.05988 |
| CD344     | 8322 WNT receptor frizzled-4                                   | 0.001123 | 44.68563 |
| FLH21957  | 9448 hepatocyte progenitor kinase-like/germinal center         | 0.001127 | 44.53593 |
| C23       | 4691 nucleolin                                                 | 0.001132 | 44.38623 |
| DLL4      | 54567 notch ligand DLL4                                        | 0.001132 | 44.23653 |
| ADH       | 551 arginine vasopressin-neurophysin II                        | 0.001148 | 44.08683 |



|           |       |                                                     |          |          |
|-----------|-------|-----------------------------------------------------|----------|----------|
| DKFZp686C | 79048 | selenocysteine insertion sequence binding protein 2 | 0.001161 | 43.78743 |
| MGC14353  | 84817 | thioredoxin domain containing 17                    | 0.001161 | 43.78743 |
| GRIM-12   | 7296  | thioredoxin reductase 1                             | 0.001161 | 43.78743 |
| MGC10480  | 5757  | prothymosin alpha protein                           | 0.001179 | 43.48802 |
| ARHGAP14  | 9901  | WAVE-associated Rac GTPase activating protein       | 0.001188 | 43.33832 |
| FLJ14314  | 57551 | serine/threonine kinase TAO1                        | 0.001217 | 43.11377 |
| EMK1      | 2011  | ELKL motif kinase 1                                 | 0.001217 | 43.11377 |
| TGFBRAP1  | 9392  | TGF beta receptor associated protein -1             | 0.001222 | 42.88922 |
| FLJ31482  | 8936  | verprolin homology domain-containing protein 1      | 0.001253 | 42.73952 |
| FLJ97193  | 10023 | proto-oncogene FRAT1                                | 0.001266 | 42.58982 |
| CDK4I     | 1030  | cyclin-dependent kinases 4 and 6 binding protein    | 0.001267 | 42.44012 |
| MTA1      | 9112  | metastasis associated protein                       | 0.001285 | 42.21557 |
| MSP23     | 5052  | peroxiredoxin 1                                     | 0.001285 | 42.21557 |
| CD295     | 3953  | leptin receptor                                     | 0.001293 | 41.99102 |
| CALL      | 10752 | cell adhesion molecule with homology to L1CAM       | 0.001325 | 41.84132 |
| ACAP1     | 9744  | centaurin beta1                                     | 0.001332 | 41.69162 |
| HOX2      | 3211  | homeobox B1                                         | 0.001336 | 41.54192 |
| C6        | 5688  | proteasome subunit alpha 4                          | 0.00134  | 41.39222 |
| APLP      | 333   | amyloid-like protein 1                              | 0.00136  | 41.24251 |
| FLJ25596  | 6655  | son of sevenless homolog 2                          | 0.001365 | 41.01796 |
| GF1       | 6654  | son of sevenless homolog 1                          | 0.001365 | 41.01796 |
| IRS2      | 8660  | insulin receptor substrate 2                        | 0.001373 | 40.79341 |
| FX        | 7114  | thymosin beta 4, X-linked                           | 0.001381 | 40.56886 |
| COCA2     | 4292  | MutL protein homolog 1                              | 0.001381 | 40.56886 |
| CDK8      | 1024  | CDK8 protein kinase                                 | 0.0014   | 40.34431 |
| CD49f     | 3655  | integrin alpha6B                                    | 0.001429 | 40.11976 |
| CD104     | 3691  | GP150                                               | 0.001429 | 40.11976 |
| APC       | 324   | adenomatosis polyposis coli                         | 0.001445 | 39.89521 |
| DKFZp547C | 25970 | SH2B adaptor protein 1                              | 0.001462 | 39.74551 |
| C-FMS     | 1436  | macrophage colony stimulating factor I receptor     | 0.001468 | 39.59581 |
| CCBP2     | 1238  | chemokine (C-C motif) receptor 9                    | 0.001496 | 39.44611 |
| CASP8AP2  | 9994  | human FLASH                                         | 0.001506 | 39.29641 |
| ANF       | 8820  | homeobox, ES cell expressed 1                       | 0.001513 | 39.14671 |
| DKFZp686A | 3146  | high-mobility group (nonhistone chromosomal)        | 0.001516 | 38.92216 |
| HMG2      | 3148  | high-mobility group box 2                           | 0.001516 | 38.92216 |
| DKFZp779A | 4134  | microtubule-associated protein 4                    | 0.001521 | 38.6976  |
| GNG11     | 2791  | guanine nucleotide-binding protein G(I)/G(S)/G(O)   | 0.001551 | 38.3982  |
| KIAA1415  | 57580 | phosphatidylinositol-3,4,5-trisphosphate-dependent  | 0.001551 | 38.3982  |
| G(gamma): | 51764 | guanine nucleotide binding protein (G protein)      | 0.001551 | 38.3982  |
| CACNB3    | 784   | calcium channel, voltage-dependent, beta 3 subunit  | 0.001562 | 38.0988  |
| CKBBP2    | 90480 | papillomavirus L2 interacting nuclear protein 1     | 0.001564 | 37.9491  |
| GLUH1     | 2890  | glutamate receptor, ionotropic, AMPA 1              | 0.001579 | 37.72455 |
| DKFZp781F | 5924  | Ras protein-specific guanine nucleotide-releasing   | 0.001579 | 37.72455 |
| VAV2      | 7410  | Protein vav-2                                       | 0.001583 | 37.5     |
| ARH       | 26119 | LDL receptor adaptor protein                        | 0.001621 | 37.3503  |
| ANCR      | 7337  | ubiquitin protein ligase E3A                        | 0.001666 | 37.2006  |
| G-ALPHA-h | 7052  | TGase-H                                             | 0.001741 | 37.0509  |

|            |                                                                  |          |          |
|------------|------------------------------------------------------------------|----------|----------|
| APBA1      | 320 amyloid beta A4 precursor protein-binding, family A          | 0.001755 | 36.9012  |
| FKHL8      | 2297 forkhead box D1                                             | 0.001817 | 36.7515  |
| ARNO       | 9266 cytohesin 2                                                 | 0.001826 | 36.6018  |
| ARF6       | 382 ADP-ribosylation factor 6                                    | 0.001883 | 36.37725 |
| ARFGEP10C  | 9922 IQ motif and Sec7 domain 1                                  | 0.001883 | 36.37725 |
| FLJ12859   | 23528 ZNP-99 transcription factor                                | 0.001884 | 36.15269 |
| DOCK1      | 1793 dedicator of cyto-kinesis 1                                 | 0.001909 | 36.00299 |
| GPCR       | 117196 MAS-related GPR, member X4                                | 0.00191  | 35.77844 |
| GPCR       | 259249 MAS-related GPR, member X1                                | 0.00191  | 35.77844 |
| CNTF       | 1270 ciliary neurotrophic factor                                 | 0.001925 | 35.55389 |
| DKFZp586C  | 9477 Trf (TATA binding protein-related factor)-proximal          | 0.00194  | 35.40419 |
| VASP       | 7408 vasodilator-stimulated phosphoprotein                       | 0.00194  | 35.25449 |
| MEF2C      | 4208 MADS box transcription enhancer factor 2, polypeptide C (my | 0.001953 | 34.88024 |
| DKFZp686I  | 4209 myocyte enhancer factor 2D                                  | 0.001953 | 34.88024 |
| FLJ32599   | 4207 myocyte enhancer factor 2B                                  | 0.001953 | 34.88024 |
| ADCAD1     | 4205 myocyte enhancer factor 2A                                  | 0.001953 | 34.88024 |
| DOCK2      | 1794 dedicator of cytokinesis 2                                  | 0.001958 | 34.50599 |
| PAR-6, PAR | 50855 partitioning-defective protein 6                           | 0.001969 | 34.35629 |
| CSNK1E     | 1454 casein kinase 1 epsilon                                     | 0.002066 | 34.20659 |
| KLK7       | 5650 stratum corneum chymotryptic enzyme                         | 0.002086 | 34.05689 |
| DKFZp686C  | 171024 genethonin 2                                              | 0.002157 | 33.90719 |
| AAD10      | 8085 trinucleotide repeat containing 21                          | 0.002197 | 33.75749 |
| ARHGEF14   | 23263 MCF2 transforming sequence-like protein                    | 0.002222 | 33.60778 |
| IGIF       | 3606 interleukin-18                                              | 0.00224  | 33.38323 |
| CD218a     | 8809 IL1 receptor-related protein                                | 0.00224  | 33.38323 |
| RPS6       | 6194 phosphoprotein NP33                                         | 0.002263 | 33.15868 |
| AGER       | 177 advanced glycosylation end product-specific receptor         | 0.002315 | 33.00898 |
| DKFZp566J  | 9039 UBA3, ubiquitin-activating enzyme E1 homolog                | 0.002362 | 32.78443 |
| A-116A10.1 | 8883 NEDD8-activating enzyme E1 subunit                          | 0.002362 | 32.78443 |
| CHEDG1     | 1901 sphingosine 1-phosphate receptor EDG1                       | 0.002365 | 32.55988 |
| CHN        | 8013 chondrosarcoma, extraskeletal myxoid, fused to EWS          | 0.002432 | 32.26048 |
| H1         | 6013 prorelaxin                                                  | 0.002432 | 32.26048 |
| 1200006M   | 55827 androgen receptor complex-associated protein               | 0.002432 | 32.26048 |
| OS9        | 10956 amplified in osteosarcoma                                  | 0.002472 | 31.96108 |
| DKFZp781F  | 9788 missing in metastasis                                       | 0.002498 | 31.81138 |
| KIAA0339   | 9739 SET domain containing 1A                                    | 0.002518 | 31.66168 |
| CARD12     | 58484 caspase recruitment domain family, member 12               | 0.002534 | 31.51198 |
| BAF155     | 6599 chromatin remodeling complex BAF155 subunit                 | 0.002547 | 31.36228 |
| NK1R       | 6869 NK-1 receptor                                               | 0.002575 | 31.21257 |
| AMPH2      | 274 bridging integrator 1                                        | 0.002587 | 31.06287 |
| GABATHG    | 6529 solute carrier family 6                                     | 0.002591 | 30.76347 |
| HPC-1      | 6804 syntaxin 1A (brain)                                         | 0.002591 | 30.76347 |
| FLJ12615   | 64398 MAGUK p55 subfamily member 5                               | 0.002591 | 30.76347 |
| ARNO3      | 9265 general receptor of phosphoinositides 1                     | 0.002622 | 30.46407 |
| CHIP       | 10273 serologically defined colon cancer antigen 7               | 0.00271  | 30.23952 |
| ARA70      | 8031 nuclear receptor coactivator 4                              | 0.00271  | 30.23952 |
| ASCL1      | 429 achaete-scute homolog 1                                      | 0.002862 | 30.01497 |

|           |        |                                                        |          |          |
|-----------|--------|--------------------------------------------------------|----------|----------|
| KIAA0595  | 23082  | peroxisome proliferator-activated receptor gamma       | 0.002874 | 29.86527 |
| APOA1     | 335    | apolipoprotein A1                                      | 0.002973 | 29.71557 |
| CALCOCO1  | 57658  | coiled-coil transcriptional coactivator                | 0.003009 | 29.41617 |
| CUL4B     | 8450   | cullin-4B                                              | 0.003009 | 29.41617 |
| HZF-3     | 4929   | transcriptionally inducible nuclear receptor related 1 | 0.003009 | 29.41617 |
| FLOT1     | 10211  | flotillin 1                                            | 0.003087 | 29.11677 |
| FLJ00280  | 6256   | retinoid X receptor, alpha                             | 0.00312  | 28.81737 |
| MGC12657  | 8828   | neuropilin-2a(22)                                      | 0.00312  | 28.81737 |
| HAP       | 5915   | retinoic acid receptor, beta polypeptide               | 0.00312  | 28.81737 |
| B2-1      | 9267   | homolog of secretory protein SEC7                      | 0.003205 | 28.51796 |
| LIMK      | 3984   | LIM domain kinase 1                                    | 0.003333 | 28.21856 |
| C4orf1    | 10463  | chromosome 4 open reading frame 1                      | 0.003333 | 28.21856 |
| AIRE      | 326    | autoimmune regulator                                   | 0.003333 | 28.21856 |
| BITH      | 83658  | cytoplasmic dynein light chain 2A                      | 0.003395 | 27.91916 |
| Flt4-L    | 7424   | vascular endothelial growth factor-related protein     | 0.003403 | 27.76946 |
| APCA      | 773    | brain calcium channel 1                                | 0.003429 | 27.61976 |
| ARHG      | 391    | ras homolog gene family, member G (rho G)              | 0.00346  | 27.39521 |
| DOCK4     | 9732   | dedicator of cytokinesis 4                             | 0.00346  | 27.39521 |
| MSK2      | 8986   | mitogen- and stress-activated protein kinase 2         | 0.003464 | 27.09581 |
| MGC1911   | 9252   | mitogen- and stress-activated protein kinase 1         | 0.003464 | 27.09581 |
| FIGF      | 2277   | vascular endothelial growth factor D                   | 0.003485 | 26.87126 |
| CAS       | 1434   | CSE1 chromosome segregation 1-like protein             | 0.003486 | 26.72156 |
| ACTN1     | 87     | F-actin cross-linking protein                          | 0.0035   | 26.57186 |
| MSI1      | 4440   | Musashi (Drosophila) homolog 1                         | 0.003509 | 26.42216 |
| AC068139. | 6435   | surfactant, pulmonary-associated protein A1B           | 0.003537 | 26.27246 |
| CRARF     | 5648   | manan-binding lectin serine protease-1                 | 0.003632 | 26.12275 |
| CACH2     | 775    | voltage-gated calcium channel alpha subunit Cav1.2     | 0.003709 | 25.8982  |
| CAB1      | 782    | dihydropyridine-sensitive L-type, calcium channel      | 0.003709 | 25.8982  |
| EPHA4     | 2043   | tyrosine-protein kinase receptor SEK                   | 0.003731 | 25.67365 |
| PAX2      | 5076   | paired box protein 2                                   | 0.003739 | 25.52395 |
| HMOX2     | 3163   | heme oxygenase (decycling) 2                           | 0.00375  | 25.2994  |
| CACNB2    | 783    | calcium channel, voltage-dependent, beta 2 subunit     | 0.00375  | 25.2994  |
| B56A      | 5525   | serine/threonine protein phosphatase 2A, 56 kDa        | 0.003813 | 25.07485 |
| DBS       | 4036   | Heymann nephritis antigen homolog                      | 0.003926 | 24.92515 |
| KOR-3     | 4987   | kappa3-related opioid receptor                         | 0.00394  | 24.7006  |
| GPR74     | 10886  | neuropeptide FF 2                                      | 0.00394  | 24.7006  |
| HOP       | 10963  | stress-induced-phosphoprotein 1                        | 0.004052 | 24.32635 |
| FLJ14581  | 10527  | RAN binding protein 7                                  | 0.004052 | 24.32635 |
| H2        | 6019   | prorelaxin H2                                          | 0.004052 | 24.32635 |
| EPHA3     | 2042   | ephrin receptor EphA3                                  | 0.004082 | 24.02695 |
| CNR2      | 56142  | KIAA0345-like 8                                        | 0.004159 | 23.87725 |
| CNR1      | 56144  | ortholog of mouse CNR1                                 | 0.004204 | 23.72754 |
| DKFZp586I | 8498   | RAN-binding protein-3                                  | 0.004238 | 23.57784 |
| AVPR1B    | 553    | antidiuretic hormone receptor 1B                       | 0.004254 | 23.42814 |
| EAT2      | 117157 | SH2 domain-containing molecule EAT2                    | 0.004294 | 23.27844 |
| BTEB      | 687    | basic transcription element binding protein 1          | 0.004299 | 23.12874 |
| C8FW      | 10221  | G-protein-coupled receptor induced protein             | 0.004418 | 22.97904 |

|           |        |                                                       |          |          |
|-----------|--------|-------------------------------------------------------|----------|----------|
| ALXR      | 2358   | lipoxin A4 receptor (formyl peptide receptor related) | 0.004422 | 22.82934 |
| GP6       | 51206  | glycoprotein VI (platelet)                            | 0.004458 | 22.67964 |
| CD2AP     | 23607  | CD2-associated protein                                | 0.004622 | 22.52994 |
| FLJ14040  | 84148  | MYST histone acetyltransferase 1                      | 0.004663 | 22.38024 |
| DAZ       | 1617   | deleted in azoospermia                                | 0.004763 | 22.00599 |
| DAZ2      | 57055  | deleted in azoospermia 2                              | 0.004763 | 22.00599 |
| DAZ3      | 57054  | deleted in azoospermia 3                              | 0.004763 | 22.00599 |
| DAZ       | 57135  | deleted in azoospermia 4                              | 0.004763 | 22.00599 |
| SCAP1     | 8631   | src kinase associated phosphoprotein 1                | 0.004809 | 21.63174 |
| AHH       | 57491  | aryl hydrocarbon receptor regulator                   | 0.004877 | 21.48204 |
| IFI-4     | 4938   | 2-5A synthetase 1                                     | 0.004962 | 21.33234 |
| PTP-PEST  | 5782   | protein-tyrosine phosphatase G1                       | 0.005033 | 21.18263 |
| DUET      | 8997   | serine/threonine kinase with Dbl- and pleckstrin      | 0.005266 | 21.03293 |
| CSCD      | 1634   | small leucine-rich protein 1B                         | 0.005296 | 20.88323 |
| HTF9A     | 5902   | RAN binding protein 1                                 | 0.005331 | 20.73353 |
| APT1LG1   | 356    | tumor necrosis factor (ligand) superfamily, member 6  | 0.005389 | 20.58383 |
| FLJ20819  | 7879   | Ras-associated protein RAB7                           | 0.005432 | 20.43413 |
| ATBF1     | 463    | AT motif-binding factor 1                             | 0.005459 | 20.28443 |
| SSTR2     | 6752   | somatostatin receptor 2                               | 0.005624 | 20.13473 |
| ACPA      | 5657   | proteinase 3 (serine proteinase, neutrophil, Wegener) | 0.005639 | 19.98503 |
| HES5      | 388585 | hairy and enhancer of split 5 (Drosophila)            | 0.005766 | 19.83533 |
| MMP11     | 4320   | matrix metalloproteinase 11                           | 0.005795 | 19.68563 |
| FMOD      | 2331   | fibromodulin proteoglycan                             | 0.005814 | 19.53593 |
| EMT       | 3702   | tyrosine-protein kinase ITK/TSK                       | 0.005843 | 19.38623 |
| FLJ23079  | 6616   | synaptosomal-associated protein 25                    | 0.005867 | 19.23653 |
| TBXA2R    | 6915   | prostanoid TP receptor                                | 0.005927 | 19.08683 |
| FLJ11460  | 6844   | synaptobrevin 2                                       | 0.005929 | 18.93713 |
| COLEC7    | 6441   | pulmonary surfactant-associated protein D             | 0.006327 | 18.78743 |
| BKLF3     | 11279  | Kruppel-like factor 8                                 | 0.006534 | 18.63772 |
| ADRA2     | 150    | alpha2A adrenergic receptor                           | 0.006748 | 18.48802 |
| AD2       | 348    | apolipoprotein E3                                     | 0.006815 | 18.26347 |
| APOB      | 338    | apolipoprotein B48                                    | 0.006815 | 18.26347 |
| CAIN      | 8021   | nucleoporin 214kDa                                    | 0.006872 | 17.96407 |
| 2PP2A     | 6418   | template-activating factor I                          | 0.006872 | 17.96407 |
| ATP1A1    | 476    | Na <sup>+</sup> /K <sup>+</sup> ATPase 1              | 0.006923 | 17.73952 |
| BACH1     | 571    | BTB and CNC homology 1, basic leucine zipper          | 0.007038 | 17.58982 |
| CBBM      | 5956   | opsin 1 (cone pigments), long-wave-sensitive          | 0.00707  | 17.44012 |
| DKFZp686E | 6184   | dolichyl-diphosphooligosaccharide-protein             | 0.007106 | 17.29042 |
| BM600     | 3909   | epiligrin alpha 3 subunit                             | 0.007137 | 17.14072 |
| ANX1      | 301    | annexin I                                             | 0.007337 | 16.91617 |
| CHAK      | 54822  | transient receptor potential cation channel           | 0.007337 | 16.91617 |
| ASIP      | 56288  | atypical PKC isotype-specific interacting protein     | 0.007373 | 16.69162 |
| APC3      | 996    | cell division cycle protein 27                        | 0.007431 | 16.54192 |
| BS4       | 51667  | NY-REN-18 antigen                                     | 0.007562 | 16.39222 |
| KAT6A     | 7994   | MYST histone acetyltransferase (monocytic leukemia)   | 0.007693 | 16.24251 |
| TCL1      | 8115   | T-cell leukemia/lymphoma 1A                           | 0.007871 | 16.09281 |
| ERBA-BETA | 7068   | generalized resistance to thyroid hormone             | 0.007931 | 15.94311 |

|           |        |                                                            |          |          |
|-----------|--------|------------------------------------------------------------|----------|----------|
| CPLX1     | 10815  | complexin 1                                                | 0.008057 | 15.79341 |
| AFP       | 174    | alpha-1-fetoprotein                                        | 0.008084 | 15.64371 |
| CFND      | 1947   | ephrin-B1                                                  | 0.008178 | 15.49401 |
| CFL       | 1072   | cofilin 1 (non-muscle)                                     | 0.008296 | 15.34431 |
| MGC39961  | 10762  | nucleoporin 50kDa                                          | 0.0087   | 15.19461 |
| ABRI      | 9445   | BRICHOS domain containing 2B                               | 0.009075 | 15.04491 |
| DKFZp686E | 4131   | microtubule-associated protein 1B                          | 0.009162 | 14.89521 |
| BM600-12E | 3914   | laminin B1k chain                                          | 0.009506 | 14.67066 |
| B2T       | 3918   | laminin, gamma 2 (nicein (100kD), kalinin (105kD))         | 0.009506 | 14.67066 |
| F9        | 2158   | factor IX                                                  | 0.009574 | 14.44611 |
| C11orf43  | 3481   | putative insulin-like growth factor II associated protein  | 0.009704 | 14.29641 |
| C4        | 720    | acidic C4                                                  | 0.010354 | 13.84731 |
| GPR24     | 2847   | G-protein coupled receptor 24                              | 0.010354 | 13.84731 |
| C3B-INA   | 3426   | light chain of factor I                                    | 0.010354 | 13.84731 |
| C4A       | 721    | basic C4                                                   | 0.010354 | 13.84731 |
| C5L2      | 27202  | G protein-coupled receptor 77                              | 0.010354 | 13.84731 |
| DKFZp667C | 10482  | nuclear RNA export factor 1                                | 0.01037  | 13.3982  |
| A-152E5.1 | 6367   | stimulated T cell chemotactic protein 1                    | 0.010435 | 13.2485  |
| LRP       | 9961   | major vault protein                                        | 0.010449 | 12.9491  |
| FLJ92613  | 2550   | GABA-B receptor                                            | 0.010449 | 12.9491  |
| FLJ36928  | 9568   | G protein-coupled receptor 51                              | 0.010449 | 12.9491  |
| ARMD9     | 718    | acylation-stimulating protein cleavage product             | 0.010545 | 12.6497  |
| CMT1F     | 4747   | neurofilament, light polypeptide 68kDa                     | 0.010655 | 12.5     |
| ADAP      | 2533   | FYN-binding protein (FYB-120/130)                          | 0.011037 | 12.3503  |
| 5-HT1A    | 3350   | G protein coupled receptor                                 | 0.011549 | 12.2006  |
| DKFZp781F | 80314  | enhancer of polycomb 1                                     | 0.011562 | 12.0509  |
| LUN       | 10210  | nucleoporin 50kDa                                          | 0.011658 | 11.9012  |
| SCAR2     | 10163  | suppressor of cyclic-AMP receptor (WASP-family)            | 0.011962 | 11.7515  |
| CUL5      | 8065   | Vasopressin-activated calcium-mobilizing receptor-1        | 0.012088 | 11.6018  |
| ACTDP     | 11034  | destrin                                                    | 0.012746 | 11.4521  |
| KIAA0965  | 23012  | serine/threonine kinase 38 like                            | 0.012749 | 11.3024  |
| HRMT1L3   | 10196  | protein arginine methyltransferase 3                       | 0.012994 | 11.15269 |
| BMP6      | 654    | bone morphogenetic protein 6                               | 0.013028 | 11.00299 |
| CD3E      | 916    | CD3e antigen, epsilon polypeptide (TiT3 complex)           | 0.013155 | 10.85329 |
| RAB10     | 10890  | ras-related GTP-binding protein RAB10                      | 0.013201 | 10.70359 |
| CBX       | 10951  | heterochromatin protein p25 beta                           | 0.013441 | 10.55389 |
| ASBAPP2   | 5069   | pregnancy-associated plasma protein A, pappalysin 1        | 0.013695 | 10.40419 |
| JDP2      | 122953 | Jun dimerization protein 2                                 | 0.013695 | 10.25449 |
| MGC33401  | 7073   | TIA1 cytotoxic granule-associated RNA-binding              | 0.013714 | 10.10479 |
| BAF170    | 6601   | SWI3-like protein                                          | 0.014002 | 9.95509  |
| DKFZp686L | 55929  | DNMT1 associated protein 1                                 | 0.015385 | 9.730539 |
| DKFZp313C | 9628   | H_DJ1108A12.1                                              | 0.015385 | 9.730539 |
| CLG1      | 4317   | PMNL collagenase                                           | 0.015572 | 9.505988 |
| GLK       | 8491   | germinal center kinase-related protein kinase              | 0.0156   | 9.356287 |
| C19orf3   | 10755  | regulator of G-protein signalling 19 interacting protein 1 | 0.015797 | 9.206587 |
| NEK6      | 10783  | putative serine-threonine protein kinase                   | 0.015825 | 8.982036 |
| NEK7      | 140609 | NIMA (never in mitosis gene a)-related kinase 7            | 0.015825 | 8.982036 |

|           |        |                                                         |          |          |
|-----------|--------|---------------------------------------------------------|----------|----------|
| KARS      | 3735   | lysyl-tRNA synthetase                                   | 0.016024 | 8.757485 |
| CD7       | 924    | CD7 antigen                                             | 0.016248 | 8.607784 |
| TLR7      | 51284  | toll-like receptor 7                                    | 0.016251 | 8.458084 |
| BMP14     | 8200   | cartilage-derived morphogenetic protein-1               | 0.017    | 8.308383 |
| ELA1      | 1990   | pancreatic elastase I                                   | 0.017171 | 8.158683 |
| KIAA1119  | 4645   | myosin VB                                               | 0.018064 | 8.008982 |
| K17       | 3872   | keratin 17                                              | 0.018536 | 7.859281 |
| HNRNPA1   | 3178   | heterogeneous nuclear ribonucleoprotein core protein A1 | 0.02055  | 7.709581 |
| CRSP150   | 9282   | human homolog of yeast RGR1                             | 0.022698 | 7.55988  |
| GS2       | 5873   | RAB27A, member RAS oncogene family                      | 0.023049 | 7.41018  |
| AGTAVPRL  | 114548 | cryopyrin                                               | 0.023195 | 7.260479 |
| HHR23B    | 5887   | XP-C repair complementing complex 58 kDa                | 0.023221 | 6.511976 |
| LPP       | 4026   | LIM domain containing preferred translocation partner   | 0.023221 | 6.511976 |
| PCTP      | 58488  | phosphatidylcholine transfer protein                    | 0.023221 | 6.511976 |
| CREB3     | 10488  | cyclic AMP response element (CRE)-binding protein       | 0.023221 | 6.511976 |
| AIO       | 22806  | aiolos                                                  | 0.023221 | 6.511976 |
| FLJ30414  | 3094   | histidine triad nucleotide binding protein 1            | 0.023221 | 6.511976 |
| CHA       | 10732  | transcription factor-like 5 (basic helix-loop-helix)    | 0.023221 | 6.511976 |
| DKFZp761N | 83667  | sestrin 2                                               | 0.023221 | 6.511976 |
| SSTR5     | 6755   | somatostatin receptor subtype 5                         | 0.023221 | 6.511976 |
| UNC5B     | 219699 | transmembrane receptor Unc5H2                           | 0.023589 | 5.763473 |
| HsT17454  | 5607   | MAP kinase kinase MEK5b                                 | 0.023976 | 5.613772 |
| CD204     | 4481   | macrophage scavenger receptor type III                  | 0.02472  | 5.464072 |
| DKFZp547N | 23567  | zinc finger protein 346                                 | 0.027892 | 5.314371 |
| CAT       | 847    | catalase                                                | 0.028643 | 5.164671 |
| HDNF      | 4908   | neurotrophin 3                                          | 0.028774 | 5.01497  |
| PROP1     | 5626   | prophet of Pit1, paired-like homeodomain                | 0.028904 | 4.865269 |
| CD27      | 939    | T cell activation antigen S152                          | 0.030161 | 4.715569 |
| HNRPE2    | 5094   | alpha-CP2                                               | 0.030375 | 4.416168 |
| FLJ45792  | 23236  | inositoltrisphosphohydrolase                            | 0.030375 | 4.416168 |
| SFRS3     | 6428   | splicing factor, arginine/serine-rich, 20-kD            | 0.030375 | 4.416168 |
| CYT4      | 27128  | cytohesin-4                                             | 0.031011 | 4.116766 |
| FLJ41337  | 8500   | PTPRF interacting protein alpha 1                       | 0.032555 | 3.967066 |
| DLG3      | 1741   | synapse-associated protein 102                          | 0.032587 | 3.817365 |
| CRTR1     | 29842  | transcription factor CP2-like 1                         | 0.03262  | 3.667665 |
| CD281     | 7096   | Toll/interleukin-1 receptor-like                        | 0.032763 | 3.517964 |
| ATSV      | 547    | kinesin, heavy chain, member 1A, homolog of mouse       | 0.033071 | 3.368263 |
| NKD2      | 85409  | Dvl-binding protein NKD2                                | 0.033372 | 3.218563 |
| ERG1      | 3757   | potassium channel HERG1                                 | 0.035442 | 3.068862 |
| CRL       | 133396 | gp130-like monocyte receptor                            | 0.036669 | 2.919162 |
| FLJ11090  | 55775  | tyrosyl-DNA phosphodiesterase 1                         | 0.036767 | 2.769461 |
| DKFZp547N | 79364  | ZXD family zinc finger C                                | 0.040633 | 2.54491  |
| CHO1      | 9493   | mitotic kinesin-like 1                                  | 0.040633 | 2.54491  |
| CAP-3     | 5272   | protease inhibitor 9 (ovalbumin type)                   | 0.040718 | 2.320359 |
| MGC16699  | 5797   | protein tyrosine phosphatase, receptor type             | 0.041542 | 2.095808 |
| CD113     | 25945  | poliovirus receptor-related 3                           | 0.041542 | 2.095808 |
| DKFZp547K | 5936   | RNA binding motif protein 4                             | 0.045361 | 1.871257 |

|          |        |                                                        |          |          |
|----------|--------|--------------------------------------------------------|----------|----------|
| AMPH     | 273    | Stiff-Man syndrome with breast cancer 128kDa           | 0.045807 | 1.721557 |
| C3G      | 2889   | guanine nucleotide-releasing factor 2                  | 0.045905 | 1.422156 |
| PPP2R3   | 5523   | Serine/threonine protein phosphatase 2A                | 0.045905 | 1.422156 |
| CDC2L2   | 728642 | PITSLRE protein kinase beta                            | 0.045905 | 1.422156 |
| ACLP     | 165    | aortic carboxypeptidase-like protein                   | 0.046182 | 1.122754 |
| EIF3-P42 | 8666   | eukaryotic translation initiation factor 3 subunit p42 | 0.047311 | 0.973054 |
| DKK-2    | 27123  | dickkopf homolog 2                                     | 0.048118 | 0.823353 |
| FLJ16302 | 4855   | Notch homolog 4 (Drosophila)                           | 0.048968 | 0.449102 |
| CADASIL  | 4854   | Notch homolog 3 (Drosophila)                           | 0.048968 | 0.449102 |
| AGS2     | 4853   | Notch homolog 2 (Drosophila)                           | 0.048968 | 0.449102 |
| NOTCH1   | 4851   | neurogenic locus notch homolog protein 1               | 0.048968 | 0.449102 |
| CRES     | 10047  | cystatin-related epididymal spermatogenic protein      | 0.049313 | 0.07485  |

Topologically significant genes from truncated set of proteomics data

| Symbol    | Entrez_ID | Description                                              | p value  | percentile |
|-----------|-----------|----------------------------------------------------------|----------|------------|
| MYC       | 4609      | myc proto-oncogene protein                               | 2.27E-07 | 99.9115    |
| DKFZp586f | 51176     | lymphoid enhancer binding factor-1                       | 3.11E-07 | 99.46903   |
| FLJ36364  | 6932      | transcription factor 7 (T-cell specific, HMG-box)        | 3.11E-07 | 99.46903   |
| TCF-3     | 83439     | transcription factor 7-like 1 (T-cell specific, HMG-box) | 3.11E-07 | 99.46903   |
| TCF-4     | 6934      | transcription factor 7-like 2 (T-cell specific, HMG-box) | 3.11E-07 | 99.46903   |
| EPHEXIN   | 25791     | ephexin                                                  | 5.53E-07 | 98.93805   |
| MGC11154  | 5879      | migration-inducing gene 5                                | 5.53E-07 | 98.93805   |
| NOR-90    | 7343      | upstream binding transcription factor, RNA polymerase    | 5.79E-07 | 98.67257   |
| FLJ12099  | 5602      | mitogen-activated protein kinase 10                      | 9.03E-07 | 98.49558   |
| IRF-1     | 3659      | interferon regulatory factor-1                           | 1.12E-06 | 98.31858   |
| GCCR      | 2908      | glucocorticoid receptor                                  | 1.16E-06 | 98.14159   |
| BCL2      | 596       | B-cell CLL/lymphoma 2                                    | 1.19E-06 | 97.9646    |
| HIRS-1    | 3667      | insulin receptor substrate 1                             | 1.33E-06 | 97.78761   |
| BHLHB2    | 8553      | differentially expressed in chondrocytes 1               | 1.8E-06  | 97.61062   |
| MGC26306  | 9414      | tight junction protein 2 (zona occludens 2)              | 1.81E-06 | 97.43363   |
| CAP20     | 1026      | CDK-interaction protein 1                                | 2.03E-06 | 97.25664   |
| ARF       | 1029      | multiple tumor suppressor 1                              | 2.27E-06 | 97.07965   |
| DKFZp686f | 3065      | histone deacetylase 1                                    | 2.6E-06  | 96.90265   |
| BP-8      | 4904      | nuclease sensitive element binding protein 1             | 3.25E-06 | 96.72566   |
| NOTCH1    | 4851      | neurogenic locus notch homolog protein 1                 | 3.43E-06 | 96.54867   |
| LYT-10    | 4791      | nuclear factor of kappa light chain gene enhancer        | 3.65E-06 | 96.37168   |
| CEBP      | 64506     | cytoplasmic polyadenylation element binding protein 1    | 3.77E-06 | 96.19469   |
| AAA       | 351       | amyloid beta A4 protein                                  | 3.83E-06 | 96.0177    |
| DELTA     | 7528      | YY1 transcription factor                                 | 4.16E-06 | 95.84071   |
| IPOA1     | 3838      | karyopherin alpha 2                                      | 4.39E-06 | 95.66372   |
| G(gamma): | 51764     | guanine nucleotide binding protein (G protein), gamma 13 | 4.97E-06 | 95.22124   |
| GNB1      | 2782      | transducin beta chain 1                                  | 4.97E-06 | 95.22124   |
| GNG11     | 2791      | guanine nucleotide-binding protein G(I)/G(S)/G(O)        | 4.97E-06 | 95.22124   |
| KIAA1415  | 57580     | phosphatidylinositol-3,4,5-trisphosphate                 | 4.97E-06 | 95.22124   |
| BMK1      | 5598      | mitogen-activated protein kinase 7                       | 5.3E-06  | 94.77876   |
| HNRPE1    | 5093      | poly(rC)-binding protein 1                               | 5.37E-06 | 94.60177   |
| HA6116    | 9759      | histone deacetylase 4                                    | 5.63E-06 | 94.42478   |
| MGC88021  | 5187      | circadian pacemaker protein RIGUI                        | 5.88E-06 | 94.24779   |
| ETV3      | 2117      | ets variant gene 3, ETS family transcriptional repressor | 5.98E-06 | 94.0708    |
| ENX-1     | 2146      | enhancer of zeste homolog 2 (Drosophila)                 | 6.07E-06 | 93.89381   |
| AGO       | 55294     | F-box and WD-40 domain protein 7                         | 6.15E-06 | 93.71681   |
| ASCL1     | 429       | achaete-scute homolog 1                                  | 6.45E-06 | 93.53982   |
| CASP8AP2  | 9994      | human FLASH                                              | 6.47E-06 | 93.36283   |
| DKFZp781f | 9788      | missing in metastasis                                    | 6.55E-06 | 93.18584   |
| Hs.54452  | 10320     | Ikaros (zinc finger protein)                             | 6.58E-06 | 93.00885   |
| FLJ36302  | 7074      | T-cell lymphoma invasion and metastasis 1                | 7.1E-06  | 92.83186   |
| MAZ       | 4150      | zinc-finger protein, 87 kilodaltons                      | 7.13E-06 | 92.65487   |
| E2F-5     | 1875      | E2F transcription factor 5, p130-binding                 | 7.75E-06 | 92.47788   |
| ENO1      | 2023      | phosphopyruvate hydratase                                | 7.97E-06 | 92.30088   |
| CHEDG1    | 1901      | sphingosine 1-phosphate receptor EDG1                    | 8.09E-06 | 92.12389   |



|           |                                                              |          |          |
|-----------|--------------------------------------------------------------|----------|----------|
| KPD       | 5078 paired box gene 4                                       | 8.52E-06 | 91.9469  |
| CBF1      | 3516 recombining binding protein suppressor of hairless      | 8.96E-06 | 91.76991 |
| HsT17454  | 5607 MAP kinase kinase MEK5b                                 | 1.07E-05 | 91.59292 |
| ARVD12    | 3728 catenin (cadherin-associated protein), gamma (80kD)     | 1.07E-05 | 91.41593 |
| DKFZp779k | 5291 PI3-kinase p110 subunit beta                            | 1.08E-05 | 91.23894 |
| AMPH2     | 274 bridging integrator 1                                    | 1.08E-05 | 91.06195 |
| ELK4      | 2005 SRF accessory protein 1                                 | 1.1E-05  | 90.88496 |
| BRCA1     | 672 breast and ovarian cancer susceptibility protein 1       | 1.1E-05  | 90.70796 |
| ETS2      | 2114 oncogene ETS-2                                          | 1.17E-05 | 90.53097 |
| CRD-BP    | 10642 insulin-like growth factor 2 mRNA binding protein 1    | 1.17E-05 | 90.26549 |
| FBP       | 8880 far upstream element-binding protein                    | 1.17E-05 | 90.26549 |
| HES5      | 388585 hairy and enhancer of split 5 (Drosophila)            | 1.19E-05 | 90       |
| DKFZp686C | 4790 nuclear factor kappa-B, subunit 1                       | 1.24E-05 | 89.82301 |
| MGC13844  | 4772 nuclear factor of activated T-cells, cytoplasmic        | 1.27E-05 | 89.64602 |
| BORIS     | 140690 CCCTC-binding factor-like protein                     | 1.27E-05 | 89.46903 |
| EMT       | 3702 tyrosine-protein kinase ITK/TSK                         | 1.29E-05 | 89.29204 |
| DKFZp686E | 2931 glycogen synthase kinase 3 alpha                        | 1.3E-05  | 89.02655 |
| GSK3B     | 2932 glycogen synthase kinase 3 beta                         | 1.3E-05  | 89.02655 |
| GRIN1     | 2902 glutamate [NMDA] receptor subunit zeta 1                | 1.34E-05 | 88.76106 |
| E2F-1     | 1869 retinoblastoma-associated protein 1                     | 1.35E-05 | 88.58407 |
| HSF1      | 3297 heat shock transcription factor 1                       | 1.39E-05 | 88.40708 |
| PP2Ac     | 5515 protein phosphatase 2, catalytic subunit, alpha isoform | 1.4E-05  | 88.14159 |
| PP2CB     | 5516 serine/threonine protein phosphatase 2A                 | 1.4E-05  | 88.14159 |
| DKFZp686E | 6772 signal transducer and activator of transcription-1      | 1.46E-05 | 87.87611 |
| I-REL     | 5971 v-rel avian reticuloendotheliosis viral oncogene        | 1.54E-05 | 87.69912 |
| G0S24     | 7538 zinc finger protein, C3H type, 36 homolog (mouse)       | 1.79E-05 | 87.52212 |
| CD104     | 3691 GP150                                                   | 1.8E-05  | 87.25664 |
| CD49f     | 3655 integrin alpha6B                                        | 1.8E-05  | 87.25664 |
| ARP1      | 5308 solurshin                                               | 1.85E-05 | 86.99115 |
| B1F       | 2494 liver receptor homolog-1                                | 1.91E-05 | 86.81416 |
| HOX-2.6   | 3214 homeobox B4                                             | 1.95E-05 | 86.63717 |
| MSP23     | 5052 peroxiredoxin 1                                         | 1.96E-05 | 86.46018 |
| FBL1      | 6502 CDK2/cyclin A-associated protein p45                    | 2.09E-05 | 86.28319 |
| KIAA1047  | 9611 nuclear receptor co-repressor 1                         | 2.12E-05 | 86.10619 |
| AAP1      | 23429 ring1 interactor RYBP                                  | 2.13E-05 | 85.9292  |
| GRF-1     | 2909 glucocorticoid receptor DNA binding factor 1            | 2.2E-05  | 85.75221 |
| AHR       | 196 aromatic hydrocarbon receptor                            | 2.31E-05 | 85.57522 |
| FLJ12859  | 23528 ZNP-99 transcription factor                            | 2.43E-05 | 85.39823 |
| ESA1      | 10524 cPLA2 interacting protein                              | 2.44E-05 | 85.22124 |
| PLZF      | 7704 zinc finger protein 145 (Kruppel-like)                  | 2.74E-05 | 85.04425 |
| CLOCK     | 9575 clock homolog (mouse)                                   | 2.77E-05 | 84.86726 |
| DKFZp547C | 25970 SH2B adaptor protein 1                                 | 2.82E-05 | 84.69027 |
| E2F-4     | 1874 E2F transcription factor 4                              | 2.91E-05 | 84.51327 |
| MYD88     | 4615 myeloid differentiation primary response gene 88        | 2.97E-05 | 84.33628 |
| FLJ10671  | 8295 350/400 kDa PCAF-associated factor                      | 3.01E-05 | 84.15929 |
| CDC25     | 5923 Ras-specific nucleotide exchange factor CDC25           | 3.19E-05 | 83.9823  |
| MGC11098  | 6622 non A4 component of amyloid                             | 3.21E-05 | 83.80531 |

|             |        |                                                                 |          |          |
|-------------|--------|-----------------------------------------------------------------|----------|----------|
| POMP100     | 6421   | polypyrimidine tract-binding protein-associated splicing factor | 3.26E-05 | 83.62832 |
| EGFR        | 1956   | cell growth inhibiting protein 40                               | 3.26E-05 | 83.45133 |
| MGC13177    | 5970   | v-rel avian reticuloendotheliosis viral oncogene                | 3.4E-05  | 83.27434 |
| FLJ20819    | 7879   | Ras-associated protein RAB7                                     | 3.43E-05 | 83.09735 |
| MGC11121    | 4831   | non-metastatic cells 2, protein (NM23) expressed in             | 3.45E-05 | 82.92035 |
| CSBP        | 3190   | transformation upregulated nuclear protein                      | 3.8E-05  | 82.74336 |
| CDC18L      | 990    | CDC18 (cell division cycle 18, S.pombe, homolog)-like           | 3.92E-05 | 82.56637 |
| NGR         | 65078  | Nogo-66 receptor                                                | 4.11E-05 | 82.38938 |
| RRAS        | 6237   | Oncogene RRAS                                                   | 4.18E-05 | 82.21239 |
| FLJ25596    | 6655   | son of sevenless homolog 2                                      | 4.23E-05 | 81.9469  |
| GF1         | 6654   | son of sevenless homolog 1                                      | 4.23E-05 | 81.9469  |
| BAF170      | 6601   | SWI3-like protein                                               | 4.32E-05 | 81.68142 |
| BSP1        | 4086   | MAD, mothers against decapentaplegic homolog 1                  | 4.34E-05 | 81.50442 |
| BCL3        | 602    | B-cell leukemia/lymphoma 3                                      | 4.37E-05 | 81.32743 |
| C/EBP-alpha | 1050   | CCAAT/enhancer binding protein alpha                            | 4.41E-05 | 81.15044 |
| ELK3        | 2004   | SRF accessory protein 2                                         | 4.53E-05 | 80.97345 |
| VAV2        | 7410   | Protein vav-2                                                   | 4.65E-05 | 80.79646 |
| ASCL2       | 430    | achaete-scute complex-like 2                                    | 4.82E-05 | 80.61947 |
| ARNTL       | 406    | basic-helix-loop-helix-PAS orphan MOP3                          | 4.84E-05 | 80.44248 |
| MYL         | 5371   | promyelocytic leukemia, inducer of                              | 4.99E-05 | 80.26549 |
| NR111       | 7421   | vitamin D (1,25-dihydroxyvitamin D3) receptor                   | 5.16E-05 | 80.0885  |
| H-ICSBP     | 3394   | interferon consensus sequence binding protein 1                 | 5.39E-05 | 79.9115  |
| PAK2        | 5062   | p21-activated kinase 2                                          | 5.47E-05 | 79.73451 |
| EZF         | 9314   | endothelial Kruppel-like zinc finger protein                    | 5.56E-05 | 79.55752 |
| MSI1        | 4440   | Musashi (Drosophila) homolog 1                                  | 5.61E-05 | 79.38053 |
| PIM         | 5292   | Oncogene PIM1                                                   | 5.7E-05  | 79.20354 |
| DPC4        | 4089   | mothers against decapentaplegic homolog 4                       | 5.81E-05 | 79.02655 |
| CD227       | 4582   | polymorphic epithelial mucin                                    | 5.82E-05 | 78.84956 |
| ERYF1       | 2623   | NF-E1 DNA-binding protein                                       | 5.87E-05 | 78.67257 |
| DFNB24      | 5962   | deafness, autosomal recessive 24                                | 5.87E-05 | 78.49558 |
| FLJ44809    | 2475   | FKBP12-rapamycin complex-associated protein 1                   | 5.97E-05 | 78.31858 |
| HD3         | 8841   | histone deacetylase 3                                           | 6.06E-05 | 78.14159 |
| SREBF1      | 6720   | sterol regulatory element binding transcription factor 1        | 6.12E-05 | 77.9646  |
| ANCR        | 7337   | ubiquitin protein ligase E3A                                    | 6.2E-05  | 77.78761 |
| CD281       | 7096   | Toll/interleukin-1 receptor-like                                | 6.25E-05 | 77.61062 |
| HNRNPU      | 3192   | heterogeneous nuclear ribonucleoprotein U                       | 6.28E-05 | 77.43363 |
| AUF1        | 3184   | heterogeneous nuclear ribonucleoprotein D                       | 6.35E-05 | 77.25664 |
| C1QA        | 712    | complement component C1q, A chain                               | 6.41E-05 | 76.90265 |
| C1QB        | 713    | complement component 1, q subcomponent,                         | 6.41E-05 | 76.90265 |
| C1Q-C       | 714    | complement component 1, q subcomponent, C chain                 | 6.41E-05 | 76.90265 |
| FLJ16691    | 5829   | paxillin                                                        | 6.53E-05 | 76.54867 |
| FARP2       | 9855   | FGD1-related Cdc42-GEF                                          | 6.59E-05 | 76.28319 |
| FLJ41865    | 26230  | T-cell lymphoma invasion and metastasis 2                       | 6.59E-05 | 76.28319 |
| HDAC2       | 3066   | YY1-associated factor 1                                         | 6.68E-05 | 76.0177  |
| GEFT        | 115557 | RAC/CDC42 exchange factor                                       | 6.72E-05 | 75.84071 |
| DKFZp781f   | 5924   | Ras protein-specific guanine nucleotide-releasing factor        | 6.75E-05 | 75.57522 |
| GLUH1       | 2890   | glutamate receptor, ionotropic, AMPA 1                          | 6.75E-05 | 75.57522 |

|           |                                                             |          |          |
|-----------|-------------------------------------------------------------|----------|----------|
| ERBB4     | 2066 v-erb-a erythroblastic leukemia viral oncogene         | 6.86E-05 | 75.30973 |
| AWD       | 4830 NDP kinase A                                           | 6.94E-05 | 75.13274 |
| AT-V1     | 4683 p95 protein of the MRE11/RAD50 complex                 | 6.96E-05 | 74.86726 |
| H2A.X     | 3014 H2AX histone                                           | 6.96E-05 | 74.86726 |
| ARF-BP1   | 10075 ARF binding protein 1                                 | 7.13E-05 | 74.60177 |
| KIAA1515  | 57646 ubiquitin specific protease 28                        | 7.21E-05 | 74.42478 |
| AKT2      | 208 v-akt murine thymoma viral oncogene homolog 2           | 7.32E-05 | 74.24779 |
| C21       | 79718 transducin (beta)-like 1X-linked receptor 1           | 7.38E-05 | 74.0708  |
| DVL2      | 1856 dishevelled 2                                          | 7.43E-05 | 73.89381 |
| DKFZp586N | 4088 mad homolog JV15-2                                     | 7.48E-05 | 73.71681 |
| AFBP      | 3484 amniotic fluid binding protein                         | 7.5E-05  | 73.53982 |
| FKBP38    | 23770 FK506 binding protein 8, 38kDa                        | 7.5E-05  | 73.36283 |
| E2F-6     | 1876 E2F transcription factor 6, isoform 1                  | 7.56E-05 | 73.18584 |
| DKFZp547J | 1995 Hu antigen C                                           | 7.65E-05 | 73.00885 |
| CK2A1     | 1457 casein kinase II alpha subunit                         | 7.8E-05  | 72.74336 |
| CK2A2     | 1459 casein kinase 2, alpha prime polypeptide               | 7.8E-05  | 72.74336 |
| Cmyb      | 4602 c-myb13A_CDS                                           | 7.84E-05 | 72.47788 |
| GIG34     | 6135 60S ribosomal protein L11                              | 8.34E-05 | 72.30088 |
| MIZ-1     | 7709 zinc finger protein 151 (pHZ-67)                       | 8.54E-05 | 72.12389 |
| BAPX2     | 4824 NK3 homeobox 1                                         | 8.59E-05 | 71.9469  |
| ARHGEF14  | 23263 MCF2 transforming sequence-like protein               | 8.97E-05 | 71.76991 |
| ELK1      | 2002 ELK1 protein                                           | 9.05E-05 | 71.59292 |
| EAP1      | 9232 ESP1-associated protein 1                              | 9.71E-05 | 71.41593 |
| APLP      | 333 amyloid-like protein 1                                  | 9.82E-05 | 71.23894 |
| CDK4I     | 1030 cyclin-dependent kinases 4 and 6 binding protein       | 9.86E-05 | 70.97345 |
| MAD2      | 4601 Max-related transcription factor                       | 9.86E-05 | 70.97345 |
| APRF      | 6774 DNA-binding protein APRF                               | 0.000103 | 70.70796 |
| DDX9      | 1660 DEAD/H box-9 (nuclear DNA helicase II; RNA helicase A) | 0.000106 | 70.53097 |
| BAG-6     | 7917 scythe                                                 | 0.000106 | 70.35398 |
| ERBB2IP   | 55914 ERBB2 interacting protein                             | 0.000115 | 70.17699 |
| ARR3      | 407 cone arrestin                                           | 0.00012  | 70       |
| BBC3      | 27113 BCL2 binding component 3                              | 0.000122 | 69.82301 |
| BID       | 637 BID isoform Si6                                         | 0.000123 | 69.64602 |
| FKHL16    | 2305 Forkhead, drosophila, homolog-like 16                  | 0.000124 | 69.46903 |
| FASPS     | 8864 period circadian protein 2                             | 0.000124 | 69.29204 |
| BAM       | 10018 bcl-2 interacting protein Bim                         | 0.000125 | 69.11504 |
| ARF6      | 382 ADP-ribosylation factor 6                               | 0.000131 | 68.93805 |
| CHNG1     | 7253 thyroid stimulating hormone receptor                   | 0.000132 | 68.76106 |
| NOV       | 5361 plexin 1                                               | 0.000138 | 68.58407 |
| C1        | 3183 heterogeneous nuclear ribonucleoprotein C (C1/C2)      | 0.000139 | 68.40708 |
| CLGI      | 7076 fibroblast collagenase inhibitor                       | 0.00014  | 68.23009 |
| DTR       | 1839 heparin-binding epidermal growth factor                | 0.000143 | 68.0531  |
| ERK       | 5594 protein tyrosine kinase ERK2                           | 0.000149 | 67.78761 |
| ERK1      | 5595 extracellular signal-regulated kinase 1                | 0.000149 | 67.78761 |
| DUET      | 8997 serine/threonine kinase with Dbl- and pleckstrin       | 0.000154 | 67.52212 |
| GIG8      | 3398 cell growth-inhibiting gene 8                          | 0.000158 | 67.34513 |
| CKBBP2    | 90480 papillomavirus L2 interacting nuclear protein 1       | 0.000163 | 67.16814 |

|            |                                                                        |          |          |
|------------|------------------------------------------------------------------------|----------|----------|
| MGC12953   | 6097 nuclear receptor ROR-gamma                                        | 0.000163 | 66.99115 |
| CINC-2a    | 2920 chemokine (C-X-C motif) ligand 2                                  | 0.000164 | 66.81416 |
| CD309      | 3791 vascular endothelial growth factor receptor 2                     | 0.000171 | 66.63717 |
| 60B8AG     | 6279 cystic fibrosis antigen                                           | 0.000171 | 66.46018 |
| IRF3       | 3661 interferon regulatory factor 3                                    | 0.000172 | 66.28319 |
| ADRBK1     | 156 beta adrenergic receptor kinase 1                                  | 0.000179 | 66.10619 |
| CD221      | 3480 insulin-like growth factor 1 receptor                             | 0.000183 | 65.84071 |
| FOG        | 161882 friend of GATA-1                                                | 0.000183 | 65.84071 |
| BLIMP1     | 639 beta-interferon gene positive-regulatory domain I                  | 0.000184 | 65.57522 |
| ACVRLK3    | 657 bone morphogenetic protein receptor, type IA                       | 0.000187 | 65.39823 |
| CRES       | 10047 cystatin-related epididymal spermatogenic protein                | 0.000191 | 65.13274 |
| NEC2       | 5126 subtilisin-like prohormone convertases                            | 0.000191 | 65.13274 |
| ALK-6      | 658 bone morphogenetic protein receptor, type IB                       | 0.000194 | 64.86726 |
| MGC11118   | 5645 trypsin 2                                                         | 0.000195 | 64.51327 |
| MGC12017   | 5644 nonfunctional trypsin 1                                           | 0.000195 | 64.51327 |
| MTG        | 5646 trypsin 3                                                         | 0.000195 | 64.51327 |
| KCIP-1     | 7534 phospholipase A2                                                  | 0.000197 | 64.15929 |
| ARHGEF2    | 9181 rho/rac guanine nucleotide exchange factor (GEF) 2                | 0.000198 | 63.9823  |
| CD130      | 3572 CD130 antigen                                                     | 0.0002   | 63.80531 |
| INSRR      | 3645 IR-related receptor                                               | 0.000203 | 63.62832 |
| GP145-TrkI | 4915 neurotrophic tyrosine kinase, receptor, type 2                    | 0.000203 | 63.45133 |
| DOCK7      | 85440 dedicator of cytokinesis 7                                       | 0.000204 | 63.27434 |
| MGC33401   | 7073 TIA1 cytotoxic granule-associated RNA-binding protein             | 0.000209 | 63.09735 |
| ABD-B      | 3205 homeo box A9                                                      | 0.000211 | 62.92035 |
| AG2S       | 185 angiotensin receptor 1B                                            | 0.000212 | 62.74336 |
| NF-E2      | 4778 nuclear factor (erythroid-derived 2), 45kDa                       | 0.000214 | 62.56637 |
| MTA1       | 9112 metastasis associated protein                                     | 0.000219 | 62.38938 |
| DBL        | 4168 Oncogene MCF2 (oncogene DBL)                                      | 0.000223 | 62.21239 |
| VASP       | 7408 vasodilator-stimulated phosphoprotein                             | 0.000226 | 62.0354  |
| CDC42      | 998 cell division cycle 42                                             | 0.000242 | 61.85841 |
| GNG1       | 2792 guanine nucleotide binding protein (G protein), gamma transducing | 0.000243 | 61.68142 |
| JNK-55     | 5601 c-Jun kinase 2                                                    | 0.000248 | 61.50442 |
| BOS3       | 6495 SIX homeobox 1                                                    | 0.000258 | 61.32743 |
| FLT        | 2321 vascular endothelial growth factor                                | 0.000258 | 61.15044 |
| CD29       | 3688 integrin beta 1                                                   | 0.00026  | 60.97345 |
| GNA12      | 2768 guanine nucleotide binding protein (G protein) alpha 12           | 0.000262 | 60.79646 |
| CP107      | 5933 retinoblastoma-like 1 (p107)                                      | 0.000264 | 60.61947 |
| CD120a     | 7132 tumor necrosis factor receptor type 1                             | 0.000264 | 60.44248 |
| MGC70609   | 7422 vascular permeability factor                                      | 0.000268 | 60.26549 |
| ARHGAP5    | 394 p100 RasGAP-associated p105 protein                                | 0.000273 | 60.0885  |
| AMPK       | 5563 AMP-activated protein kinase alpha 2 catalytic subunit            | 0.00028  | 59.82301 |
| AMPK       | 5562 AMPK alpha 1                                                      | 0.00028  | 59.82301 |
| JNK        | 5599 stress-activated protein kinase JNK1                              | 0.000282 | 59.55752 |
| CED-12     | 9844 engulfment and cell motility 1                                    | 0.000282 | 59.20354 |
| DOCK1      | 1793 dedicator of cyto-kinesis 1                                       | 0.000282 | 59.20354 |
| DOCK2      | 1794 dedicator of cytokinesis 2                                        | 0.000282 | 59.20354 |
| BETA-TRCP  | 8945 beta-TrCP1                                                        | 0.000284 | 58.84956 |

|            |                                                                      |          |          |
|------------|----------------------------------------------------------------------|----------|----------|
| FKLF       | 8462 Kruppel-like factor 11                                          | 0.000284 | 58.67257 |
| FLJ16302   | 4855 Notch homolog 4 (Drosophila)                                    | 0.000295 | 58.49558 |
| DVL3       | 1857 dishevelled 3                                                   | 0.000296 | 58.31858 |
| MAX        | 4149 MAX protein                                                     | 0.000307 | 58.14159 |
| C-Rel      | 5966 v-rel reticuloendotheliosis viral oncogene homolog              | 0.000322 | 57.9646  |
| ARHG       | 391 ras homolog gene family, member G (rho G)                        | 0.000323 | 57.61062 |
| DOCK4      | 9732 dedicator of cytokinesis 4                                      | 0.000323 | 57.61062 |
| GDS1       | 5910 RAP1, GTP-GDP dissociation stimulator 1                         | 0.000323 | 57.61062 |
| MKNK1      | 8569 MAP kinase interacting serine/threonine kinase 1                | 0.000324 | 57.25664 |
| ARHGEF7    | 8874 rho guanine nucleotide exchange factor 7                        | 0.000338 | 57.07965 |
| ALPS1A     | 355 Fas (TNF receptor superfamily, member 6)                         | 0.00034  | 56.90265 |
| KIAA1907   | 3911 laminin alpha-5 chain                                           | 0.000341 | 56.72566 |
| APRO6      | 10140 transducer of ERBB2, 1                                         | 0.000343 | 56.54867 |
| CTS02      | 1513 cathepsin K                                                     | 0.00035  | 56.37168 |
| DELTA1     | 28514 delta-like 1                                                   | 0.000357 | 56.19469 |
| GPRC1E     | 2915 glutamate receptor, metabotropic 5                              | 0.000361 | 56.0177  |
| CRS2       | 4488 msh homeobox 2                                                  | 0.000388 | 55.84071 |
| HIF-1alpha | 3091 member of PAS superfamily 1                                     | 0.000388 | 55.66372 |
| D6S182     | 3326 heat shock 90kDa protein 1, beta                                | 0.000388 | 55.48673 |
| ANF        | 8820 homeobox, ES cell expressed 1                                   | 0.000405 | 55.30973 |
| MODED      | 4613 neuroblastoma-derived v-myc avian myelocytomatosis              | 0.000408 | 55.13274 |
| CALNB1     | 5534 protein phosphatase 3, regulatory subunit B                     | 0.000408 | 54.86726 |
| PPP3R2     | 5535 protein phosphatase 3, regulatory subunit B                     | 0.000408 | 54.86726 |
| CD295      | 3953 leptin receptor                                                 | 0.00041  | 54.51327 |
| FLJ94114   | 3952 obesity factor                                                  | 0.00041  | 54.51327 |
| ARNO       | 9266 cytohesin 2                                                     | 0.000414 | 54.24779 |
| 156DAG     | 1605 dystrophin-associated glycoprotein-1                            | 0.000423 | 54.0708  |
| CTCF       | 10664 CTCFL paralog                                                  | 0.000425 | 53.89381 |
| 2-Oct      | 5452 POU domain, class 2, transcription factor 2                     | 0.000427 | 53.71681 |
| ITSN       | 6453 intersectin short variant 12                                    | 0.000443 | 53.53982 |
| ESP1       | 9700 extra spindle poles like 1                                      | 0.000444 | 53.27434 |
| FLJ25655   | 5885 nuclear matrix protein 1                                        | 0.000444 | 53.27434 |
| HsCYK-4    | 29127 GTPase activating protein                                      | 0.000451 | 53.00885 |
| CSNBAD3    | 2779 transducin alpha-1 chain                                        | 0.000451 | 52.74336 |
| DKFZp686C  | 5148 rod cG-PDE G                                                    | 0.000451 | 52.74336 |
| CADASIL    | 4854 Notch homolog 3 (Drosophila)                                    | 0.000454 | 52.47788 |
| ECK        | 1969 protein tyrosine kinase                                         | 0.000456 | 52.30088 |
| AR1        | 6942 stromelysin-1 platelet-derived growth factor-responsive element | 0.000456 | 52.12389 |
| CLG4B      | 4318 gelatinase B                                                    | 0.000457 | 51.9469  |
| CD126      | 3570 interleukin 6 receptor alpha subunit                            | 0.000471 | 51.76991 |
| APKD2      | 5311 polycystic kidney disease 2 (autosomal dominant)                | 0.000496 | 51.59292 |
| ARID1A     | 8289 SWI/SNF related, matrix associated                              | 0.000498 | 51.41593 |
| ARNO3      | 9265 general receptor of phosphoinositides 1                         | 0.000505 | 51.23894 |
| CIG        | 2335 fibronectin 1                                                   | 0.000506 | 51.06195 |
| CD11C      | 3687 myeloid membrane antigen, alpha subunit                         | 0.000518 | 50.70796 |
| CD18       | 3689 complement receptor C3 beta-subunit                             | 0.000518 | 50.70796 |
| FGA        | 2243 fibrinogen, alpha polypeptide                                   | 0.000518 | 50.70796 |

|          |                                                                    |          |          |
|----------|--------------------------------------------------------------------|----------|----------|
| DMP1     | 9988 cyclin D binding myb-like transcription factor 1              | 0.000521 | 50.35398 |
| BSF2     | 3569 interleukin 6                                                 | 0.000524 | 50.17699 |
| KIAA1119 | 4645 myosin VB                                                     | 0.000525 | 50       |
| CD344    | 8322 WNT receptor frizzled-4                                       | 0.000536 | 49.82301 |
| APRIL    | 8741 tumor necrosis factor-related death ligand-1                  | 0.000537 | 49.64602 |
| BCL10    | 8915 CARD-like apoptotic protein                                   | 0.00054  | 49.46903 |
| 60B8AG   | 6280 calgranulin B                                                 | 0.00055  | 49.29204 |
| GCN5     | 2648 GCN5 general control of amino-acid synthesis 5-like 2         | 0.000556 | 49.11504 |
| CCL7     | 6354 chemokine (C-C motif) ligand 7                                | 0.00057  | 48.93805 |
| CCR1     | 1230 chemokine (C-C motif) receptor 1                              | 0.00058  | 48.76106 |
| MST155   | 51429 SH3 and PX domain-containing protein SH3PX1                  | 0.00058  | 48.58407 |
| ELN      | 2006 tropoelastin                                                  | 0.000581 | 48.40708 |
| CSK      | 1445 c-src tyrosine kinase                                         | 0.000595 | 48.23009 |
| ACTA     | 58 alpha skeletal muscle actin                                     | 0.0006   | 48.0531  |
| ABC-1    | 19 ATP binding cassette transporter 1                              | 0.000602 | 47.78761 |
| GIF      | 4282 phenylpyruvate tautomerase                                    | 0.000602 | 47.78761 |
| ACTC     | 70 cardiac muscle alpha actin 1                                    | 0.000604 | 47.34513 |
| CMD2A    | 7137 troponin I type 3 (cardiac)                                   | 0.000604 | 47.34513 |
| MGC12565 | 5581 protein kinase C, epsilon                                     | 0.000604 | 47.34513 |
| CMD1G    | 7273 titin                                                         | 0.000607 | 46.99115 |
| CC-CKR-2 | 1231 monocyte chemoattractant protein 1 receptor                   | 0.000624 | 46.81416 |
| PTPN2    | 5771 T-cell protein tyrosine phosphatase                           | 0.000625 | 46.63717 |
| GIOT-1   | 92283 zinc finger protein 461                                      | 0.000632 | 46.46018 |
| BOB1     | 5450 POU class 2 associating factor 1                              | 0.000647 | 46.28319 |
| NMI      | 9111 N-myc-interactor                                              | 0.000652 | 46.10619 |
| ACTRIIB  | 93 activin A type IIB receptor                                     | 0.000663 | 45.9292  |
| ANCCA    | 29028 ATPase family, AAA domain containing 2                       | 0.000665 | 45.75221 |
| GRB1     | 5295 phosphoinositide-3-kinase, regulatory subunit                 | 0.000669 | 45.48673 |
| P85B     | 5296 phosphoinositide-3-kinase, regulatory subunit 2               | 0.000669 | 45.48673 |
| ASP2     | 23621 memapsin-2                                                   | 0.000681 | 45.22124 |
| SREBF2   | 6721 sterol regulatory element-binding protein 2                   | 0.000682 | 45.04425 |
| CD51     | 3685 integrin alpha-V                                              | 0.000766 | 44.86726 |
| FLJ94509 | 2672 zinc finger protein 163                                       | 0.000815 | 44.69027 |
| CCNB     | 891 G2/mitotic-specific cyclin B1                                  | 0.000834 | 44.51327 |
| CRK      | 1398 v-crck sarcoma virus CT10 oncogene homolog                    | 0.000846 | 44.33628 |
| ARNT     | 405 dioxin receptor, nuclear translocator                          | 0.000848 | 44.15929 |
| BAF190   | 6595 SWI/SNF-related matrix-associated actin-dependent             | 0.000862 | 43.9823  |
| ASEF2    | 221178 adenomatous polyposis coli stimulated exchange factor 2     | 0.000885 | 43.80531 |
| KIAA0407 | 5364 plexin B1                                                     | 0.000888 | 43.62832 |
| ARHGEF4  | 50649 Rho guanine nucleotide exchange factor 4                     | 0.000894 | 43.45133 |
| BCAR1    | 9564 Cas scaffolding protein family member 1                       | 0.000901 | 43.27434 |
| B2T      | 3918 laminin, gamma 2 (nicein (100kD), kalinin (105kD), BM600 (100 | 0.000983 | 43.09735 |
| CUL4B    | 8450 cullin-4B                                                     | 0.001034 | 42.92035 |
| PTP-PEST | 5782 protein-tyrosine phosphatase G1                               | 0.001036 | 42.74336 |
| CD124    | 3566 interleukin-4 receptor alpha chain                            | 0.00106  | 42.47788 |
| CD132    | 3561 common cytokine receptor gamma chain                          | 0.00106  | 42.47788 |
| ASIP     | 56288 atypical PKC isotype-specific interacting protein            | 0.001086 | 42.21239 |

|           |                                                            |          |          |
|-----------|------------------------------------------------------------|----------|----------|
| CXCL12    | 6387 chemokine (C-X-C motif) ligand 12                     | 0.001141 | 42.0354  |
| FLJ22252  | 64321 SRY (sex determining region Y)-box 17                | 0.001158 | 41.85841 |
| ERBB3     | 2065 v-erb-b2 avian erythroblastic leukemia viral oncogene | 0.001191 | 41.68142 |
| CFND      | 1947 ephrin-B1                                             | 0.001219 | 41.50442 |
| B56A      | 5525 serine/threonine protein phosphatase 2A               | 0.001227 | 41.32743 |
| CDCD1     | 4000 limb girdle muscular dystrophy 1B                     | 0.001245 | 41.15044 |
| ECP54     | 8607 RuvB (E coli homolog)-like 1                          | 0.001254 | 40.97345 |
| ACVRL1    | 94 activin A receptor, type II-like kinase 1               | 0.001265 | 40.79646 |
| FLJ97193  | 10023 proto-oncogene FRAT1                                 | 0.001268 | 40.61947 |
| GSC       | 145258 goosecoid                                           | 0.001285 | 40.44248 |
| CCL2      | 6347 small inducible cytokine A2                           | 0.001294 | 40       |
| CCL3      | 6348 small inducible cytokine A3 (homologous to mouse )    | 0.001294 | 40       |
| CCL3L1    | 6349 chemokine (C-C motif) ligand 3-like 1                 | 0.001294 | 40       |
| CCL3L3    | 414062 small inducible cytokine A3-like 1                  | 0.001294 | 40       |
| CBBM      | 5956 opsin 1 (cone pigments), long-wave-sensitive          | 0.0013   | 39.55752 |
| H2A.z     | 3015 H2AZ histone                                          | 0.001311 | 39.38053 |
| BCGF-1    | 3565 B cell growth factor 1                                | 0.00132  | 39.20354 |
| DNMT3A    | 1788 DNA (cytosine-5-)-methyltransferase 3 alpha           | 0.001324 | 39.02655 |
| ADAM33    | 80332 a disintegrin and metalloprotease 33                 | 0.001368 | 38.84956 |
| AXIL      | 8313 axin 2                                                | 0.001394 | 38.58407 |
| AXIN      | 8312 axin 1                                                | 0.001394 | 38.58407 |
| LUN       | 10210 topoisomerase I binding, arginine/serine-rich        | 0.001419 | 38.31858 |
| HXB       | 3371 tenascin C                                            | 0.001446 | 38.14159 |
| TGFBRAP1  | 9392 TGF beta receptor associated protein -1               | 0.001497 | 37.9646  |
| BMP2      | 650 bone morphogenetic protein 2                           | 0.001506 | 37.69912 |
| COL1A1    | 1277 alpha 1 type I collagen                               | 0.001506 | 37.69912 |
| 14-3-3    | 10971 14-3-3 protein T-cell                                | 0.001512 | 37.43363 |
| 2-5-3p    | 23265 exocyst complex component 7                          | 0.001529 | 37.25664 |
| ICK       | 22858 MAK-related kinase                                   | 0.001538 | 37.07965 |
| DKFZp781F | 80314 enhancer of polycomb 1                               | 0.001558 | 36.90265 |
| FCER1G    | 2207 Fc fragment of IgE, high affinity I, receptor         | 0.00157  | 36.72566 |
| TLR7      | 51284 toll-like receptor 7                                 | 0.00168  | 36.54867 |
| ACVRIP1   | 9863 membrane associated guanylate kinase, WW and PDZ      | 0.001745 | 36.37168 |
| AGER      | 177 advanced glycosylation end product-specific receptor   | 0.001781 | 36.19469 |
| ACC-4     | 1512 cathepsin H                                           | 0.001785 | 36.0177  |
| GNA-11    | 2767 guanine nucleotide-binding protein, Gq class, GNA11   | 0.001796 | 35.84071 |
| IBP5      | 3488 insulin-like growth factor binding protein 5          | 0.001862 | 35.66372 |
| ACVR1C    | 130399 activin receptor-like kinase 7                      | 0.001865 | 35.48673 |
| ACAN      | 176 large aggregating proteoglycan                         | 0.001878 | 35.30973 |
| CAPRIN1   | 4076 membrane component chromosome 11 surface marker 1     | 0.001926 | 35.13274 |
| ALPS2     | 843 caspase 10                                             | 0.001937 | 34.95575 |
| CTSS      | 1520 cathepsin S                                           | 0.001958 | 34.77876 |
| HGS       | 9146 hepatocyte growth factor-regulated tyrosine kinase    | 0.001958 | 34.60177 |
| MBP       | 4155 myelin basic protein                                  | 0.002017 | 34.42478 |
| CCL5      | 6352 T-cell specific RANTES protein                        | 0.002112 | 34.24779 |
| ON        | 6678 secreted protein, acidic, cysteine-rich               | 0.002114 | 34.0708  |
| AMY-1     | 26292 associate of myc-1                                   | 0.002151 | 33.89381 |

|           |                                                                   |          |          |
|-----------|-------------------------------------------------------------------|----------|----------|
| ACTN2     | 88 F-actin cross-linking protein                                  | 0.002227 | 33.71681 |
| ADAP1     | 11033 centaurin-alpha                                             | 0.002243 | 33.53982 |
| AGS2      | 4853 Notch homolog 2 (Drosophila)                                 | 0.002307 | 33.36283 |
| FLJ12850  | 57650 KIAA1524                                                    | 0.002327 | 33.18584 |
| AR-JP     | 5071 parkin                                                       | 0.002365 | 33.00885 |
| RNF81     | 6737 Sjogren syndrome antigen A1 (52kDa, ribonucleoprotein autoa  | 0.002388 | 32.83186 |
| ATOD4     | 9021 suppressor of cytokine signaling 3                           | 0.002553 | 32.65487 |
| FLJ20922  | 5900 ral guanine nucleotide dissociation stimulator               | 0.00257  | 32.47788 |
| CLASPIN   | 63967 claspin                                                     | 0.002587 | 32.30088 |
| ACPA      | 5657 proteinase 3 (serine proteinase, neutrophil)                 | 0.002691 | 32.12389 |
| CSNK1E    | 1454 casein kinase 1 epsilon                                      | 0.002906 | 31.9469  |
| CASP14    | 23581 caspase 14                                                  | 0.003023 | 31.76991 |
| APAF-3    | 842 caspase 9, apoptosis-related cysteine protease                | 0.003027 | 31.59292 |
| COL4A3    | 1285 alpha 3 type IV collagen                                     | 0.003088 | 31.41593 |
| EMC19     | 6500 transcription elongation factor B (SIII), polypeptide 1-like | 0.003094 | 31.23894 |
| DKFZp779N | 5340 plasminogen                                                  | 0.003118 | 31.06195 |
| GDF8      | 2660 myostatin                                                    | 0.00317  | 30.88496 |
| BAPX1     | 579 bagpipe homeobox 1                                            | 0.003201 | 30.70796 |
| CDCA7L    | 55536 transcription factor RAM2                                   | 0.003277 | 30.44248 |
| CDK8      | 1024 CDK8 protein kinase                                          | 0.003277 | 30.44248 |
| ASD3      | 4624 myosin heavy chain, cardiac muscle alpha isoform             | 0.003309 | 30.17699 |
| BM600     | 3909 epiligrin alpha 3 subunit                                    | 0.003385 | 30       |
| APBB1     | 322 amyloid beta (A4) precursor protein-binding, family B         | 0.003392 | 29.82301 |
| CNBP      | 7555 zinc finger protein 9 (a cellular retroviral nucleic acid )  | 0.003395 | 29.64602 |
| DKFZp781F | 5325 PLAG-like 1                                                  | 0.003403 | 29.46903 |
| DKFZp686L | 7342 upstream binding protein 1 (LBP-1a)                          | 0.003475 | 29.29204 |
| ARA24     | 5901 ras-related nuclear protein                                  | 0.003544 | 29.02655 |
| CHC1      | 1104 regulator of chromosome condensation 1                       | 0.003544 | 29.02655 |
| DKFZp686J | 4763 neurofibromin                                                | 0.003675 | 28.76106 |
| CD36      | 948 scavenger receptor class B, member 3                          | 0.003681 | 28.58407 |
| CD63      | 967 CD63 antigen (melanoma 1 antigen)                             | 0.00378  | 28.40708 |
| HOX7      | 4487 msh homeobox 1                                               | 0.003829 | 28.23009 |
| ARFGEP10C | 9922 IQ motif and Sec7 domain 1                                   | 0.003837 | 28.0531  |
| CARD12    | 58484 caspase recruitment domain family, member 12                | 0.003867 | 27.87611 |
| DKFZp762F | 55662 hypoxia-inducible factor 1, alpha subunit inhibitor         | 0.00389  | 27.69912 |
| BAZ1B     | 9031 Williams-Beuren syndrome chromosome region 10                | 0.004055 | 27.52212 |
| CLPS      | 1208 pancreatic colipase preproprotein                            | 0.004085 | 27.34513 |
| CD2AP     | 23607 CD2-associated protein                                      | 0.004142 | 27.16814 |
| DLL4      | 54567 notch ligand DLL4                                           | 0.004146 | 26.99115 |
| BSF3      | 23529 B-cell stimulating factor 3                                 | 0.004211 | 26.81416 |
| PI5       | 5268 serpin peptidase inhibitor, clade B (ovalbumin)              | 0.004265 | 26.63717 |
| A-FABP    | 2167 fatty acid binding protein 4, adipocyte                      | 0.004294 | 26.46018 |
| BMP-11    | 10220 growth differentiation factor 11                            | 0.004297 | 26.19469 |
| EDF       | 3624 inhibin, beta A (activin A, activin AB alpha polypeptide)    | 0.004297 | 26.19469 |
| DKFZp686J | 57496 myocardin-related transcription factor B                    | 0.004334 | 25.9292  |
| GAB2      | 9846 GRB2-associated binding protein 2                            | 0.004352 | 25.75221 |
| CAP       | 10580 sorbin and SH3 domain containing 1                          | 0.004353 | 25.57522 |



|           |                                                          |          |          |
|-----------|----------------------------------------------------------|----------|----------|
| AVPR1     | 552 arginine vasopressin receptor 1A                     | 0.004402 | 25.39823 |
| FADD      | 8772 Fas-associating death domain-containing protein     | 0.004573 | 25.22124 |
| ERRL1     | 133522 peroxisome proliferator-activated receptor gamma  | 0.004612 | 25.04425 |
| MGC:3978i | 7188 RING finger protein 84                              | 0.00482  | 24.86726 |
| ATX1      | 6310 ataxin 1                                            | 0.005131 | 24.69027 |
| BAT8      | 10919 euchromatic histone-lysine N-methyltransferase 2   | 0.005168 | 24.33628 |
| HSP70-1   | 3303 heat shock-induced protein                          | 0.005168 | 24.33628 |
| HSP70-1B  | 3304 heat shock 70kD protein 1B                          | 0.005168 | 24.33628 |
| CSCD      | 1634 small leucine-rich protein 1B                       | 0.005412 | 23.9823  |
| APT1LG1   | 356 tumor necrosis factor (ligand) superfamily, member 6 | 0.005515 | 23.80531 |
| MGC21659  | 7069 spot 14 protein                                     | 0.005659 | 23.62832 |
| KIAA1303  | 57521 regulatory associated protein of mTOR              | 0.005698 | 23.45133 |
| CCL24     | 6369 eotaxin-2                                           | 0.005706 | 23.27434 |
| ARVD      | 7043 transforming growth factor, beta 3                  | 0.005729 | 23.09735 |
| CD113     | 25945 poliovirus receptor-related 3                      | 0.005733 | 22.83186 |
| MGC16699  | 5797 protein tyrosine phosphatase, receptor type         | 0.005733 | 22.83186 |
| MAD7      | 6945 transcription factor-like 4                         | 0.005754 | 22.56637 |
| AFP       | 174 alpha-1-fetoprotein                                  | 0.005931 | 22.38938 |
| DKFZp686C | 8848 transforming growth factor beta-stimulated protein  | 0.00598  | 22.21239 |
| CDX1      | 1044 caudal type homeobox transcription factor 1         | 0.006058 | 21.76991 |
| ERF       | 2077 Ets2 repressor factor                               | 0.006058 | 21.76991 |
| EST01027  | 10628 thioredoxin interacting protein                    | 0.006058 | 21.76991 |
| HHO.C10   | 3215 homeo box B5                                        | 0.006058 | 21.76991 |
| CCT-alpha | 6950 T-complex protein 1, alpha subunit                  | 0.006185 | 21.32743 |
| CRC18     | 1630 deleted in colorectal cancer protein                | 0.006232 | 21.15044 |
| KIAA0283  | 11122 protein tyrosine phosphatase, receptor type, T     | 0.006238 | 20.97345 |
| FLJ40431  | 10451 vav 3 oncogene                                     | 0.006317 | 20.79646 |
| C7orf16   | 10842 G-substrate                                        | 0.006421 | 20.61947 |
| HSSOX6    | 55553 SRY-box containing gene 6                          | 0.006423 | 20.44248 |
| AMPH      | 273 Stiff-Man syndrome with breast cancer 128kDa         | 0.006979 | 20.26549 |
| COE3      | 253738 early B-cell factor 3                             | 0.006998 | 20.0885  |
| ACTB      | 60 PS1TP5-binding protein 1                              | 0.007052 | 19.9115  |
| AAT6      | 59 actin, alpha 2, smooth muscle, aorta                  | 0.007135 | 19.64602 |
| ACT       | 72 alpha-actin 3                                         | 0.007135 | 19.64602 |
| DKFZp434k | 7442 transient receptor potential vanilloid 1b           | 0.007192 | 19.29204 |
| SNAPAP    | 23557 SNARE associated protein snapin                    | 0.007192 | 19.29204 |
| KIAA0988  | 6904 tubulin-specific chaperone d                        | 0.007262 | 19.02655 |
| ABI-1     | 10006 nap1 binding protein                               | 0.007293 | 18.84956 |
| NR2C2     | 7182 nuclear receptor subfamily 2, group C, member 2     | 0.007413 | 18.67257 |
| EFNB2     | 1948 ephrin B2                                           | 0.007515 | 18.49558 |
| BMP6      | 654 bone morphogenetic protein 6                         | 0.007556 | 18.31858 |
| MEP1B     | 4225 endopeptidase-2                                     | 0.007683 | 18.14159 |
| NKD2      | 85409 Dvl-binding protein NKD2                           | 0.007748 | 17.9646  |
| MAF       | 4094 Avian musculoaponeurotic fibrosarcoma (MAF)         | 0.007833 | 17.78761 |
| KDP       | 65125 serine/threonine-protein kinase WNK1               | 0.007949 | 17.61062 |
| LGMD1     | 9499 limb-girdle muscular dystrophy 1A                   | 0.008247 | 17.43363 |
| GP6       | 51206 glycoprotein VI (platelet)                         | 0.00832  | 17.25664 |

|           |        |                                                     |          |          |
|-----------|--------|-----------------------------------------------------|----------|----------|
| FLOT1     | 10211  | flotillin 1                                         | 0.008447 | 17.07965 |
| B2-1      | 9267   | homolog of secretory protein SEC7                   | 0.008585 | 16.90265 |
| EHK3      | 2045   | Eph homology kinase-3                               | 0.008588 | 16.72566 |
| CHRD      | 8646   | chordin                                             | 0.008711 | 16.54867 |
| GHRF      | 2691   | somatocrinin                                        | 0.008962 | 16.37168 |
| 87U6      | 2773   | guanine nucleotide binding protein (G protein)      | 0.009199 | 16.10619 |
| GNAI1     | 2770   | Gi1 protein alpha subunit                           | 0.009199 | 16.10619 |
| AT3       | 4287   | Machado-Joseph disease protein 1                    | 0.009644 | 15.84071 |
| ADRA2     | 150    | alpha2A adrenergic receptor                         | 0.0102   | 15.66372 |
| E14       | 4863   | nuclear protein, ataxia-telangiectasia locus        | 0.010458 | 15.48673 |
| FLJ27265  | 3150   | high-mobility group (nonhistone chromosomal)        | 0.010481 | 15.30973 |
| IGIF      | 3606   | interleukin-18                                      | 0.010487 | 15.13274 |
| EAT2      | 117157 | SH2 domain-containing molecule EAT2                 | 0.010781 | 14.95575 |
| DKFZp686A | 3146   | high-mobility group (nonhistone chromosomal)        | 0.010987 | 14.69027 |
| HMG2      | 3148   | high-mobility group box 2                           | 0.010987 | 14.69027 |
| FLJ93058  | 4688   | neutrophil cytosolic factor 2 (65kD)                | 0.011107 | 14.42478 |
| Fug1      | 5905   | Ran GTPase activating protein 1                     | 0.011577 | 14.24779 |
| PFM2      | 11107  | PR domain containing 5                              | 0.011671 | 14.0708  |
| MSK       | 150094 | myocardial SNF1-like kinase                         | 0.012007 | 13.89381 |
| CFD       | 200576 | 1-phosphatidylinositol-4-phosphate 5-kinase         | 0.012079 | 13.62832 |
| HSF2      | 3298   | heat shock transcription factor 2                   | 0.012079 | 13.62832 |
| AOF2      | 23028  | lysine (K)-specific demethylase 1                   | 0.012149 | 13.36283 |
| CD301     | 10462  | macrophage C-type lectin                            | 0.012385 | 13.18584 |
| AD3L      | 5664   | presenilin 2                                        | 0.013128 | 13.00885 |
| CLR11.4   | 171389 | NLR family, pyrin domain containing 6               | 0.013165 | 12.83186 |
| AR7       | 7067   | triiodothyronine receptor                           | 0.013818 | 12.56637 |
| ERBA-BETA | 7068   | generalized resistance to thyroid hormone           | 0.013818 | 12.56637 |
| ARHGAP7   | 10395  | START domain containing protein 12                  | 0.013845 | 12.30088 |
| ARHGAP21  | 23092  | GTPase regulator                                    | 0.013911 | 12.12389 |
| CCBP2     | 1238   | chemokine (C-C motif) receptor 9                    | 0.014034 | 11.9469  |
| CD350     | 11211  | frizzled 10                                         | 0.014138 | 11.76991 |
| IHPS1     | 4842   | neuronal nitric oxide synthase                      | 0.01438  | 11.50442 |
| SSTR5     | 6755   | somatostatin receptor subtype 5                     | 0.01438  | 11.50442 |
| C15       | 51316  | placenta-specific 8                                 | 0.014465 | 11.23894 |
| MEL-18    | 7703   | zinc finger protein 144                             | 0.014561 | 11.06195 |
| FZD7      | 8324   | frizzled homolog 7 (Drosophila)                     | 0.014677 | 10.88496 |
| ATP1A1    | 476    | Na <sup>+</sup> /K <sup>+</sup> ATPase 1            | 0.014814 | 10.70796 |
| ZABC1     | 7764   | zinc finger protein 217                             | 0.015093 | 10.53097 |
| LSP1      | 4046   | F-actin binding and cytoskeleton associated protein | 0.016518 | 10.35398 |
| ERK3      | 6300   | stress-activated protein kinase 3                   | 0.016622 | 10.17699 |
| APC3      | 996    | cell division cycle protein 27                      | 0.016837 | 10       |
| CCK-B     | 887    | CCK2 receptor                                       | 0.017404 | 9.823009 |
| CCK       | 885    | cholecystokinin                                     | 0.017706 | 9.646018 |
| ARNT2     | 9915   | aryl-hydrocarbon receptor nuclear translocator 2    | 0.01782  | 9.469027 |
| MESP1     | 55897  | mesoderm posterior 1 homolog (mouse)                | 0.018065 | 9.20354  |
| TRP32     | 9352   | thioredoxin-related 32 kDa protein                  | 0.018065 | 9.20354  |
| DKFZp686E | 6184   | dolichyl-diphosphooligosaccharide-protein           | 0.018484 | 8.938053 |

|           |                                                                      |          |          |
|-----------|----------------------------------------------------------------------|----------|----------|
| FGG       | 2266 fibrinogen, gamma polypeptide                                   | 0.019054 | 8.761062 |
| CFL       | 1072 cofilin 1 (non-muscle)                                          | 0.019366 | 8.584071 |
| CAP-3     | 5272 protease inhibitor 9 (ovalbumin type)                           | 0.01941  | 8.40708  |
| BP        | 3240 binding peptide                                                 | 0.0196   | 8.230088 |
| CRF-R     | 1394 seven transmembrane helix receptor                              | 0.019693 | 7.964602 |
| CRFR2     | 1395 corticotropin releasing hormone receptor 2                      | 0.019693 | 7.964602 |
| FLJ23903  | 4641 nuclear myosin I                                                | 0.020847 | 7.699115 |
| CC10      | 7356 Uteroglobulin (Clara-cell specific 10-kD protein)               | 0.02251  | 7.522124 |
| CAPB      | 832 capping protein (actin filament) muscle Z-line, beta             | 0.022943 | 7.345133 |
| APBA1     | 320 amyloid beta A4 precursor protein-binding, family A, member 1    | 0.023111 | 7.168142 |
| FLJ33906  | 80317 zinc finger with KRAB and SCAN domains 3                       | 0.024015 | 6.99115  |
| CISK      | 23678 cytokine-independent survival kinase                           | 0.024214 | 6.814159 |
| GPRK1     | 6011 G protein-coupled receptor kinase 1                             | 0.024755 | 6.637168 |
| INPP5D    | 3635 signaling inositol polyphosphate 5 phosphatase SIP-145          | 0.026525 | 6.460177 |
| CD266     | 51330 type I transmembrane protein Fn14                              | 0.026735 | 6.283186 |
| DLG3      | 1741 synapse-associated protein 102                                  | 0.027802 | 6.106195 |
| HRMT1L3   | 10196 protein arginine methyltransferase 3                           | 0.028235 | 5.929204 |
| DADR      | 1812 dopamine receptor D1                                            | 0.028856 | 5.752212 |
| K17       | 3872 keratin 17                                                      | 0.028922 | 5.575221 |
| BWCR      | 1028 cyclin-dependent kinase inhibitor 1C                            | 0.02993  | 4.955752 |
| CDP2      | 23316 cut-like 2                                                     | 0.02993  | 4.955752 |
| CSF2      | 1437 granulocyte-macrophage colony stimulating factor                | 0.02993  | 4.955752 |
| GASP      | 9737 G protein-coupled receptor-associated sorting protein           | 0.02993  | 4.955752 |
| HACE1     | 57531 HECT domain and ankyrin repeat containing, E3 ubiquitin prote  | 0.02993  | 4.955752 |
| IPOA4     | 3839 importin-alpha-Q2                                               | 0.02993  | 4.955752 |
| MAFF      | 23764 transcription factor MAFF                                      | 0.03051  | 4.336283 |
| ART1      | 417 ADP-ribosyltransferase 2                                         | 0.031904 | 4.159292 |
| OS9       | 10956 amplified in osteosarcoma                                      | 0.032109 | 3.982301 |
| MZF-1     | 7593 zinc finger protein 42                                          | 0.035275 | 3.80531  |
| C3B-INA   | 3426 light chain of factor I                                         | 0.035673 | 3.628319 |
| FLJ36928  | 9568 G protein-coupled receptor 51                                   | 0.03581  | 3.362832 |
| FLJ92613  | 2550 GABA-B receptor                                                 | 0.03581  | 3.362832 |
| E2(17)KB1 | 7321 ubiquitin-conjugating enzyme E2D 1                              | 0.03581  | 3.00885  |
| PNOC      | 5368 prepronociceptin                                                | 0.03581  | 3.00885  |
| BGR       | 64581 C-type (calcium dependent                                      | 0.036606 | 2.743363 |
| ADAP      | 2533 FYN-binding protein (FYB-120/130)                               | 0.036644 | 2.566372 |
| 5-HT1A    | 3350 G protein coupled receptor                                      | 0.03735  | 2.389381 |
| HDLQ12    | 3990 lipase C                                                        | 0.039504 | 2.212389 |
| IFI-4     | 4938 2-5A synthetase 1                                               | 0.041655 | 2.035398 |
| DKFZp686C | 4703 nebulin                                                         | 0.042107 | 1.858407 |
| BCD541    | 6606 survival of motor neuron 1, telomeric                           | 0.043264 | 1.504425 |
| BCD541    | 6607 survival of motor neuron 2, centromeric                         | 0.043264 | 1.504425 |
| FBP2      | 8570 KH-type splicing regulatory protein                             | 0.043264 | 1.504425 |
| IKBB      | 4793 nuclear factor of kappa light polypeptide gene enhancer in B-ce | 0.044939 | 1.150442 |
| CAB1      | 782 dihydropyridine-sensitive L-type, calcium channel beta-1 subur   | 0.04509  | 0.973451 |
| CACNB2    | 783 calcium channel, voltage-dependent, beta 2 subunit               | 0.045268 | 0.707965 |
| HMOX2     | 3163 heme oxygenase (decycling) 2                                    | 0.045268 | 0.707965 |

|        |                                                        |          |          |
|--------|--------------------------------------------------------|----------|----------|
| CDGAP  | 57514 CDGAP                                            | 0.047466 | 0.442478 |
| CACNB3 | 784 calcium channel, voltage-dependent, beta 3 subunit | 0.049138 | 0.265487 |
| Bx42   | 22938 nuclear protein SkiP                             | 0.049704 | 0.088496 |
